# Supplementary material
Source: publisher figshare collection journal article supplement (https://acs.figshare.com/ndownloader/files/4251250)

# Supporting Information

## Small Molecule Receptor Protein Tyrosine Phosphatase $\gamma$ (RPTP $\gamma$ )

### Ligands That Inhibit Phosphatase Activity via Perturbation of the Tryptophan-Proline-Aspartate (WPD)-Loop

*Steven Sheriff, Brett R. Beno, Weixu Zhai, Walter A. Kostich, Patricia A. McDonnell, Kevin Kish, Valentina Goldfarb, Mian Gao, Susan E. Kiefer, Joseph Yanchunas, Yanling Huang, Shuhao Shi, Shirong Zhu, Carolyn Dzierba, Joanne Bronson, John E. Macor, Kingsley K. Appiah, Ryan S. Westphal, Jonathan O'Connell, Samuel W. Gerritz*

#### Table of Contents

| Topic                                                                                          | Pages   |
|------------------------------------------------------------------------------------------------|---------|
| Procedure for the synthesis of 3-mercaptothiophene-2-carboxylic acid                           | S3-S4   |
| Figure S1. Effect of compounds <b>1</b> and <b>15</b> on the thermal stability of PTP $\gamma$ | S5      |
| Table S1. Refinement statistics                                                                | S6-S7   |
| Figures showing X-ray co-crystal structures of RPTP $\gamma$ with compound <b>1</b> analogs    | S8      |
| Figure S2. Compound <b>S1</b> bound to RPTP $\gamma$                                           | S9      |
| Figure S3. Compound <b>12</b> bound to RPTP $\gamma$ .                                         | S10     |
| Figure S4. Compound <b>14</b> bound to RPTP $\gamma$ .                                         | S11     |
| Figure S5. Compound <b>15</b> bound to RPTP $\gamma$ .                                         | S12     |
| Figure S6. Compound <b>17</b> bound to RPTP $\gamma$ .                                         | S13     |
| Figure S7. Compound <b>20</b> bound to RPTP $\gamma$ .                                         | S14-S15 |
| Sheriff <i>et al.</i> , “Small Molecule RPTP $\gamma$ Ligands ...” Supporting Information      | S1      |

|                                                        |         |
|--------------------------------------------------------|---------|
| Figure S8. Compound <b>S2</b> bound to RPTP $\gamma$ . | S16-S17 |
| NMR spectra for compounds <b>2-23</b>                  | S18-S36 |
| LC/MS spectra for compounds <b>2-23</b>                | S37-S96 |

### Procedure for the synthesis of 3-mercaptothiophene-2-carboxylic acid:

3-Mercaptothiophene-2-carboxylic acid was prepared according to the literature procedure (Corral, C.; Lissavetzky, J.; Alvarez-Insua, A. S.; Valdeolmillos, A. M. *Org. Prep. Proc. Int.* **1985**, *17*, 163) as shown below:

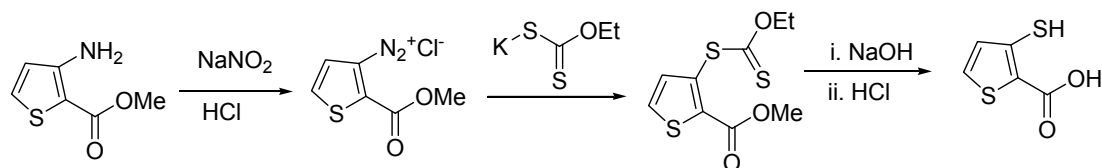

To 14 mL of 6 M HCl solution was added 3-amino-2-methoxycarbonylthiophene (2.5 g, 16 mmol, 1.0 eq.) gradually at room temperature. The resulting mixture was stirred at room temperature for 30 min, cooled to 0 °C, then diazotized with NaNO<sub>2</sub> (1.1 g, 16 mmol, 1.0 eq.) in 8 mL of water. After the resulting mixture was stirred at 0 °C for an additional 1 h, the mixture was slowly poured into a well-stirred solution of Na<sub>2</sub>CO<sub>3</sub> (2.2 g, 19 mmol) and potassium ethylxanthogenate in 25 mL of water. The resulting mixture was warmed and maintained at 60-70 °C until the evolution of nitrogen ceased. After cooling to room temperature, the mixture was extracted with EtOAc (3x). The combined organic layer was washed with 10% sodium hydroxide (20 mL) and water (2 x 20 mL), dried (anh. sodium sulfate) and evaporated under reduced pressure to afford an oil, which was dissolved in ethanol (15 mL), then 125 mL of 4M sodium hydroxide was added. The resulting mixture was heated to reflux for 2 h. It was then cooled to room temperature and ethanol was removed by evaporation. Water was added and the mixture was extracted with ether (2x) to remove impurities. The aqueous layer was acidified with 6N HCl to pH = 3, then extracted with EtOAc (3x). The combined organic layer was dried and evaporated to leave 2.29 g of solid as the product. <sup>1</sup>H NMR (DMSO-d<sub>6</sub>)

$\delta$ : 1.15 (1H, s), 7.2 (1H, d,  $J = 5$  Hz), 7.95 (1H, d,  $J = 5$  Hz). LC/MS (ESI)  $m/z$  ( $M+H$ )<sup>+</sup>: 319.05,  $t_R = 0.840$  min.

**General procedure for preparation of compound 1:**

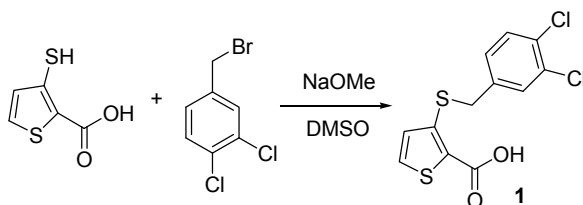

To a solution of 3-mercaptothiophene-2-carboxylic acid (1.07 g, 6.69 mM, 1.0 eq.) and 3,4-dichlorobenzyl bromide (1.6 g, 6.69 mmol, 1.0 eq.) in DMSO (15 mL) was added NaOMe (25 wt. % in methanol, 3.06 mL, 13.375 mM, 2.0 eq.) dropwise at room temperature. The resulting mixture was stirred at room temperature for 6 h, then poured into water (10 mL), acidified with 6M HCl to pH = 4, then extracted with EtOAc (3x). The combined organic layer was washed with water (3x), brine, dried over Na<sub>2</sub>SO<sub>4</sub> and evaporated under reduced pressure to afford 1.81 g (85% yield) of 3-(3,4-dichlorobenzylthio)thiophene-2-carboxylic acid **1** as off-white solid. <sup>1</sup>H NMR (DMSO-d<sub>6</sub>)  $\delta$ : 7.90 (1H, d,  $J = 5.2$  Hz), 7.84 (1H, s), 7.70 (1H, d,  $J = 8$  Hz), 7.61 (1H, d,  $J = 8.2$  Hz), 7.34 (1H, d,  $J = 5.2$  Hz), 4.53 (2H, s). LC/MS (ESI)  $m/z$  ( $M+H$ )<sup>+</sup>: 318.0,  $t_R = 0.915$  min.

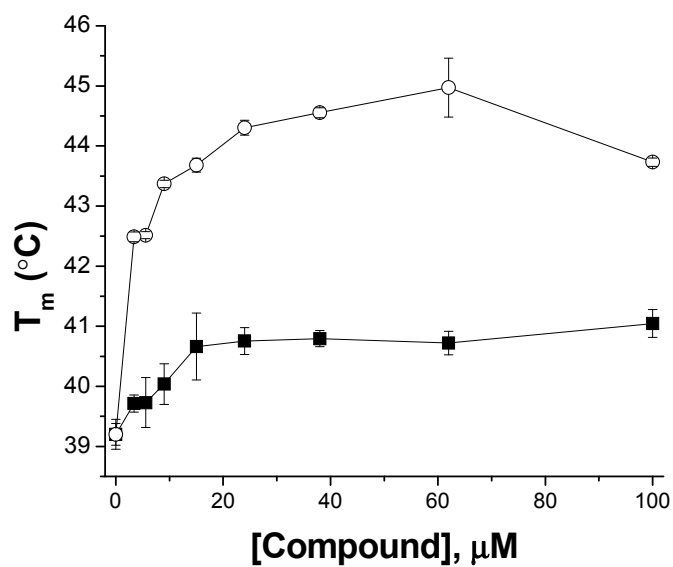

**Figure S1.** Effect of compounds **1** (■) and **15** (○) on the thermal stability of PTP $\gamma$ . Error bars represent standard deviation from multiple replicates. Reactions contained 2.6  $\mu\text{M}$  PTP $\gamma$ , 25 mM MOPS, pH 7, 100 mM NaCl, 1 mM DTT, 0.2 mM EDTA, 200  $\mu\text{M}$  1,8-ANS, and 5% (v/v) DMSO.

**Table S1. Refinement statistics****(a) “open” forms**

|                                      | apo,<br>orthorhombic | apo,<br>trigonal |
|--------------------------------------|----------------------|------------------|
| Resolution, Å                        | 23.5-2.1             | 49.5-2.41        |
| R-work                               | 0.254                | 0.198            |
| R-free                               | 0.305                | 0.234            |
| r.m.s.d. bond distances, Å           | 0.005                | 0.010            |
| r.m.s.d. bond angles, °              | 0.8                  | 1.1              |
| Ramachandran favored and allowed, %* | 99.0                 | 98.5             |
| Ramachandran disallowed, %*          | 0                    | 0                |
| PDB ID                               | 3QCB                 | 3QCN             |

**(b) “closed” forms**

|                                      | Vanadate,<br>orthorhombic | Vanadate,<br>trigonal |
|--------------------------------------|---------------------------|-----------------------|
| Resolution, Å                        | 40.7-2.1                  | 26.4-1.8              |
| R-work                               | 0.224                     | 0.241                 |
| R-free                               | 0.266                     | 0.258                 |
| r.m.s.d. bond distances, Å           | 0.006                     | 0.006                 |
| r.m.s.d. bond angles, °              | 0.9                       | 0.9                   |
| Ramachandran favored and allowed, %* | 99.2                      | 99.6                  |
| Ramachandran disallowed, %*          | 0                         | 0                     |
| PDB ID                               | 3QCC                      | 3QCD                  |

**(c) “super-open” forms**

|                                      | Compound <b>1</b> ,<br>co-crystal | Compound <b>1</b> ,<br>soak | Compound <b>S1</b> ,<br>soak |
|--------------------------------------|-----------------------------------|-----------------------------|------------------------------|
| Resolution, Å                        | 25.4-2.5                          | 31.4-2.1                    | 27.6-2.05                    |
| R-work                               | 0.264                             | 0.233                       | 0.218                        |
| R-free                               | 0.324                             | 0.261                       | 0.254                        |
| r.m.s.d. bond distances, Å           | 0.007                             | 0.006                       | 0.006                        |
| r.m.s.d. bond angles, °              | 1.4                               | 1.3                         | 1.3                          |
| Ramachandran favored and allowed, %* | 99.0                              | 99.2                        | 99.6                         |
| Ramachandran disallowed, %*          | 0.0                               | 0.0                         | 0.0                          |
| PDB ID                               | 3QCF                              | 3QCE                        | 3QCG                         |

|                                      | Compound <b>12</b> ,<br>soak | Compound <b>14</b> ,<br>soak | Compound <b>15</b> ,<br>soak |
|--------------------------------------|------------------------------|------------------------------|------------------------------|
| Resolution, Å                        | 33.9-2.4                     | 40.1-2.26                    | 40.2-2.26                    |
| R-work                               | 0.240                        | 0.241                        | 0.217                        |
| R-free                               | 0.271                        | 0.289                        | 0.245                        |
| r.m.s.d. bond distances, Å           | 0.007                        | 0.007                        | 0.006                        |
| r.m.s.d. bond angles, °              | 1.4                          | 1.0                          | 1.3                          |
| Ramachandran favored and allowed, %* | 99.2                         | 98.8                         | 99.2                         |
| Ramachandran disallowed, %*          | 0.0                          | 0.4                          | 0.0                          |
| PDB ID                               | 3QCH                         | 3QCI                         | 3QCJ                         |

  

|                                      | Compound <b>17</b> ,<br>soak | Compound <b>20</b> ,<br>soak | Compound <b>S2</b> ,<br>co-crystal |
|--------------------------------------|------------------------------|------------------------------|------------------------------------|
| Resolution, Å                        | 30.1-2.05                    | 33.8-2.4                     | 39.4-2.4                           |
| R-work                               | 0.245                        | 0.217                        | 0.201                              |
| R-free                               | 0.262                        | 0.258                        | 0.246                              |
| r.m.s.d. bond distances, Å           | 0.006                        | 0.010                        | 0.010                              |
| r.m.s.d. bond angles, °              | 0.8                          | 1.1                          | 1.1                                |
| Ramachandran favored and allowed, %* | 98.8                         | 99.2                         | 98.8                               |
| Ramachandran disallowed, %*          | 0.0                          | 0.4                          | 0.2                                |
| PDB ID                               | 3QCK                         | 3QCL                         | 3QCM                               |

\* Laskowski, R. A.; MacArthur, M. W.; Moss, D. S.; Thornton, J. M. *J. Appl. Crystallogr.* **1993**, *26*, 283-291.

All structures except the trigonal apo and compounds **20** and **S2** were refined with CNX (Brünger *et al.*, 1998). The apo trigonal structures and compounds **20** and **S2** were refined with autoBUSTER (Blanc *et al.*, 2004).

**Figures showing X-ray co-crystal structures of RPTPy with compound 1 analogs:**

Although the structure of **1** in the trigonal crystal form was not determined, the structure of the closely related 3-(3-bromo-4-chlorobenzylthio)thiophene-2-carboxylic acid (**S1**) in the trigonal crystal form was determined to show that the same binding pattern occurs in the trigonal crystal form. Moreover, the higher resolution of this structure clarified the nature of the disorder observed in one of the two molecules in the orthorhombic crystal form, namely that the site was only partially occupied by **1** when bound to chain A and the remainder of the molecules were in the “open” conformation.



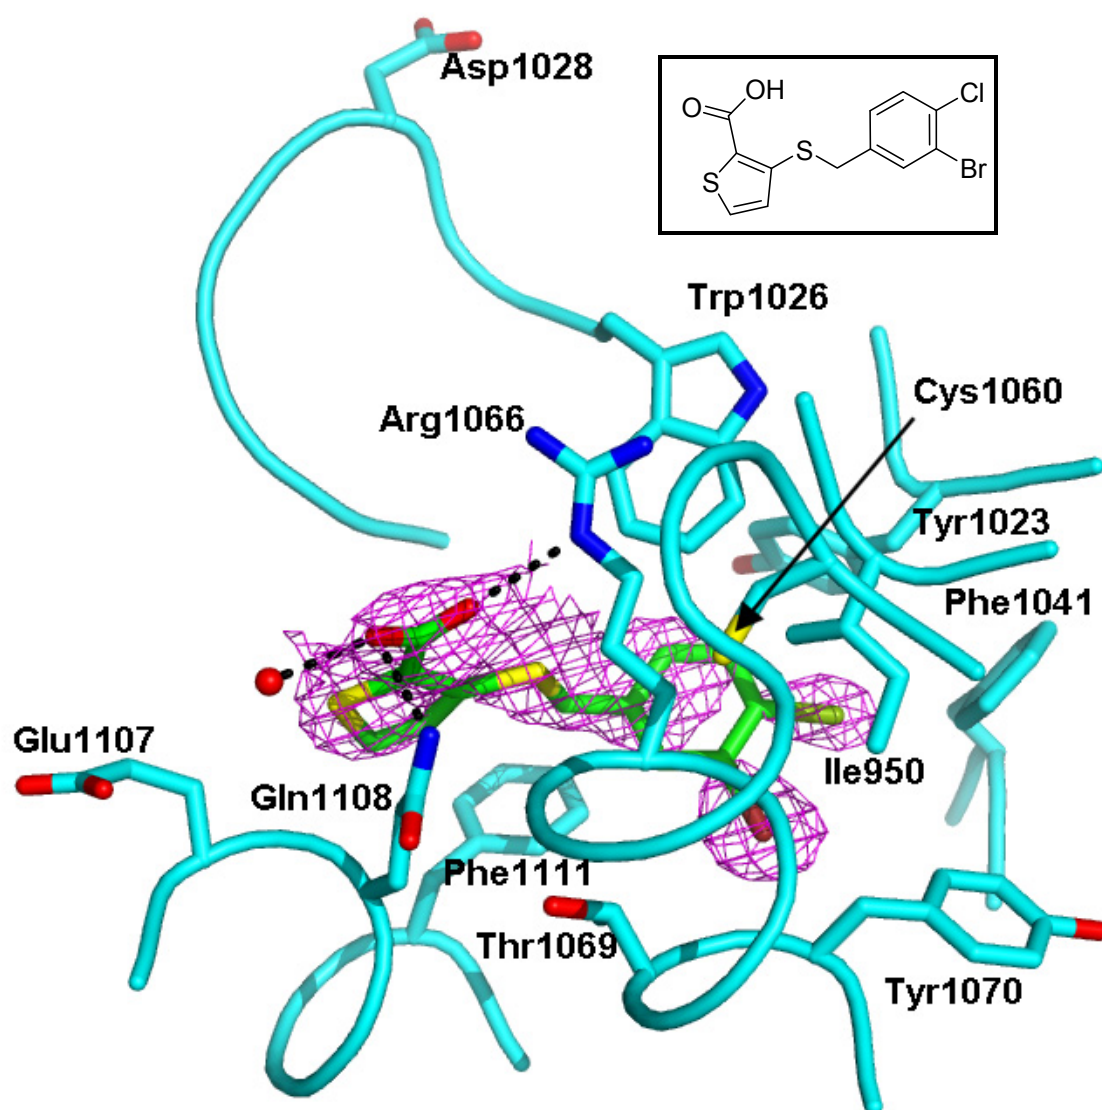

**Figure S2.** Compound S1 (3-(3-bromo-4-chlorobenzylthio)thiophene-2-carboxylic acid) bound to RPTP $\gamma$ . Selected portions of PTP $\gamma$  are shown either as a worm representing the backbone or with side chain atoms represented by sticks. RPTP $\gamma$  carbon atoms are shown in cyan. Compound S1 carbon atoms are shown in green. Nitrogen atoms are shown in blue, oxygen atoms in red, sulfur atoms in yellow, chlorine atoms in

light green, and bromine atoms in magenta. Initial (i.e. prior to fitting **S1**) 2Fo-Fc electron density is shown as magenta caged contours at 1 $\sigma$ . Image created with PyMOL.

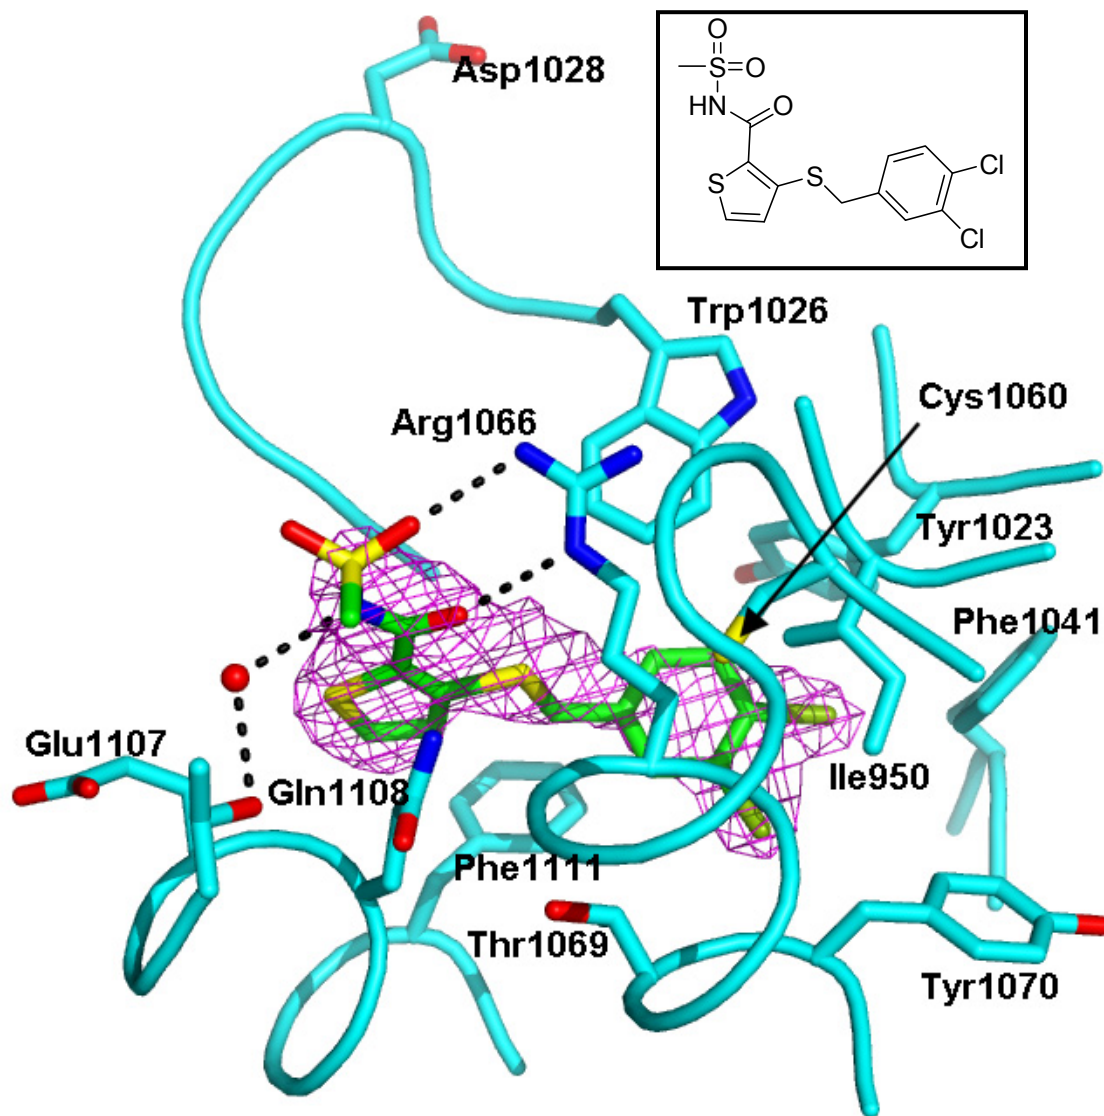

**Figure S3.** Compound **12** bound to RPTPy. Selected portions of RPTPy are shown either as a worm representing the backbone or with side chain atoms represented by

sticks. RPTPy carbon atoms are shown in cyan. Compound **12** carbon atoms are shown in green. Nitrogen atoms are shown in blue, oxygen atoms in red, sulfur atoms in yellow, and chlorine atoms in light green. Initial (i.e. prior to fitting **12**) 2Fo-Fc electron density is shown as magenta caged contours at 1 $\sigma$ . Image created with PyMOL.

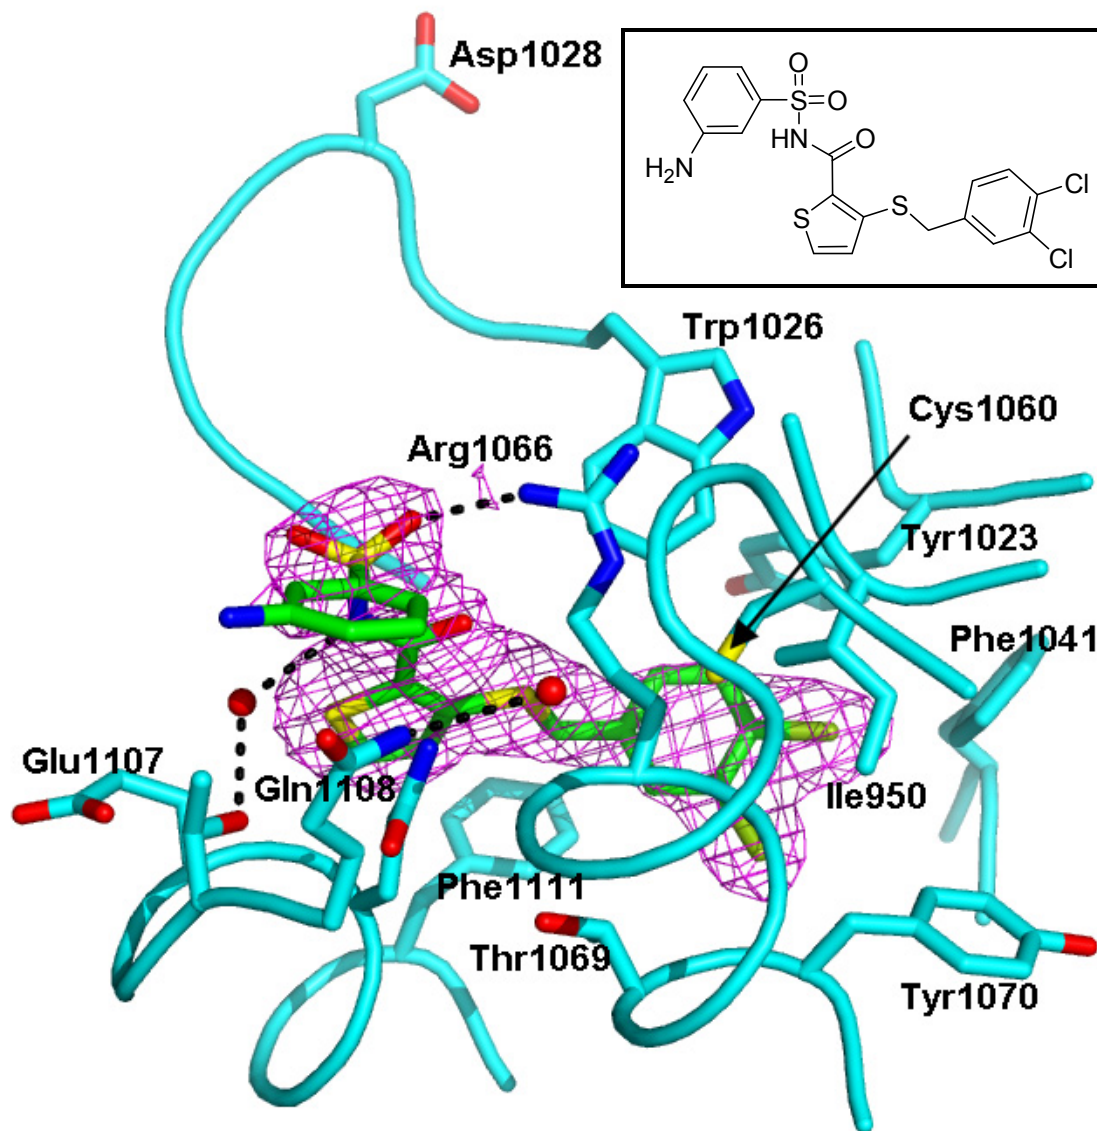

**Figure S4.** Compound **14** bound to RPTPy. Selected portions of RPTPy are shown either as a worm representing the backbone or with side chain atoms represented by

sticks. RPTPy carbon atoms are shown in cyan. Compound **14** carbon atoms are shown in green. Nitrogen atoms are shown in blue, oxygen atoms in red, sulfur atoms in yellow, and chlorine atoms in light green. Initial (i.e. prior to fitting **14**) 2Fo-Fc electron density is shown as magenta caged contours at  $1\sigma$ . Image created with PyMOL.

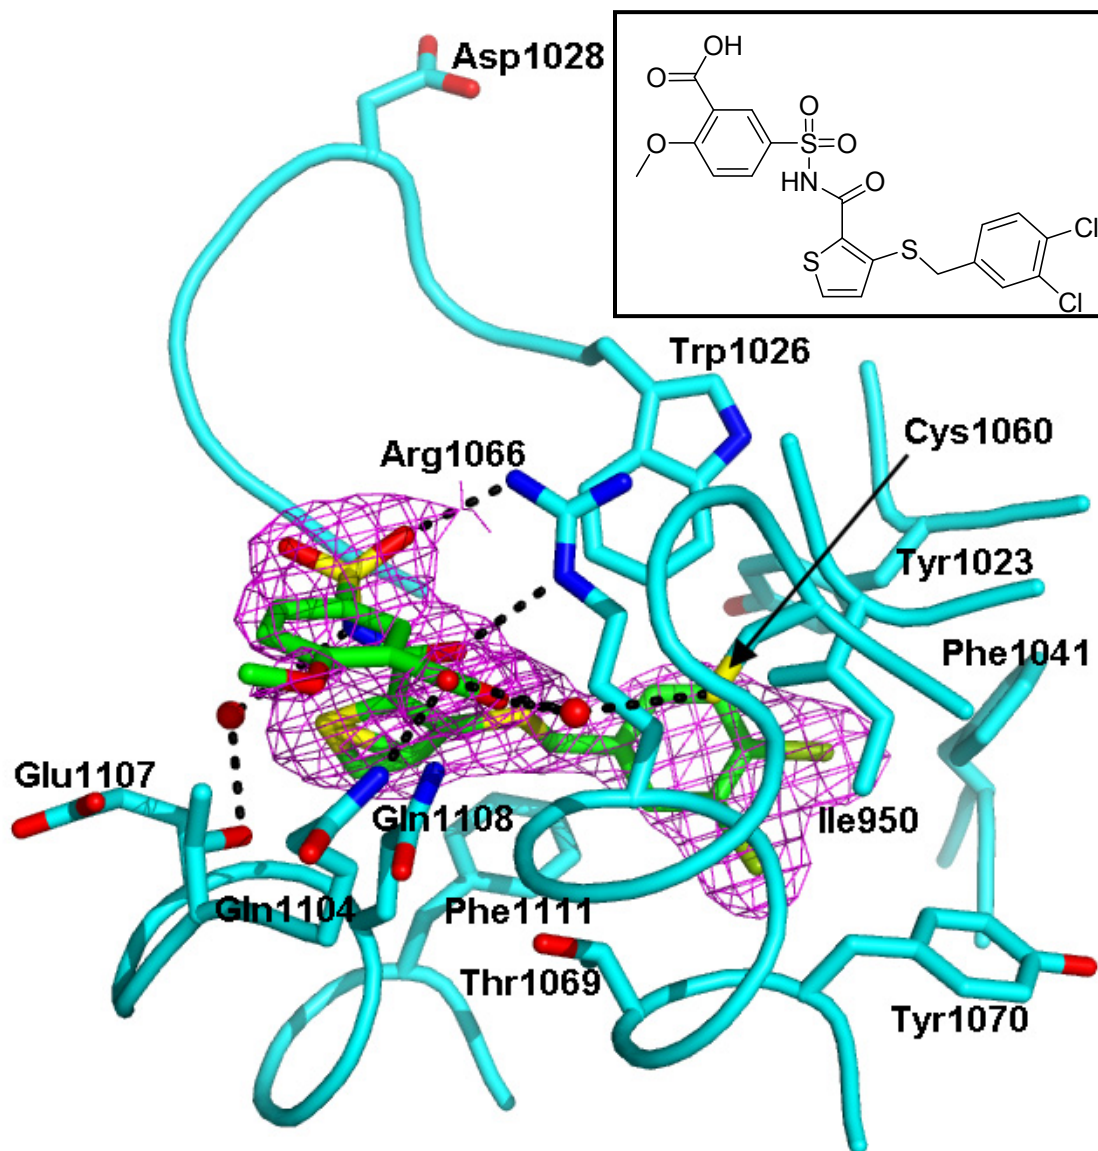

**Figure S5.** Compound **15** bound to RPTPy. Selected portions of RPTPy are shown either as a worm representing the backbone or with side chain atoms represented by



sticks. RPTPy carbon atoms are shown in cyan. Compound **15** carbon atoms are shown in green. Nitrogen atoms are shown in blue, oxygen atoms in red, sulfur atoms in yellow, and chlorine atoms in light green. Initial (i.e. prior to fitting **15**) 2Fo-Fc electron density is shown as magenta caged contours at  $1\sigma$ . Image created with PyMOL.

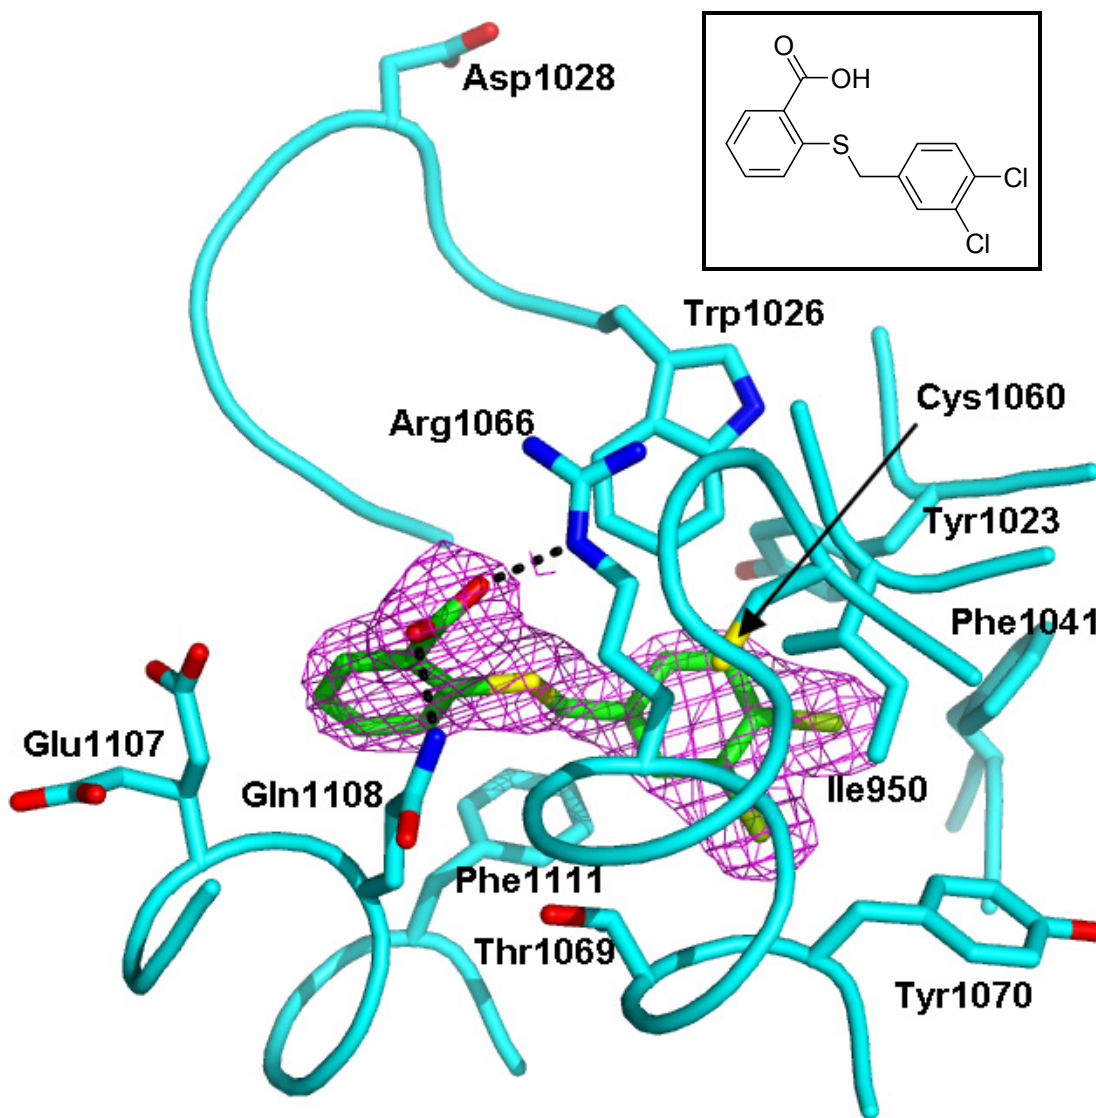

**Figure S6.** Compound **17** bound to RPTPy. Selected portions of RPTPy are shown either as a worm representing the backbone or with side chain atoms represented by

sticks. RPTPy carbon atoms are shown in cyan. Compound **17** carbon atoms are shown in green. Nitrogen atoms are shown in blue, oxygen atoms in red, sulfur atoms in yellow, and chlorine atoms in light green. Initial (i.e. prior to fitting **17**) 2Fo-Fc electron density is shown as magenta caged contours at  $1\sigma$ . Image created with PyMOL.

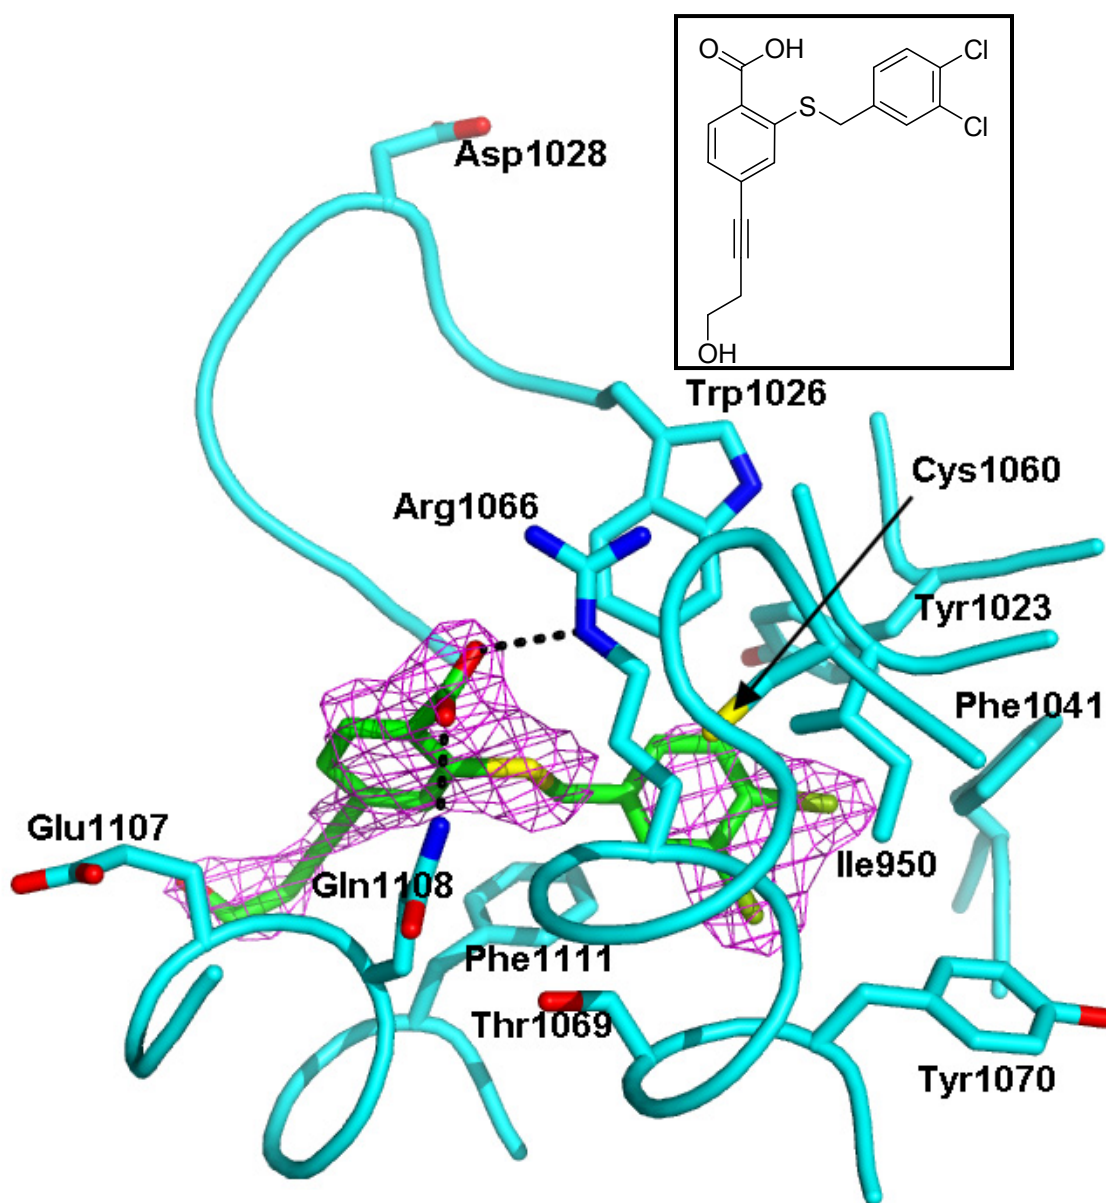

**Figure S7.** Compound **20** bound to RPTPy. Selected portions of RPTPy are shown either as a worm representing the backbone or with side chain atoms represented by

sticks. RPTPy carbon atoms are shown in cyan. Compound **20** carbon atoms are shown in green. Nitrogen atoms are shown in blue, oxygen atoms in red, sulfur atoms in yellow, and chlorine atoms in light green. Initial (i.e. prior to fitting **20**) 2Fo-Fc electron density is shown as magenta caged contours at  $1\sigma$ . Image created with PyMOL.

Modeling suggested that a rather elaborated molecule would form interactions with the side chains of Glu1106 and Glu1107. However, no improvement in binding potency was observed so the structure was determined to ascertain if the binding mode was different than predicted. This compound required co-crystallization (Kish et al., 2011). Although the initial electron density was not very good for the ethynyl linker (Figure S8), it was clear that this molecule bound more or less as expected. Although the electron density improved during refinement for the ethynyl linker, the electron density for the 2-(methylamino)ethylamino moiety remained poor, the electron density that was present was relatively near the side chains of glutamate residues 1106 and 1107.

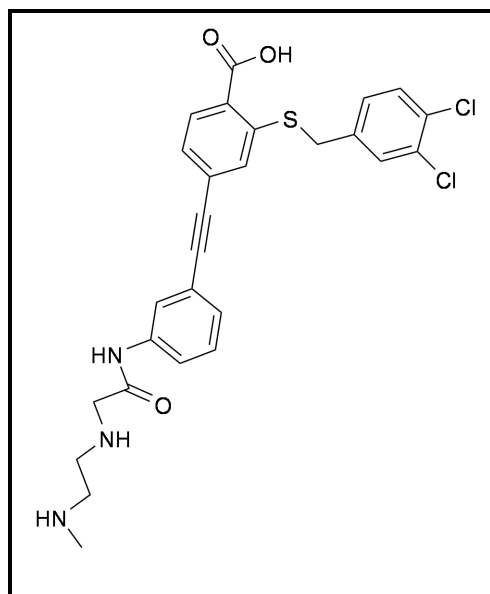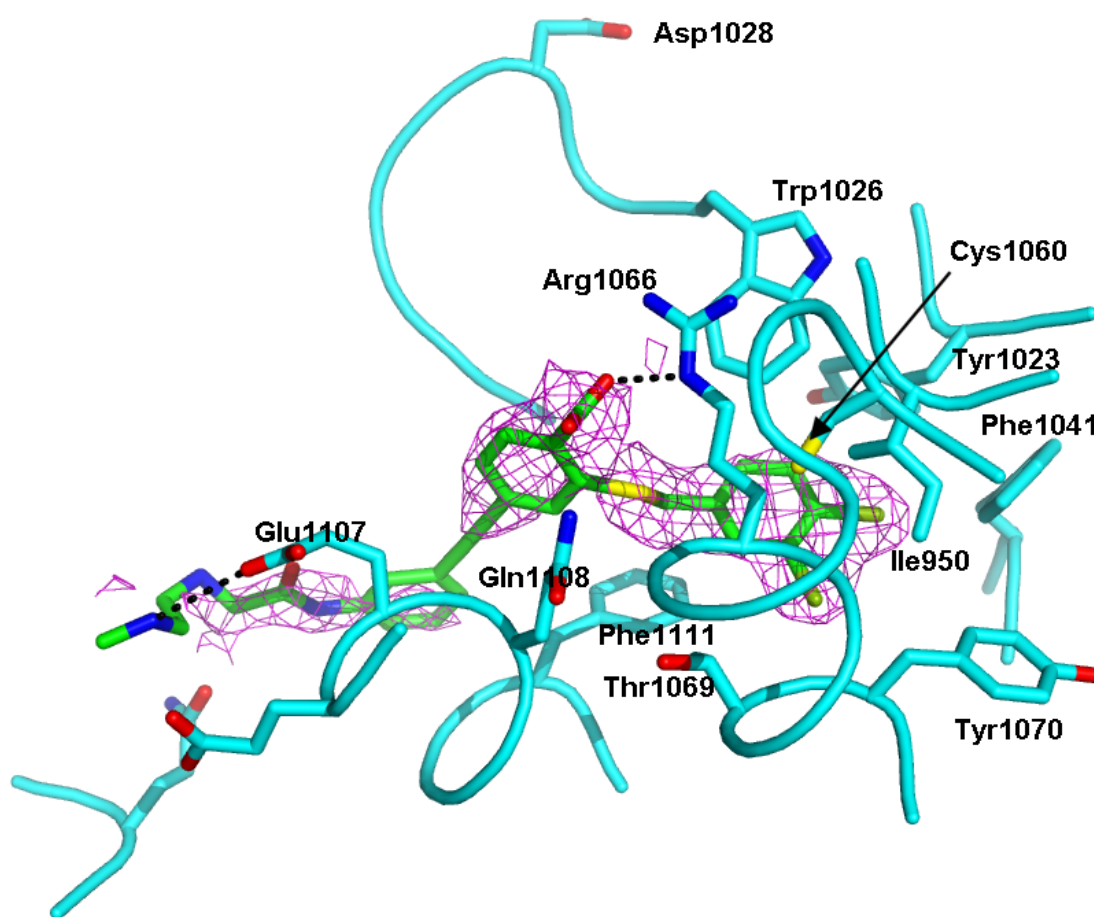



**Figure S8.** Compound **S2** bound to RPTP $\gamma$ . Selected portions of RPTP $\gamma$  are shown either as a worm representing the backbone or with side chain atoms represented by sticks. RPTP $\gamma$  carbon atoms are shown in cyan. Compound **S2** carbon atoms are shown in green. Nitrogen atoms are shown in blue, oxygen atoms in red, sulfur atoms in yellow, and chlorine atoms in light green. Initial (i.e. prior to fitting **S2**) 2Fo-Fc electron density is shown as magenta caged contours at 1 $\sigma$ . Image created with PyMOL.

Current Data Parameters  
NAME 61838-143-01  
EXPNO 10  
PROCNO 1  
F2 - Acquisition Parameters  
Date\_ 20110713  
Time 14.04  
INSTRUM AV500A  
PROBHD 5 mm PABBO BB-  
PULPROG zg30  
TD 65536  
SOLVENT MeOD  
NS 16  
DS 2  
SWH 10000.576 Hz  
FIDRES 0.137626 Hz  
AQ 3.1719923 sec  
RG 150.35  
DW 48.400 usec  
DE 6.50 usec  
TE 300.2 K  
D1 2.0000000 sec  
===== CHANNEL f1 =====  
NUC1 1H  
P1 12.00 usec  
PLW1 14.00000000 W  
SFO1 500.1360113 MHz  
F2 - Processing parameters  
SI 65536  
SF 500.1360000 MHz  
WDW EM  
SSB 0  
LB 0.30 Hz  
GB 0  
PC 1.00

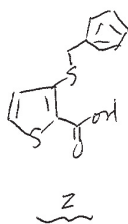

61838-143-01  
proton\_d MeOD /v zhaiw 18

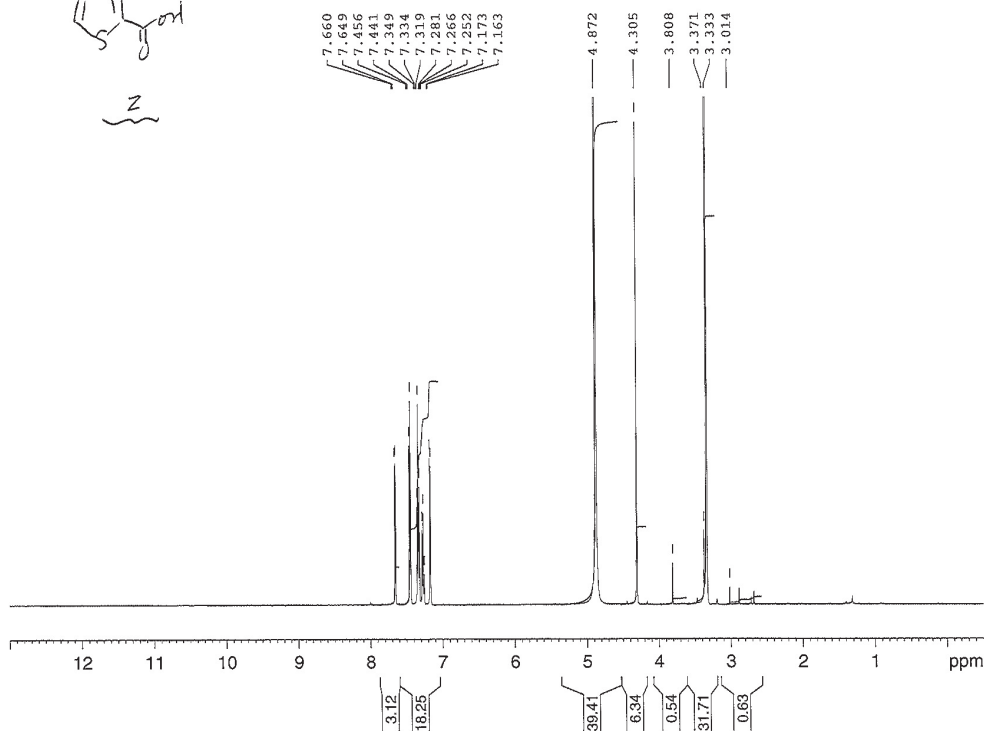

Current Data Parameters  
NAME 61838-143-13  
EXPNO 10  
PROCNO 1  
F2 - Acquisition Parameters  
Date\_ 20110713  
Time 14.09  
INSTRUM AV500A  
PROBHD 5 mm PABBO BB-  
PULPROG zg30  
TD 65536  
SOLVENT MeOD  
NS 16  
DS 2  
SWH 10000.576 Hz  
FIDRES 0.137626 Hz  
AQ 3.1719923 sec  
RG 150.35  
DW 48.400 usec  
DE 6.50 usec  
TE 300.2 K  
D1 2.0000000 sec  
===== CHANNEL f1 =====  
NUC1 1H  
P1 12.00 usec  
PLW1 14.00000000 W  
SFO1 500.1360113 MHz  
F2 - Processing parameters  
SI 65536  
SF 500.1360000 MHz  
WDW EM  
SSB 0  
LB 0.30 Hz  
GB 0  
PC 1.00

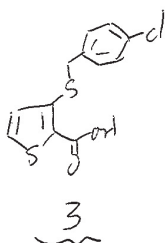

61838-143-13  
proton\_d MeOD /v zhaiw 19

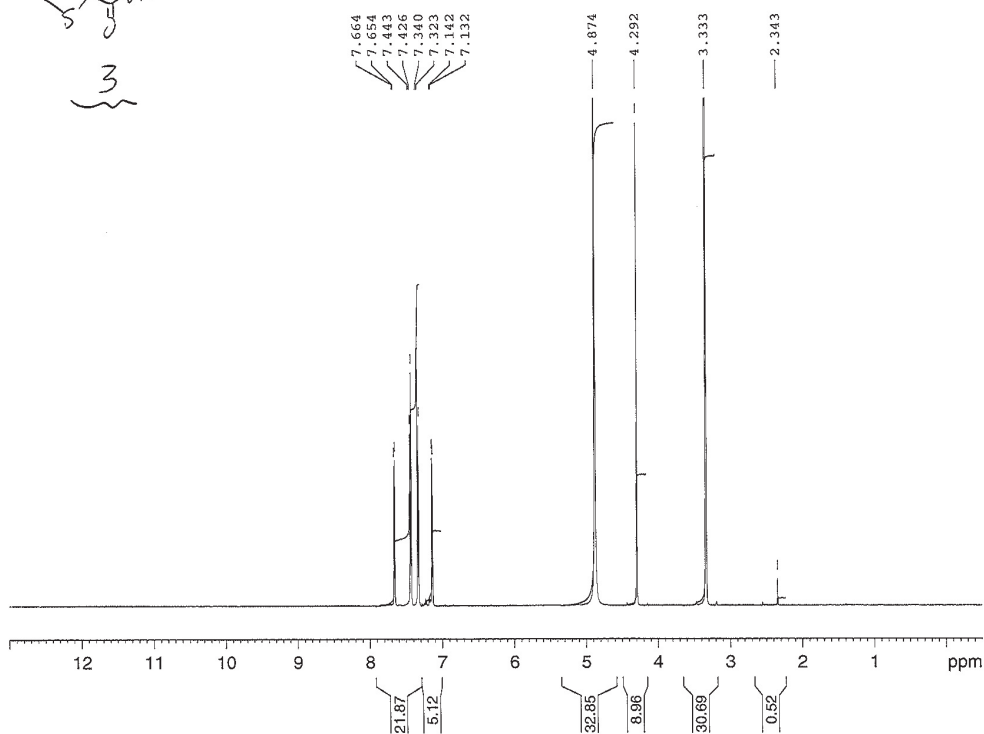

Current Data Parameters  
 NAME: 61838-143-28  
 EXPNO: 10  
 PROCNO: 1  
 F2 - Acquisition Parameters  
 Date\_: 20110713  
 Time: 14.13  
 INSTRUM: AV500A  
 PROBHD: 5 mm PABBO BB-  
 PULPROG: zg30  
 TD: 65536  
 SOLVENT: MeOD  
 NS: 16  
 DS: 2  
 SWH: 10050.578 Hz  
 F2PRES: 0.137850 Hz  
 AQ: 3.1719623 sec  
 RG: 150.30  
 DW: 48.400 usec  
 DE: 6.50 usec  
 TE: 300.1 K  
 D1: 2.00000000 sec  
 CHANNEL f1  
 NUC1: <sup>1</sup>H  
 P1: 12.00 usec  
 PLW1: 14.00000000 W  
 SFO1: 500.1360710 MHz  
 F2 - Processing parameters  
 SI: 65536  
 SF: 500.1360710 MHz  
 WDW: EM  
 SSB: 0  
 LB: 0.30 Hz  
 GB: 0  
 PC: 1.00

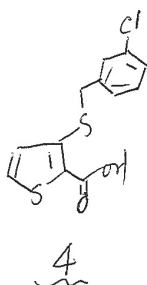

61838-143-08  
 proton\_d MeOD /v zhaiw 20

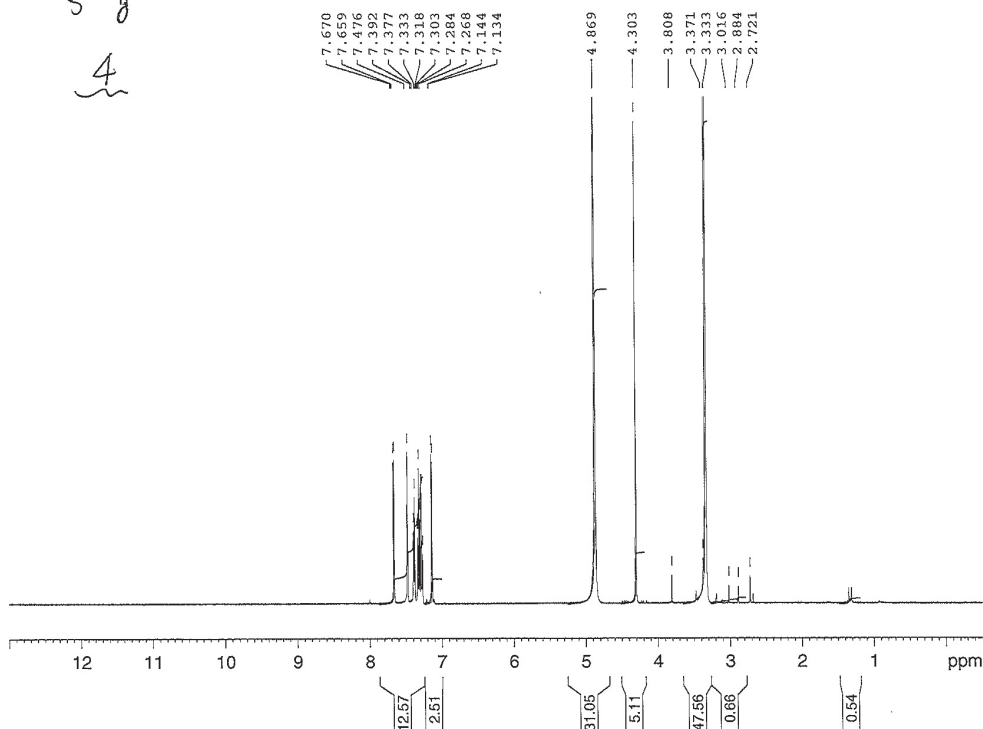

Current Data Parameters  
 NAME: 61838-144-25  
 EXPNO: 10  
 PROCNO: 1  
 F2 - Acquisition Parameters  
 Date\_: 20110713  
 Time: 14.17  
 INSTRUM: AV500A  
 PROBHD: 5 mm PABBO BB-  
 PULPROG: zg30  
 TD: 65536  
 SOLVENT: MeOD  
 NS: 16  
 DS: 2  
 SWH: 10050.578 Hz  
 F2PRES: 0.137850 Hz  
 AQ: 3.1719623 sec  
 RG: 150.30  
 DW: 48.400 usec  
 DE: 6.50 usec  
 TE: 300.1 K  
 D1: 2.00000000 sec  
 CHANNEL f1  
 NUC1: <sup>1</sup>H  
 P1: 12.00 usec  
 PLW1: 14.00000000 W  
 SFO1: 500.1360710 MHz  
 F2 - Processing parameters  
 SI: 65536  
 SF: 500.1360710 MHz  
 WDW: EM  
 SSB: 0  
 LB: 0.30 Hz  
 GB: 0  
 PC: 1.00

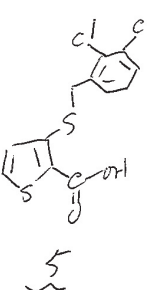

61838-144-25  
 proton\_d MeOD /v zhaiw 21

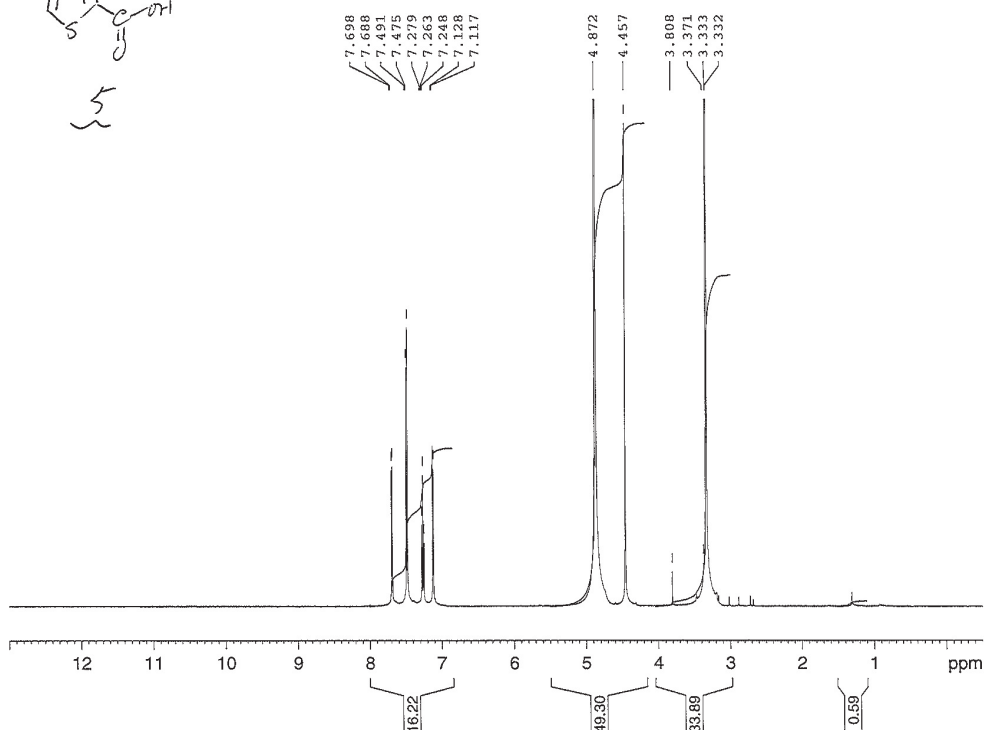

## 61838-172-04

7/13/2011 2:19:35 PM

|                        |                                                                                     |                      |                                       |         |              |                       |           |
|------------------------|-------------------------------------------------------------------------------------|----------------------|---------------------------------------|---------|--------------|-----------------------|-----------|
| Acquisition Time (sec) | 2.7329                                                                              | Comment              | 61838-172-04 proton_d MeOD v zhaiw 40 |         | Date         | 08 Feb 2006 12:36:05  |           |
| Date Stamp             | 08 Feb 2006 12:36:05                                                                |                      |                                       |         |              |                       |           |
| File Name              | \\cruncher.wfd.prl.bms.com\nmrread1\UDX2005-2007\ZHAIW\61838-172-04_10.DPX-300B.JDX |                      |                                       |         |              | Frequency (MHz)       | 300.13    |
| Nucleus                | 1H                                                                                  | Number of Transients | 16                                    | Origin  | 61838-172-04 | Original Points Count | 16384     |
| Owner                  | zhaiw                                                                               | Points Count         | 16384                                 | Solvent | METHANOL-d4  | Spectrum Offset (Hz)  | 2401.0840 |
| Sweep Width (Hz)       | 5995.20                                                                             |                      |                                       |         |              |                       |           |

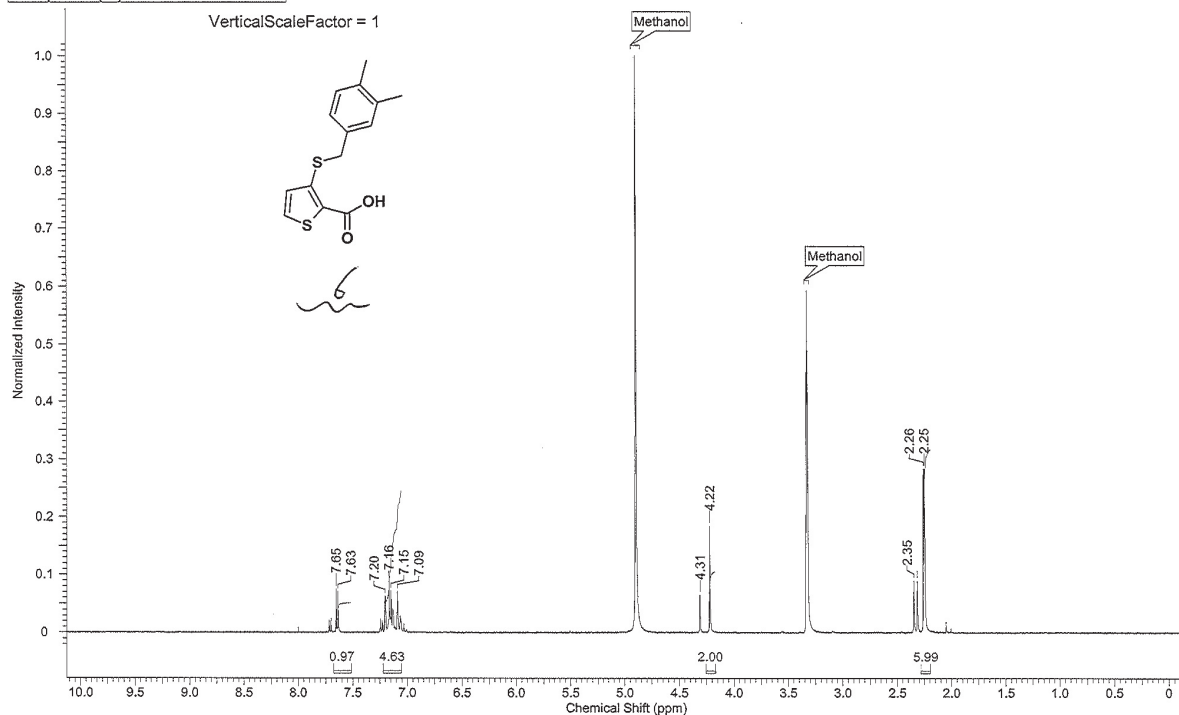

Current Data Parameters  
NAME: 61838-143-10  
EXPNO: 10  
PROCNO: 1  
F2 - Acquisition Parameters  
Date\_: 20110713  
Time: 14.22  
INSTRUM: AVS00A  
PROBHD: 5 mm P1300 BB-  
PULPROG: zgpg  
TD: 65536  
SOLVENT: MeOD  
NS: 2  
DS: 2  
SWH: 10326.879 Hz  
FIDRES: 0.157626 Hz  
AQ: 3.1719923 sec  
RG: 120.35  
RW: 48.400 usec  
LB: 6.50 usec  
GB: 300.1 Hz  
GB2: 2.20000000 sec  
===== CHANNEL f1 =====  
NUC1: <sup>1</sup>H  
P1: 12.00 usec  
PLW1: 14.0000000 W  
SFO1: 500.1360710 MHz  
F2 - Processing parameters  
SI: 500.1360000 MHz  
WDW: EM  
SSB: 0  
LB: 0.30 Hz  
GB: 0  
PC: 1.00

61838-143-10  
proton\_d MeOD /v zhaiw 22

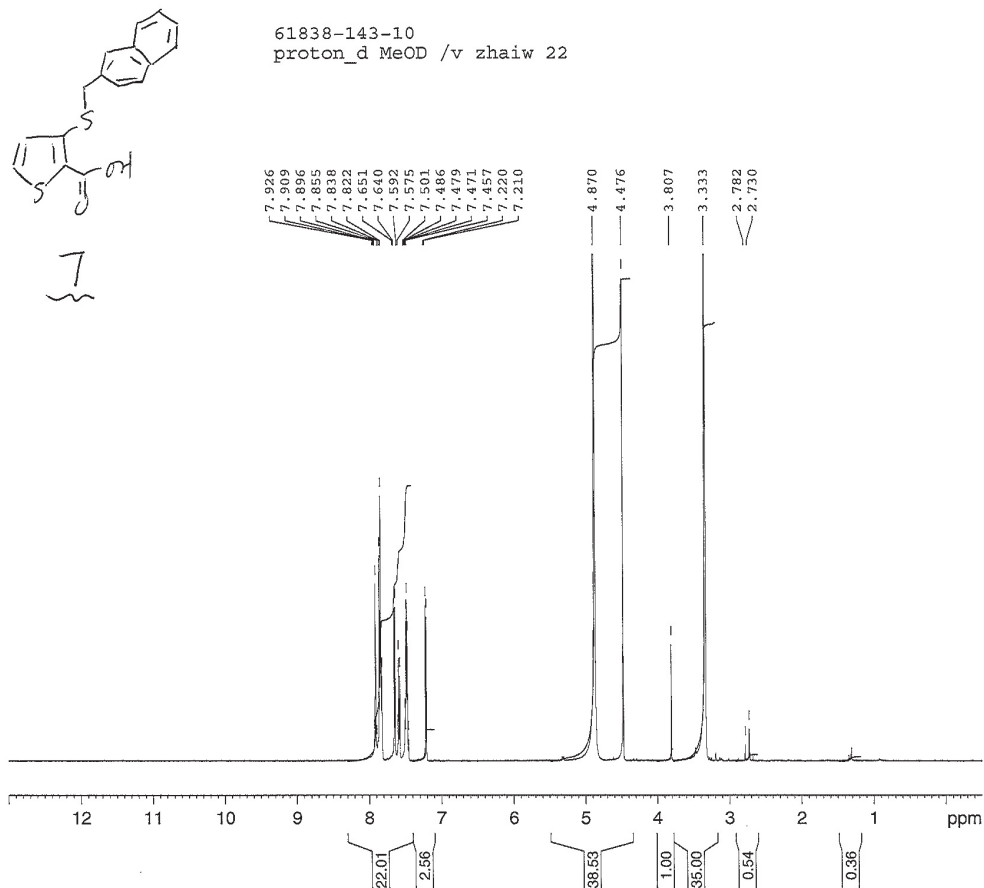

## 61838-172-01

7/11/2011 10:36:48 AM

|                        |                                                                                    |                      |                                       |                       |                      |
|------------------------|------------------------------------------------------------------------------------|----------------------|---------------------------------------|-----------------------|----------------------|
| Acquisition Time (sec) | 2.7329                                                                             | Comment              | 61838-172-01 proton_d MeOD v zhaiw 14 | Date                  | 07 Feb 2006 09:55:53 |
| Date Stamp             | 07 Feb 2006 09:55:53                                                               |                      |                                       |                       |                      |
| File Name              | \\cruncher.wfd.pri.bms.com\nmread1\JDX2005-2007\ZHAIW\61838-172-01_10_DPX-300B.JDX |                      |                                       | Frequency (MHz)       | 300.13               |
| Nucleus                | <sup>1</sup> H                                                                     | Number of Transients | 16                                    | Origin                | 61838-172-01         |
| Owner                  | zhaiw                                                                              | Points Count         | 16384                                 | Solvent               | METHANOL-d4          |
| Sweep Width (Hz)       | 5995.20                                                                            |                      |                                       | Original Points Count | 16384                |
|                        |                                                                                    |                      |                                       | Spectrum Offset (Hz)  | 2401.0840            |

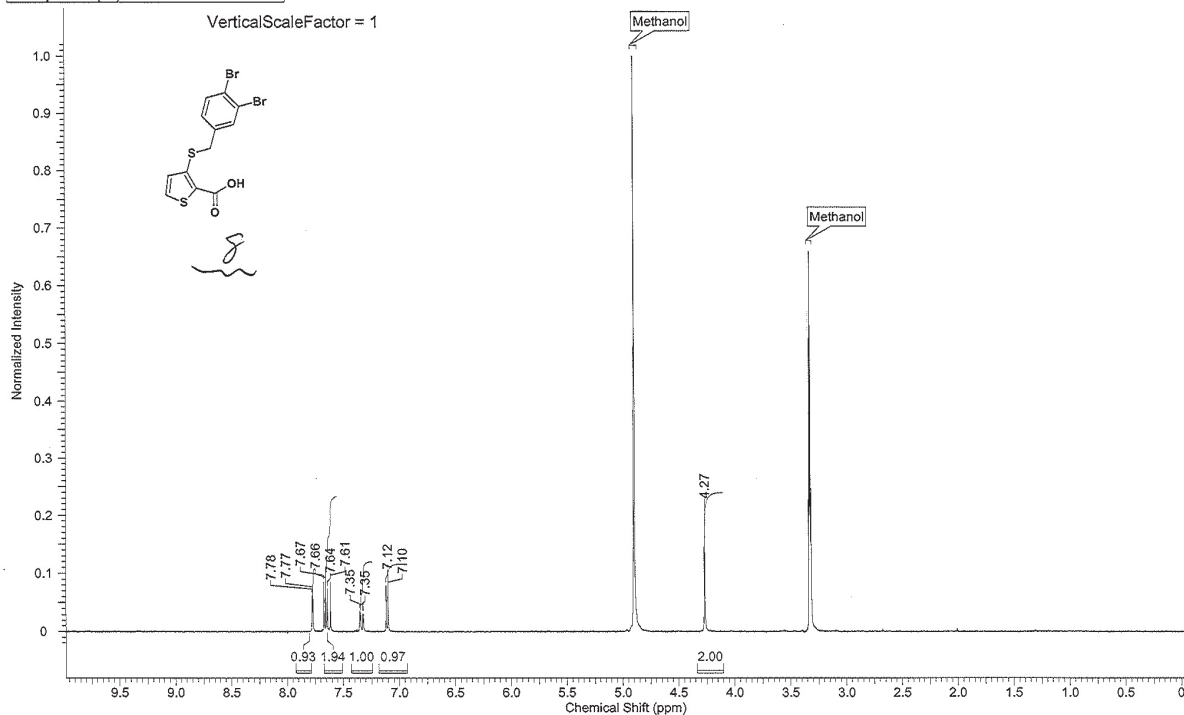

Current Data Parameters  
NAME 61838-193  
EXPNO 10  
PROCNO 1  
F2 - Acquisition Parameters  
Date\_ 20110713  
Time 14.25  
INSTRUM AVS00A  
PROBHD 5 mm FASG0 DB-  
PULPROG zgpg30  
TD 65536  
SOLVENT MeOD  
DS 2  
SFO 100.626139 MHz  
AQ 0.177023 sec  
RG 3.171923 sec  
RG 150.35  
FIDRES 48.400 usec  
AQ 6.56 usec  
SFO 300.136 MHz  
CHKE 2.00000000 sec  
===== CHANNEL f1 =====  
NUC1 <sup>1</sup>H  
P1 12.00 usec  
PL1 0.00000000 W  
SFO1 500.1360010 MHz  
F2 - Processing parameters  
SI 500.1360000 MHz  
WDW EM  
SSB 0  
LB 0.30 Hz  
GB 0  
PC 1.00

61838-193  
proton\_d MeOD /v zhaiw 23

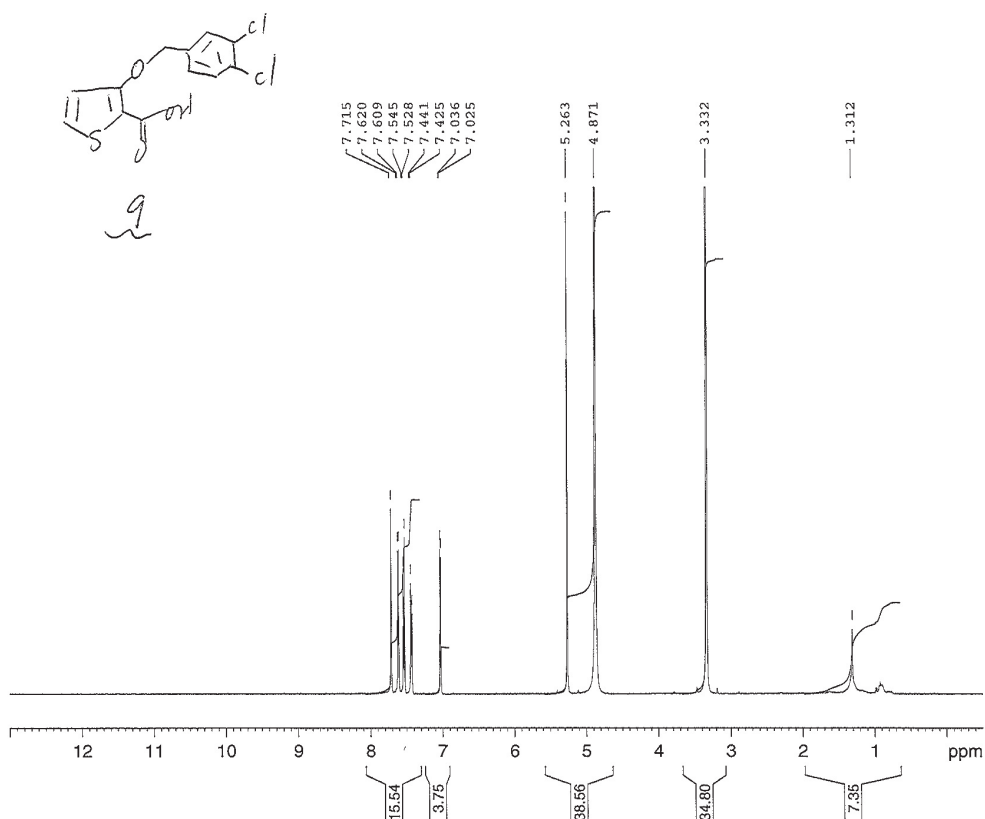

## 65859-015

7/14/2011 10:52:29 AM

|                        |                                                                                 |                      |                                     |                      |                      |
|------------------------|---------------------------------------------------------------------------------|----------------------|-------------------------------------|----------------------|----------------------|
| Acquisition Time (sec) | 2.7329                                                                          | Comment              | 65859-015 proton. d MeOD v zhaiw 64 | Date                 | 27 Mar 2006 09:14:07 |
| Date Stamp             | 27 Mar 2006 09:14:07                                                            |                      |                                     |                      |                      |
| File Name              | \\cruncher.wfd.pri.bms.com\nmread1\JDX2005-2007\ZHAIW\65859-015_10_DPX-300B.JDX |                      |                                     | Frequency (MHz)      | 300.13               |
| Nucleus                | 1H                                                                              | Number of Transients | 16                                  | Origin               | 65859-015            |
| Owner                  | zhaiw                                                                           | Points Count         | 16384                               | Solvent              | METHANOL-d4          |
| Sweep Width (Hz)       | 5995.20                                                                         |                      |                                     | Spectrum Offset (Hz) | 2401.0840            |

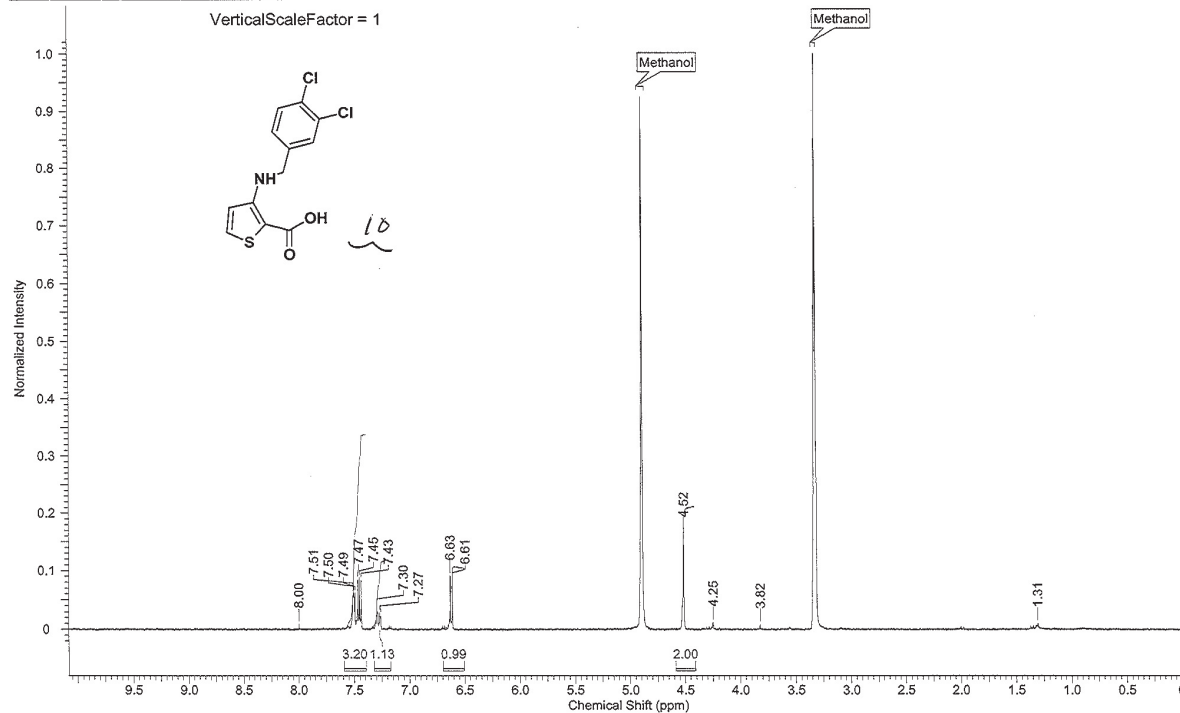

## 61838-196

7/11/2011 10:49:55 AM

|                        |                                                                                |                        |                                     |                      |                      |
|------------------------|--------------------------------------------------------------------------------|------------------------|-------------------------------------|----------------------|----------------------|
| Acquisition Time (sec) | 3.2768                                                                         | Comment                | 61838-196 proton. d MeOD v zhaiw 43 | Date                 | 07 Mar 2006 16:18:35 |
| Date Stamp             | 07 Mar 2006 16:18:35                                                           |                        |                                     |                      |                      |
| File Name              | \\cruncher.wfd.pri.bms.com\nmread1\JDX2005-2007\ZHAIW\61838-196_10_DRX500A.JDX |                        |                                     | Frequency (MHz)      | 500.13               |
| Nucleus                | 1H                                                                             | Number of Transients   | 16                                  | Origin               | 61838-196            |
| Owner                  | zhaiw                                                                          | Points Count           | 32768                               | Solvent              | METHANOL-d4          |
| Sweep Width (Hz)       | 10000.00                                                                       | Temperature (degree C) | 28.160                              | Spectrum Offset (Hz) | 4012.6965            |

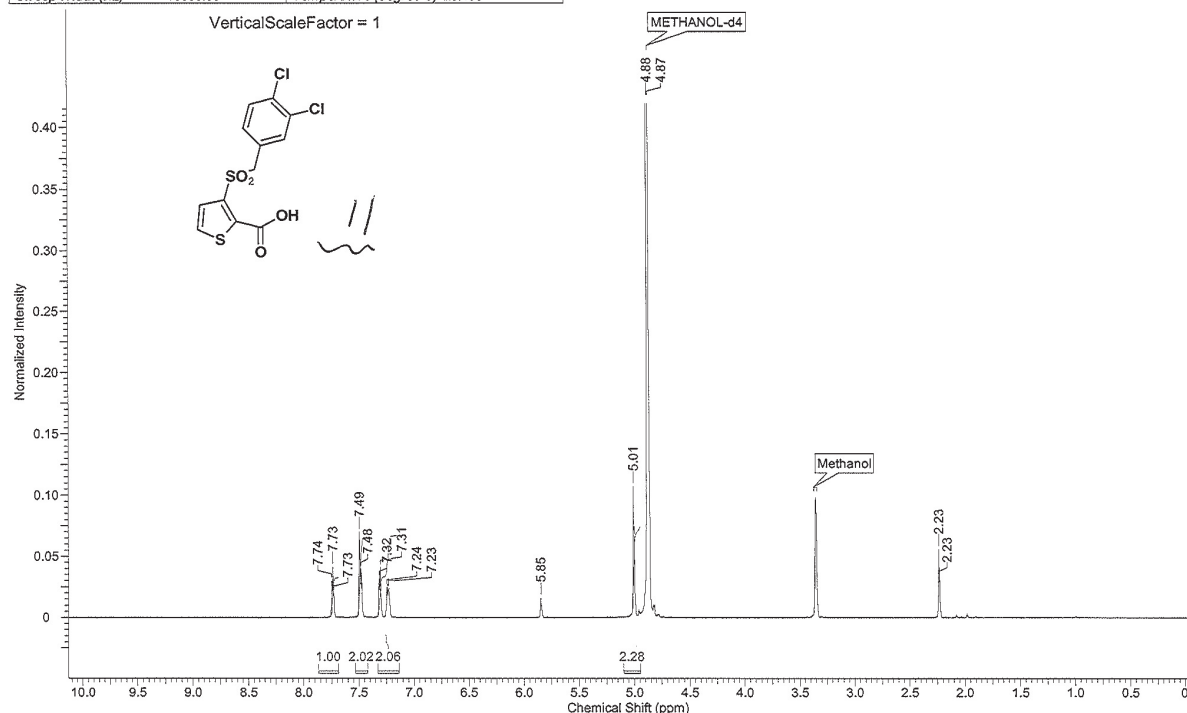

# H-NMR of Compound 12

1/13/2011 2:41:13 PM

|                        |                                                                               |                      |                                     |                       |                      |
|------------------------|-------------------------------------------------------------------------------|----------------------|-------------------------------------|-----------------------|----------------------|
| Acquisition Time (sec) | 2.7329                                                                        | Comment              | 61838-184 proton, d MeOD v zha1w 13 | Date                  | 27 Feb 2006 09:57:04 |
| Date Stamp             | 27 Feb 2006 09:57:04                                                          |                      |                                     |                       |                      |
| File Name              | Verucher.wfd pri.bms.com/nmrread1UDX2005-2007/ZHAWW/61838-184_10_DPX-3008.JDX |                      |                                     | Frequency (MHz)       | 300.13               |
| Nucleus                | <sup>1</sup> H                                                                | Number of Transients | 16                                  | Original Points Count | 16384                |
| Owner                  | zha1w                                                                         | Points Count         | 16384                               | Solvent               | METHANOL-d4          |
| Sweep Width (Hz)       | 6995.20                                                                       |                      |                                     | Spectrum Offset (Hz)  | 2401.8840            |

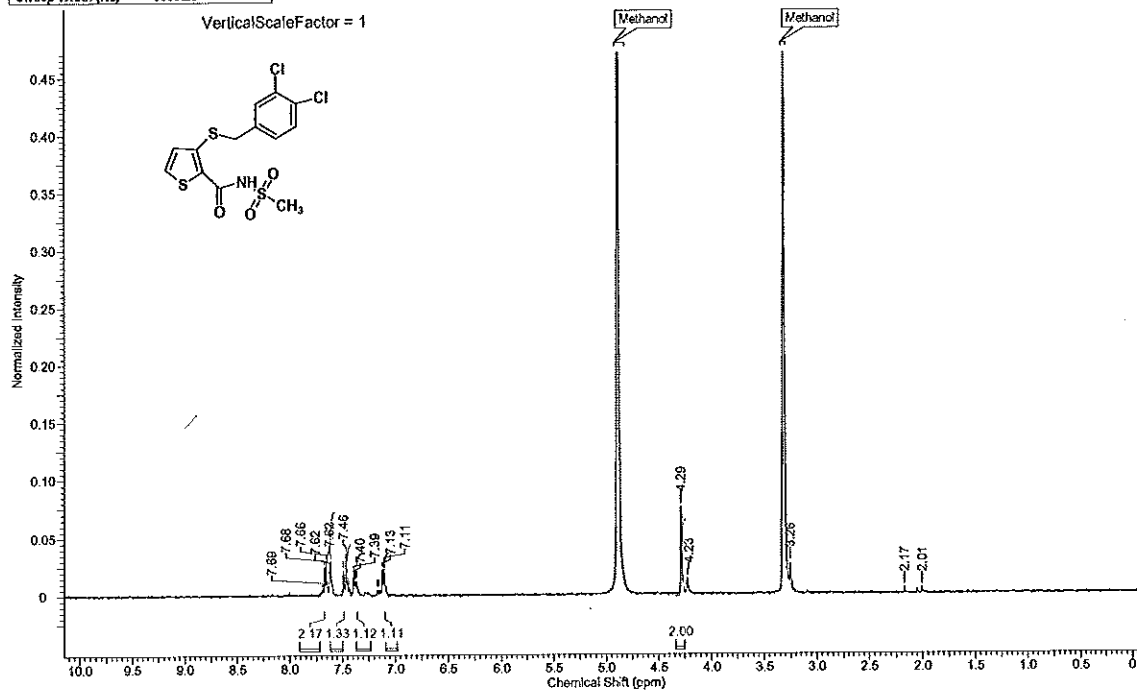

# H-NMR of Compound 13

1/13/2011 2:52:42 PM

|                        |                                                                              |                        |                                     |                      |                      |
|------------------------|------------------------------------------------------------------------------|------------------------|-------------------------------------|----------------------|----------------------|
| Acquisition Time (sec) | 3.2768                                                                       | Comment                | 65859-038 proton_d MeOD y zha'w 116 | Date                 | 11 Apr 2006 15:57:05 |
| Date Stamp             | 11 Apr 2006 15:57:05                                                         |                        |                                     |                      |                      |
| File Name              | Venucher.wfd pr.bms.com/nmrread1/UDX2005-2007/ZHA'W/65859-038_10_DRX500A.JDX |                        |                                     | Frequency (MHz)      | 500.13               |
| Nucleus                | <sup>1</sup> H                                                               | Number of Transients   | 64                                  | Origin               | 65859-038            |
| Owner                  | zha'w                                                                        | Points Count           | 32768                               | Solvent              | METHANOL-d4          |
| Sweep Width (Hz)       | 10000.00                                                                     | Temperature (degree C) | 28.160                              | Spectrum Offset (Hz) | 4001.1123            |

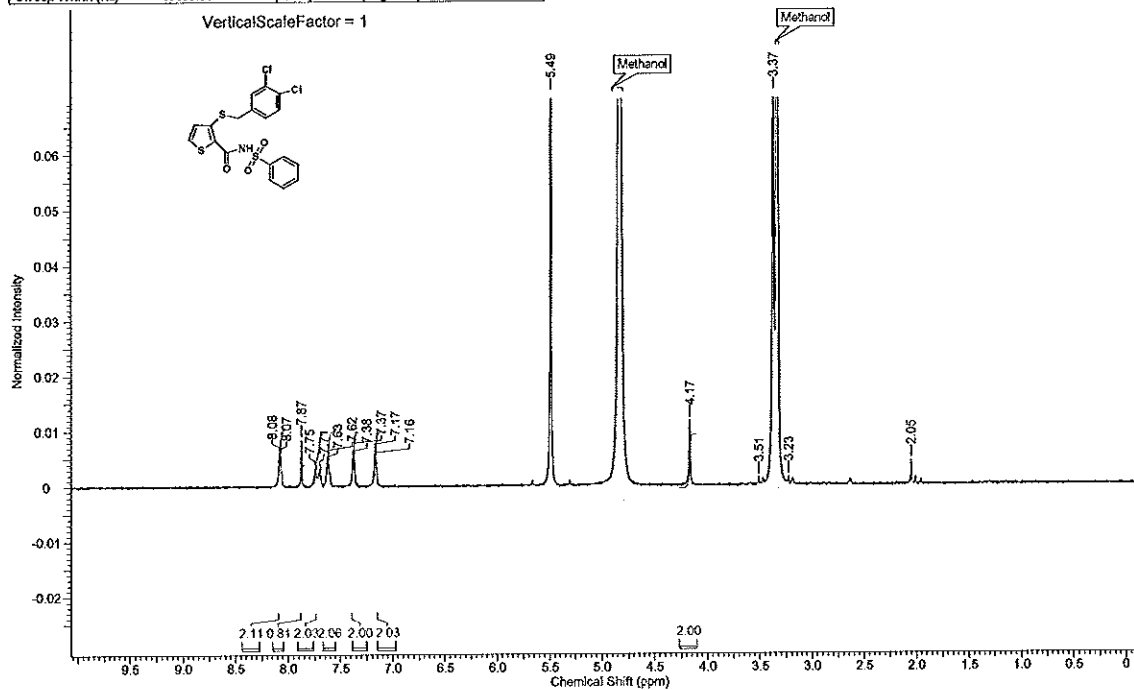



# H-NMR of Compound 14

1/13/2011 2:30:52 PM

|                        |                                                                                  |                        |                                          |                       |                      |
|------------------------|----------------------------------------------------------------------------------|------------------------|------------------------------------------|-----------------------|----------------------|
| Acquisition Time (sec) | 3 2768                                                                           | Comment                | 65859-047-02-6 proton, d MeOD v zha'w 63 | Date                  | 21 Apr 2006 15:56:44 |
| Data Stamp             | 21 Apr 2006 15:56:44                                                             |                        |                                          |                       |                      |
| File Name              | Voruncher.wfd pri bms com\nmread1\VDX2005-2007\ZHAW\65859-047-2-6_20_DRX500A.JDX |                        |                                          | Frequency (MHz)       | 500.13               |
| Nucleus                | <sup>1</sup> H                                                                   | Number of Transients   | 16                                       | Origin                | 65859-047-2-6        |
| Owner                  | zha'w                                                                            | Points Count           | 32768                                    | Solvent               | METHANOL-d4          |
| Sweep Width (Hz)       | 10000.00                                                                         | Temperature (degree C) | 28.160                                   | Original Points Count | 32768                |
|                        |                                                                                  |                        |                                          | Spectrum Offset (Hz)  | 4001.1123            |

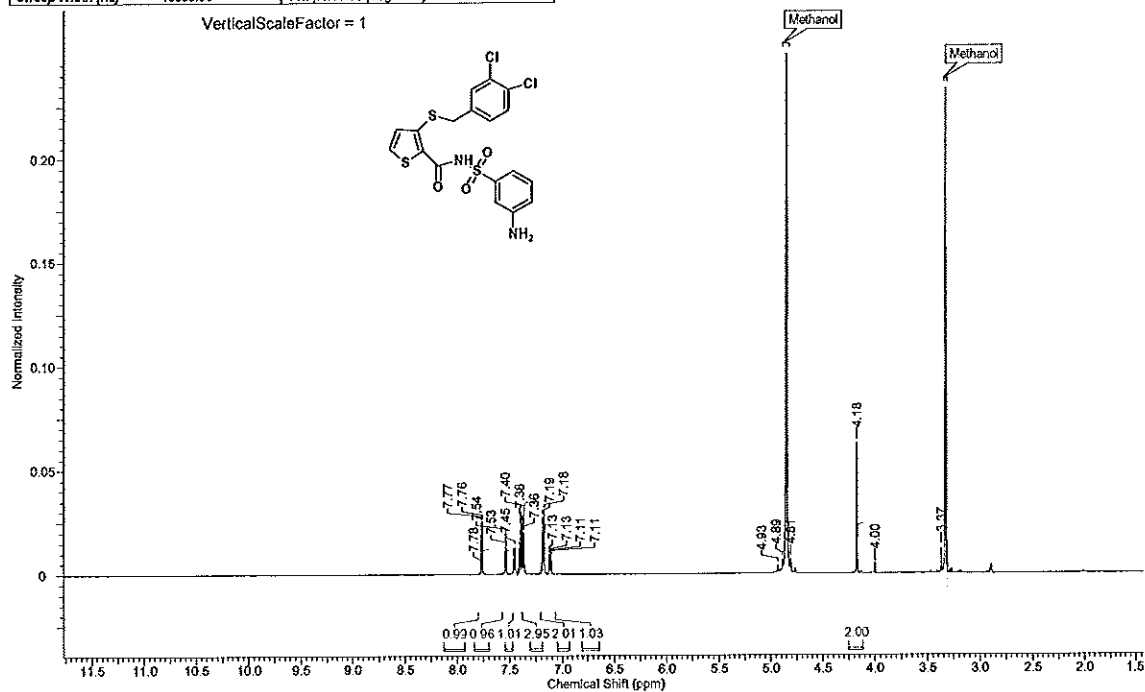

# H-NMR of Compound 15

1/13/2011 3:33:35 PM

|                        |                                                                                   |                        |                                        |                       |                      |
|------------------------|-----------------------------------------------------------------------------------|------------------------|----------------------------------------|-----------------------|----------------------|
| Acquisition Time (sec) | 3.2768                                                                            | Comment                | 65859-070-02 proton, d DMSO v zha/w 62 | Date                  | 19 May 2008 12:37:47 |
| Date Stamp             | 19 May 2008 12:37:47                                                              |                        |                                        |                       |                      |
| File Name              | \\cruncher.wfd.prl.bms.com\innread1\DX2005-2007\ZHA\W\65859-070-02_10_DRX500A.JDX |                        |                                        |                       |                      |
| Nucleus                | <sup>1</sup> H                                                                    | Number of Transients   | 16                                     | Origin                | 65859-070-02         |
| Owner                  | zha/w                                                                             | Points Count           | 32768                                  | Solvent               | DMSO-d6              |
| Sweep Width (Hz)       | 10000.00                                                                          | Temperature (degree C) | 28.160                                 | Frequency (MHz)       | 500.13               |
|                        |                                                                                   |                        |                                        | Original Points Count | 32768                |
|                        |                                                                                   |                        |                                        | Spectrum Offset (Hz)  | 3998.6709            |

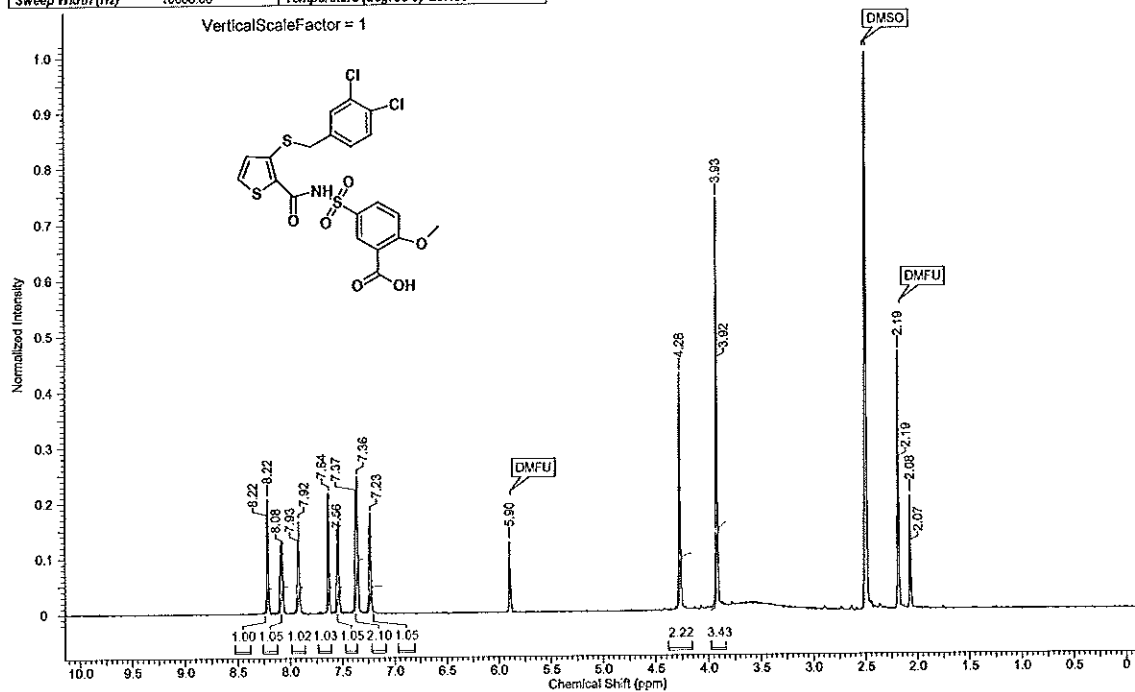

# H-NMR of Compound 16

1/13/2011 3:38:08 PM

|                        |                                                                              |                        |                                       |                      |                      |
|------------------------|------------------------------------------------------------------------------|------------------------|---------------------------------------|----------------------|----------------------|
| Acquisition Time (sec) | 3.2768                                                                       | Comment                | 65859-066-03 proton d MeOD v zha1w 20 | Date                 | 17 May 2006 09:54:15 |
| Date Stamp             | 17 May 2006 09:54:15                                                         |                        |                                       |                      |                      |
| File Name              | Vcruncher.wfd prbms.com/nmrread1UDX2005-2007ZHAJW65859-066-03_20_DRX500A.JDX |                        |                                       | Frequency (MHz)      | 500.13               |
| Nucleus                | <sup>1</sup> H                                                               | Number of Transients   | 16                                    | Origin               | 65859-066-03         |
| Owner                  | zha1w                                                                        | Points Count           | 32768                                 | Solvent              | METHANOL-d4          |
| Sweep Width (Hz)       | 10000.00                                                                     | Temperature (degree C) | 28.160                                | Spectrum Offset (Hz) | 4001.1123            |

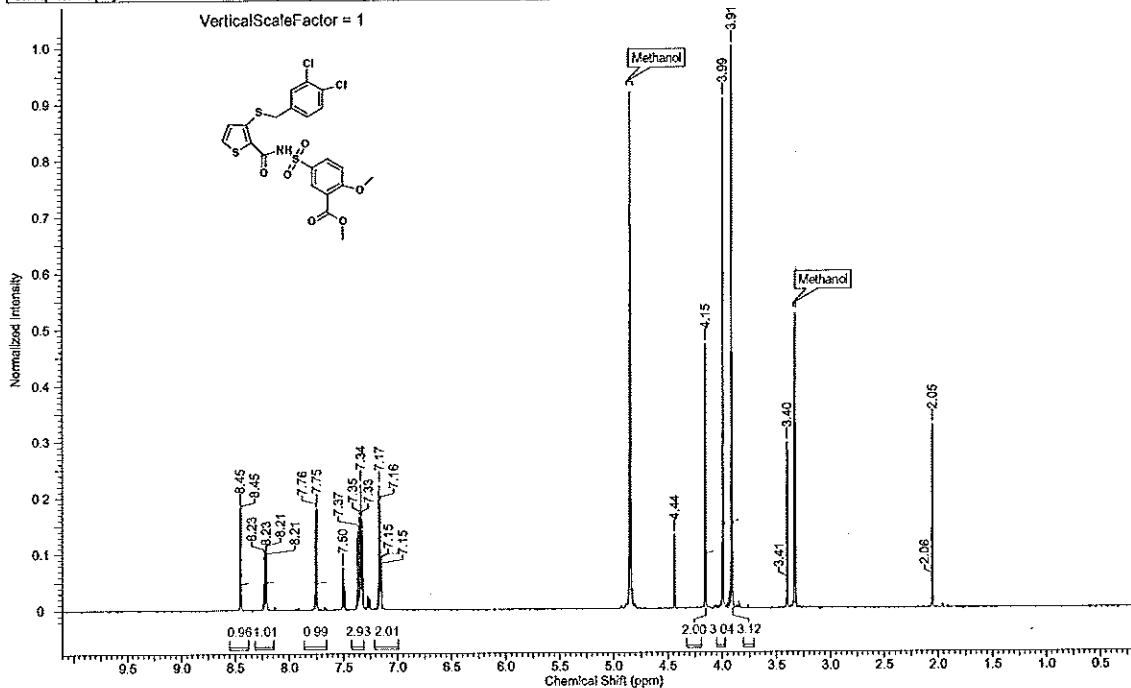

# H-NMR of Compound 17

1/13/2011 3:43:06 PM

|                        |                                                                                   |                      |                                    |                      |                      |
|------------------------|-----------------------------------------------------------------------------------|----------------------|------------------------------------|----------------------|----------------------|
| Acquisition Time (sec) | 2.7329                                                                            | Comment              | 61839-183 proton_d MeOD v zha1w 16 | Date                 | 27 Feb 2006 10:25:23 |
| Date Stamp             | 27 Feb 2006 10:25:23                                                              |                      |                                    |                      |                      |
| File Name              | \\cruncher.wfd.prl.bms.com\nmrread\1UDX2005-2007\ZHAI\WV61839-183_10_DPX-300B.JDX |                      |                                    | Frequency (MHz)      | 300.13               |
| Nucleus                | 1H                                                                                | Number of Transients | 16                                 | Origin               | 61839-183            |
| Owner                  | zha1w                                                                             | Points Count         | 16384                              | Solvent              | METHANOL-d4          |
| Sweep Width (Hz)       | 5995.20                                                                           |                      |                                    | Spectrum Offset (Hz) | 2401.0340            |

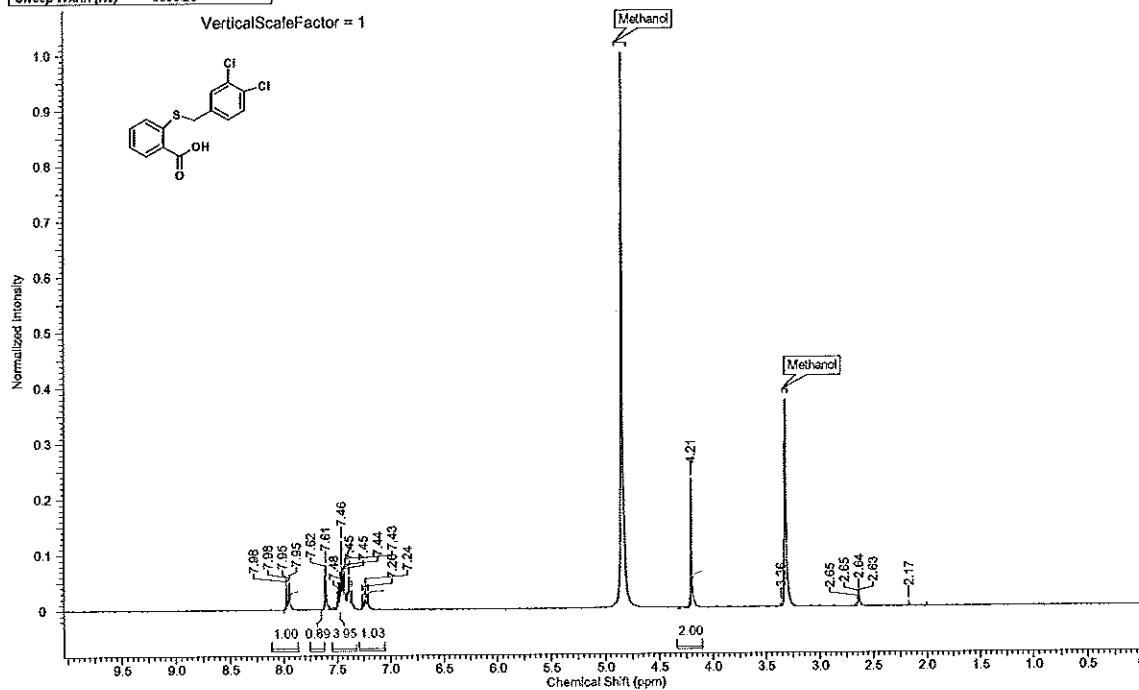

# H-NMR of Compound 18

1/13/2011 3:57:46 PM

|                        |                                                                                 |                        |                                      |                      |                      |
|------------------------|---------------------------------------------------------------------------------|------------------------|--------------------------------------|----------------------|----------------------|
| Acquisition Time (sec) | 3.2768                                                                          | Comment                | 65859-061-01 proton_d DMSO v zha1w80 | Date                 | 11 May 2008 14:42:08 |
| Date Stamp             | 11 May 2008 14:42:08                                                            |                        |                                      |                      |                      |
| File Name              | voruncher.wfd.pr.bms.com/tomread1UDX2005-2007VZHA1W155859-061-01_10.DRX500A.JDX |                        |                                      | Frequency (MHz)      | 500.13               |
| Nucleus                | <sup>1</sup> H                                                                  | Number of Transients   | 16                                   | Origin               | 65859-061-01         |
| Owner                  | zha1w                                                                           | Points Count           | 32768                                | Solvent              | DMSO-d6              |
| Sweep Width (Hz)       | 10000.00                                                                        | Temperature (degree C) | 28.160                               | Spectrum Offset (Hz) | 3927.7639            |

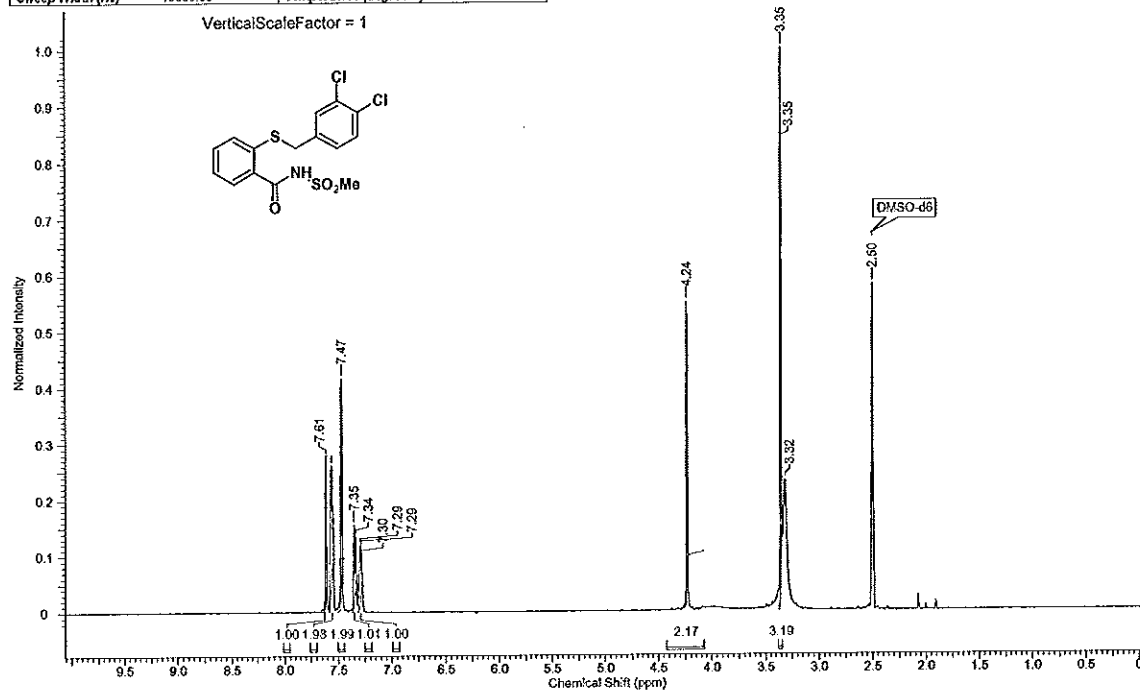

# H-NMR of Compound 19

1/13/2011 4:16:08 PM

|                        |                      |                      |                                                                                 |                      |                      |
|------------------------|----------------------|----------------------|---------------------------------------------------------------------------------|----------------------|----------------------|
| Acquisition Time (sec) | 2.7329               | Comment              | 65859-119 proton_d MeOD v zhaW 78                                               | Date                 | 14 Jul 2006 11:24:15 |
| Date Stamp             | 14 Jul 2006 11:24:15 | File Name            | Venricher.wfd pri bms.com\rmread\1\NDX2005-2007\ZHA\W\65859-119_19_DPX-300B.JDX | Frequency (MHz)      | 300.13               |
| Nucleus                | <sup>1</sup> H       | Number of Transients | 16                                                                              | Origin               | 65859-119            |
| Owner                  | zhaW                 | Points Count         | 16384                                                                           | Solvent              | METHANOL-d4          |
| Sweep Width (Hz)       | 6995.20              |                      |                                                                                 | Spectrum Offset (Hz) | 2401.0840            |

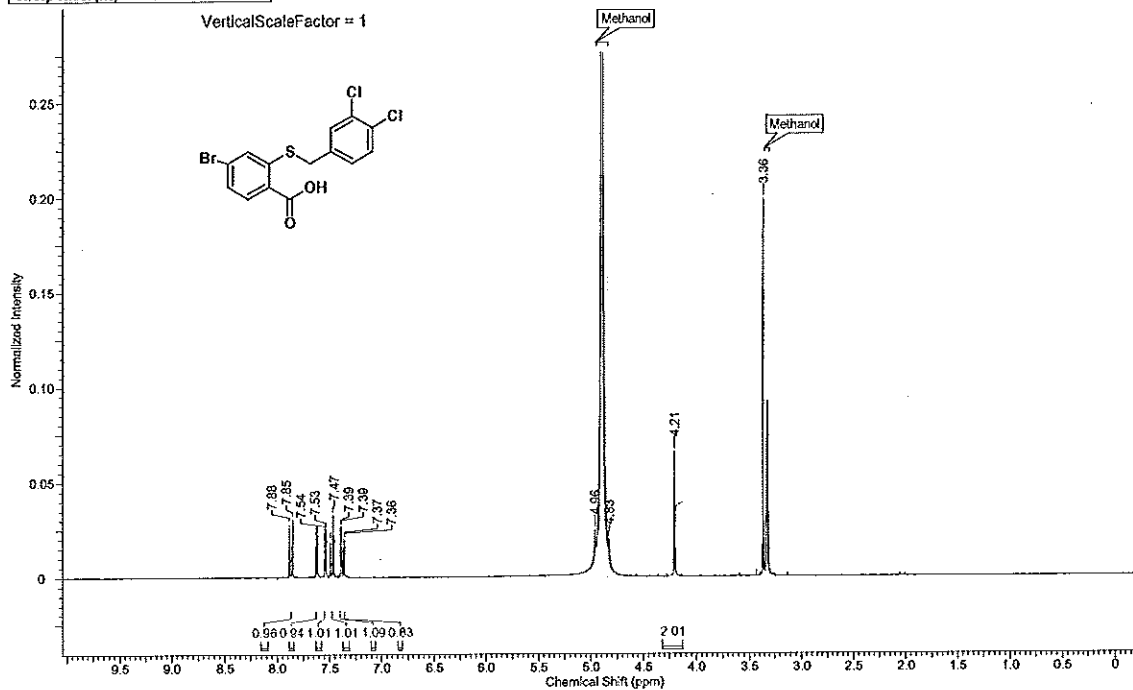

# H-NMR of Compound 20

1/13/2011 4:20:24 PM

|                        |                                                                                   |                      |                                       |                       |                      |
|------------------------|-----------------------------------------------------------------------------------|----------------------|---------------------------------------|-----------------------|----------------------|
| Acquisition Time (sec) | 2.7329                                                                            | Comment              | 65859-187-02 proton d MeOD v zha'w 78 | Date                  | 05 Oct 2006 13:13:39 |
| Date Stamp             | 05 Oct 2006 13:13:30                                                              |                      |                                       |                       |                      |
| File Name              | W:\nchrer.wfd.pri.bms.com\rmread\UDX2005-2007\ZHAI\W\65859-187-02_10_DPX-300B.JDX |                      |                                       | Frequency (MHz)       | 300.13               |
| Nucleus                | <sup>1</sup> H                                                                    | Number of Transients | 80                                    | Origin                | 65859-187-02         |
| Owner                  | zha'w                                                                             | Points Count         | 16384                                 | Solvent               | METHANOL-d4          |
| Sweep Width (Hz)       | 5995.20                                                                           |                      |                                       | Original Points Count | 16384                |
|                        |                                                                                   |                      |                                       | Spectrum Offset (Hz)  | 2491.0840            |

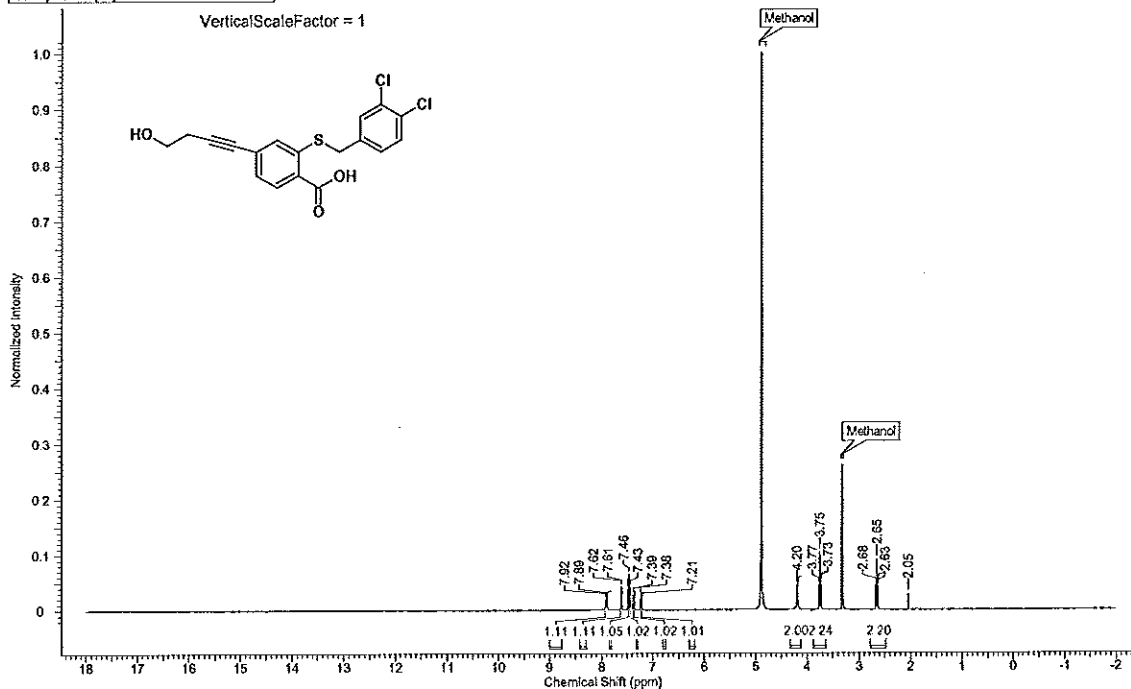

# 1H-NMR of Compound 21

1/11/2011 4:44:10 PM

|                               |                                                                               |                               |                                       |
|-------------------------------|-------------------------------------------------------------------------------|-------------------------------|---------------------------------------|
| <b>Formula</b>                | C <sub>22</sub> H <sub>18</sub> Cl <sub>2</sub> NO <sub>2</sub> S             | <b>FW</b>                     | 428.3310                              |
| <b>Acquisition Time (sec)</b> | 3.9847                                                                        | <b>Comment</b>                | 86453-003 proton_d np DMSO /v zhus 57 |
| <b>Date</b>                   | 06 Apr 2010 16:48:17                                                          | <b>Date Stamp</b>             | 06 Apr 2010 16:48:17                  |
| <b>File Name</b>              | \\CRUNCHER.WFD.PRJ.BMS.COM\NMR\READ1\JDX2008-2010\zhus\86453-003_10_AV400.jdx |                               |                                       |
| <b>Frequency (MHz)</b>        | 400.13                                                                        | <b>Nucleus</b>                | 1H                                    |
| <b>Origin</b>                 | 86453-003                                                                     | <b>Original Points Count</b>  | 32768                                 |
| <b>Points Count</b>           | 32768                                                                         | <b>Solvent</b>                | DMSO-d6                               |
| <b>Sweep Width (Hz)</b>       | 8223.43                                                                       | <b>Temperature (degree C)</b> | 27.000                                |
|                               |                                                                               | <b>Number of Transients</b>   | 64                                    |
|                               |                                                                               | <b>Owner</b>                  | zhus                                  |
|                               |                                                                               | <b>Spectrum Offset (Hz)</b>   | 3197.9250                             |

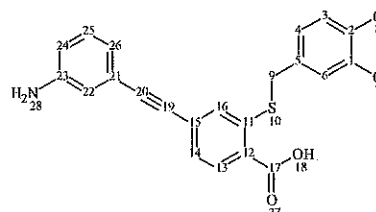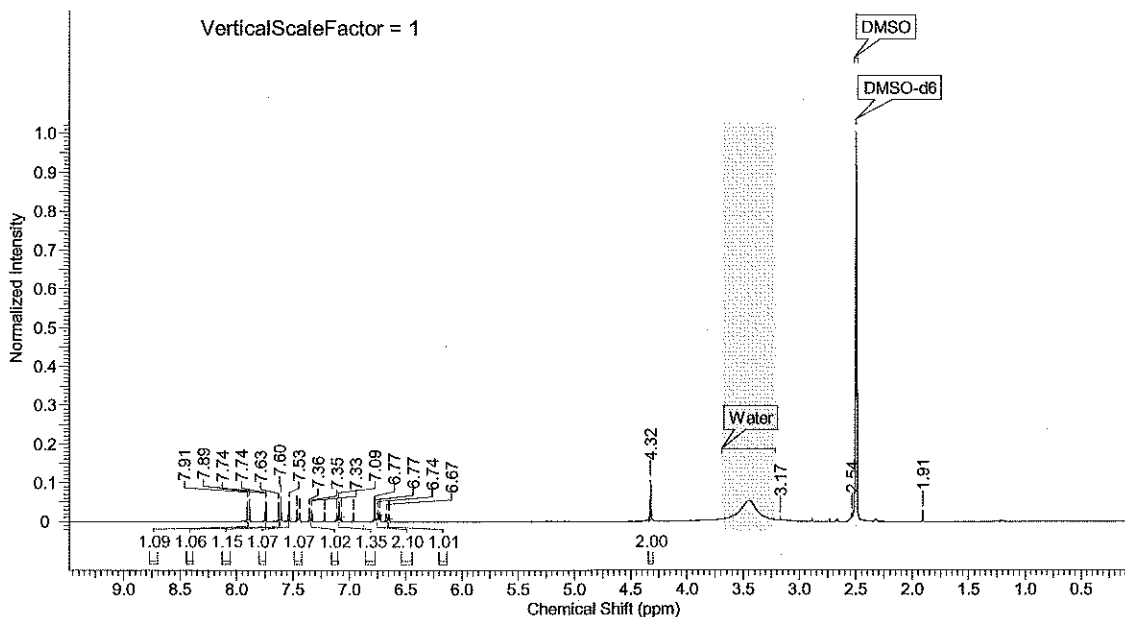



# 1H-NMR of Compound 21

1/11/2011 4:47:18 PM

|                               |                                                                               |                               |                                       |
|-------------------------------|-------------------------------------------------------------------------------|-------------------------------|---------------------------------------|
| <b>Formula</b>                | C <sub>22</sub> H <sub>16</sub> Cl <sub>2</sub> NO <sub>2</sub> S             | <b>FW</b>                     | 428.3310                              |
| <b>Acquisition Time (sec)</b> | 3.9847                                                                        | <b>Comment</b>                | 86453-003 proton_d_np DMSO /v zhus 57 |
| <b>Date</b>                   | 06 Apr 2010 16:48:17                                                          | <b>Date Stamp</b>             | 06 Apr 2010 16:48:17                  |
| <b>File Name</b>              | \\CRUNCHER.WFD.PRI.BMS.COM\NMR\READ1\JDX2008-2010\zhus\86453-003_10_AV400.jdx |                               |                                       |
| <b>Frequency (MHz)</b>        | 400.13                                                                        | <b>Nucleus</b>                | 1H                                    |
| <b>Origin</b>                 | 86453-003                                                                     | <b>Original Points Count</b>  | 32768                                 |
| <b>Points Count</b>           | 32768                                                                         | <b>Solvent</b>                | DMSO-d6                               |
| <b>Sweep Width (Hz)</b>       | 8223.43                                                                       | <b>Temperature (degree C)</b> | 27.000                                |
|                               |                                                                               | <b>Number of Transients</b>   | 64                                    |
|                               |                                                                               | <b>Owner</b>                  | zhus                                  |
|                               |                                                                               | <b>Spectrum Offset (Hz)</b>   | 3197.9250                             |

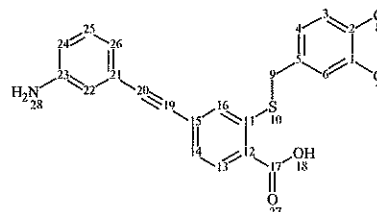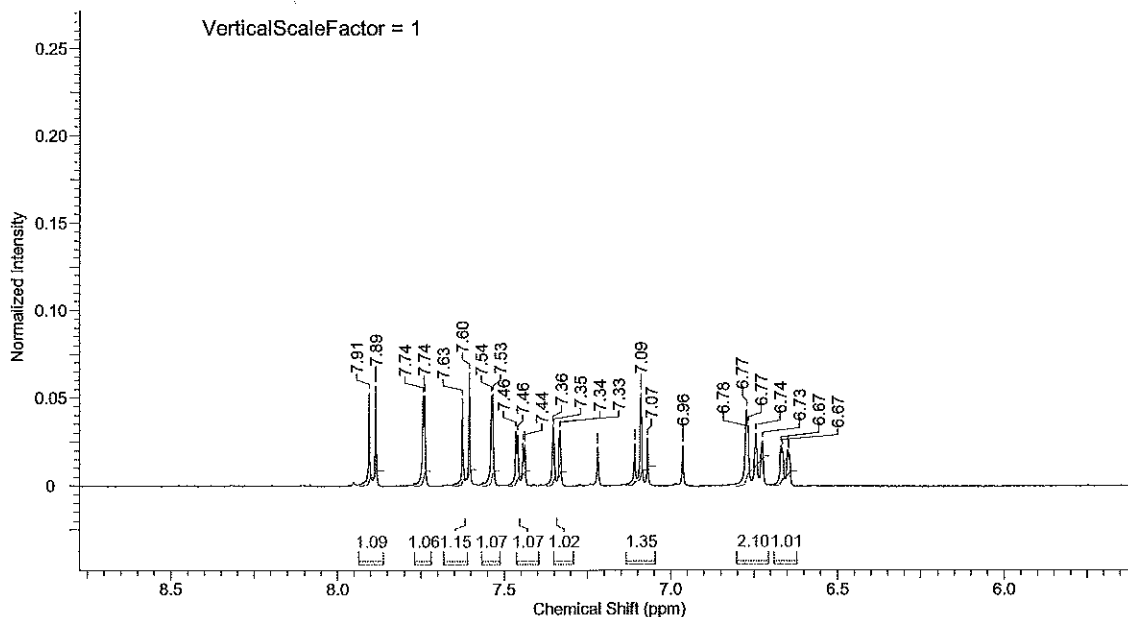

# 1H-NMR of Compound 22

1/11/2011 11:40:48 AM

|                                                                                         |                      |                        |                      |
|-----------------------------------------------------------------------------------------|----------------------|------------------------|----------------------|
| Formula C <sub>24</sub> H <sub>18</sub> Cl <sub>2</sub> N <sub>2</sub> O <sub>3</sub> S |                      | FW 485.3823            |                      |
| Acquisition Time (sec)                                                                  | 3.9847               | Comment                |                      |
| Date                                                                                    | 17 Apr 2010 13:30:58 | Date Stamp             | 17 Apr 2010 13:30:58 |
| File Name                                                                               |                      |                        |                      |
| Frequency (MHz)                                                                         | 400.13               | Nucleus                | 1H                   |
| Origin                                                                                  |                      | Original Points Count  | 32768                |
| Points Count                                                                            | 32768                | Solvent                | METHANOL-d4          |
| Sweep Width (Hz)                                                                        | 8223.43              | Temperature (degree C) | 27.000               |
|                                                                                         |                      | Number of Transients   | 128                  |
|                                                                                         |                      | Owner                  | zhush                |
|                                                                                         |                      | Spectrum Offset (Hz)   | 3193.2664            |

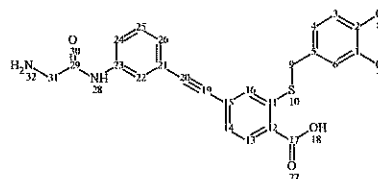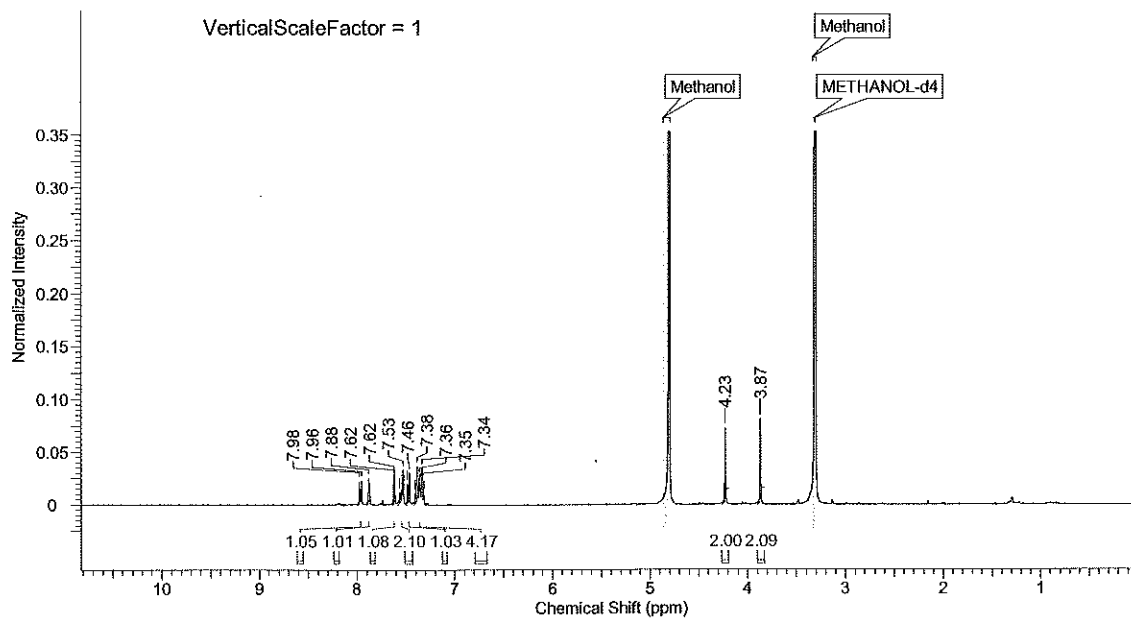

# 1H-NMR of Compound 22

1/11/2011 11:46:32 AM

|                                                                                         |                      |                        |                      |
|-----------------------------------------------------------------------------------------|----------------------|------------------------|----------------------|
| Formula C <sub>24</sub> H <sub>15</sub> Cl <sub>2</sub> N <sub>2</sub> O <sub>3</sub> S |                      | FW 485.3823            |                      |
| Acquisition Time (sec)                                                                  | 3.9847               | Comment                |                      |
| Date                                                                                    | 17 Apr 2010 13:30:58 | Date Stamp             | 17 Apr 2010 13:30:58 |
| File Name                                                                               |                      |                        |                      |
| Frequency (MHz)                                                                         | 400.13               | Nucleus                | 1H                   |
| Origin                                                                                  |                      | Original Points Count  | 32768                |
| Points Count                                                                            | 32768                | Solvent                | METHANOL-d4          |
| Sweep Width (Hz)                                                                        | 8223.43              | Temperature (degree C) | 27.000               |
|                                                                                         |                      | Number of Transients   | 128                  |
|                                                                                         |                      | Owner                  | zhus                 |
|                                                                                         |                      | Spectrum Offset (Hz)   | 3193.2664            |

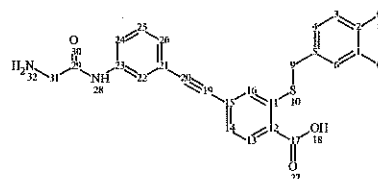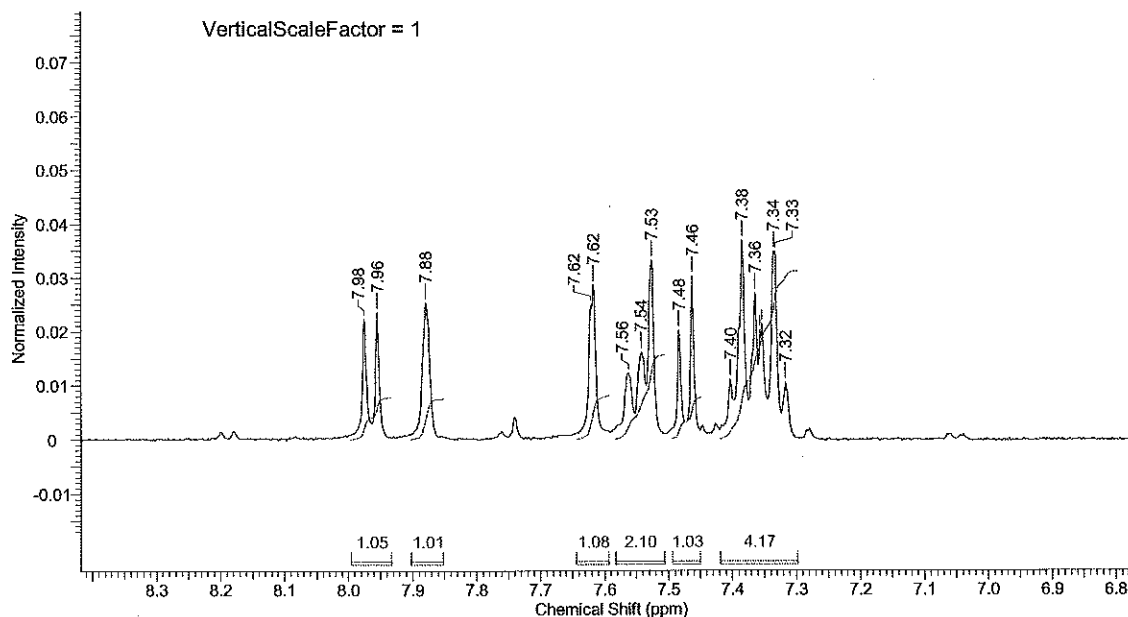

# H-NMR of Compound 23

1/13/2011 4:31:48 PM

|                        |                                                                                   |                      |                                        |                      |                      |
|------------------------|-----------------------------------------------------------------------------------|----------------------|----------------------------------------|----------------------|----------------------|
| Acquisition Time (sec) | 2.7329                                                                            | Comment              | 66596-031-05 proton, d DMSO v zha'w 38 | Date                 | 12 Jan 2007 14:36:37 |
| Date Stamp             | 12 Jan 2007 14:36:37                                                              |                      |                                        |                      |                      |
| File Name              | Voruncher.wfd.prl.bms.com\rmread1\UDX2005-2007\ZHA\W\66596-031-05_10_DPX-3008.JDX |                      |                                        | Frequency (MHz)      | 300.13               |
| Nucleus                | <sup>1</sup> H                                                                    | Number of Transients | 80                                     | Origin               | 66596-031-05         |
| Owner                  | zha'w                                                                             | Points Count         | 16384                                  | Solvent              | DMSO-d6              |
| Sweep Width (Hz)       | 6995.20                                                                           |                      |                                        | Spectrum Offset (Hz) | 2398.6438            |

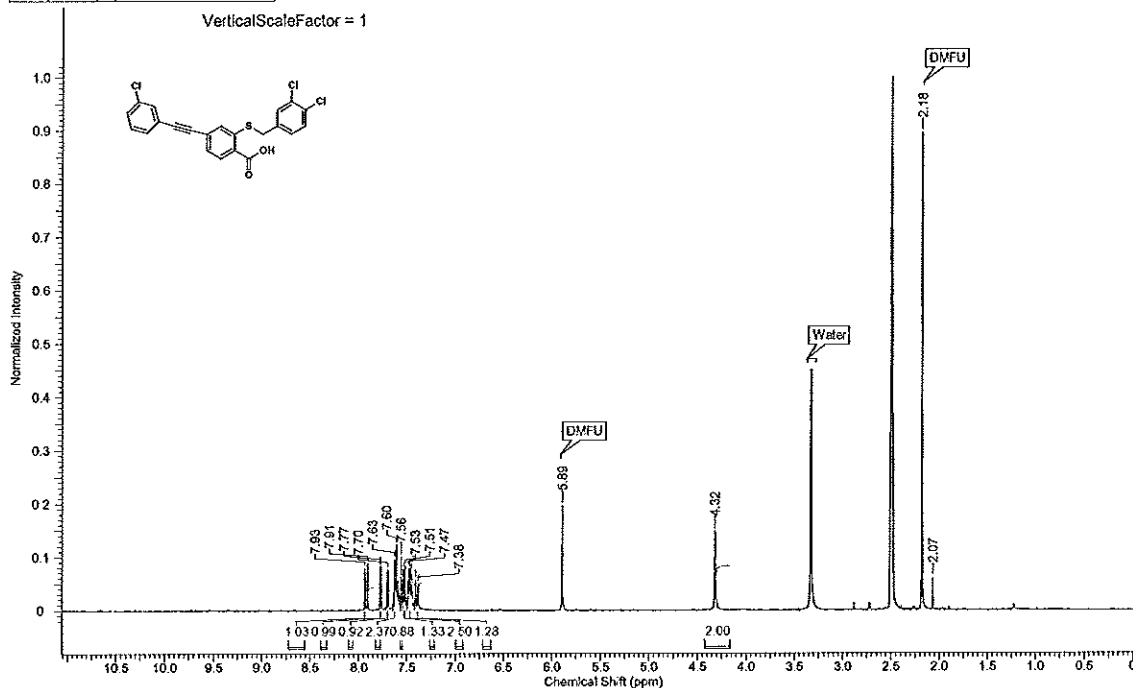

# Analytical HPLC Report

File: =  
 c:\shimadzu\data\public\weixu.zhai\20110713\2011\_0713\_1602-047.dat  
 Sample ID: = 61838-143-01  
 Acquired: = 7/13/2011 4:07:10 PM  
 File = 2011\_0713\_1602.047  
 User = weixu.zhai  
 Instrument = WFD-409D-LCMS3  
 Well = 188 Inj. Vol. = 3 uL  
 Start % B = 0  
 Final % B = 100  
 Gradient Time = 2 min  
 Flow Rate = 1 ml/min  
 Wavelength = 220  
 Solvent Pair = Water/ Acetonitrile/ 0.1%TFA  
 Solvent A = 90% Water/ 10% Acetonitrile/ 0.1%TFA  
 Solvent B = 10% Water/ 90% Acetonitrile/ 0.1%TFA  
 Column 1 = 1.) Phenomenex LUNA C18, 30x2, 3u  
 MW1 = 132+  
 Oven Temp. = 40

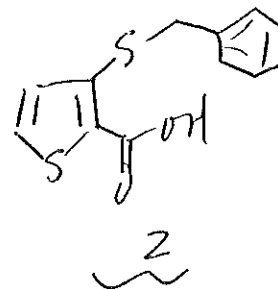

61838-143-01

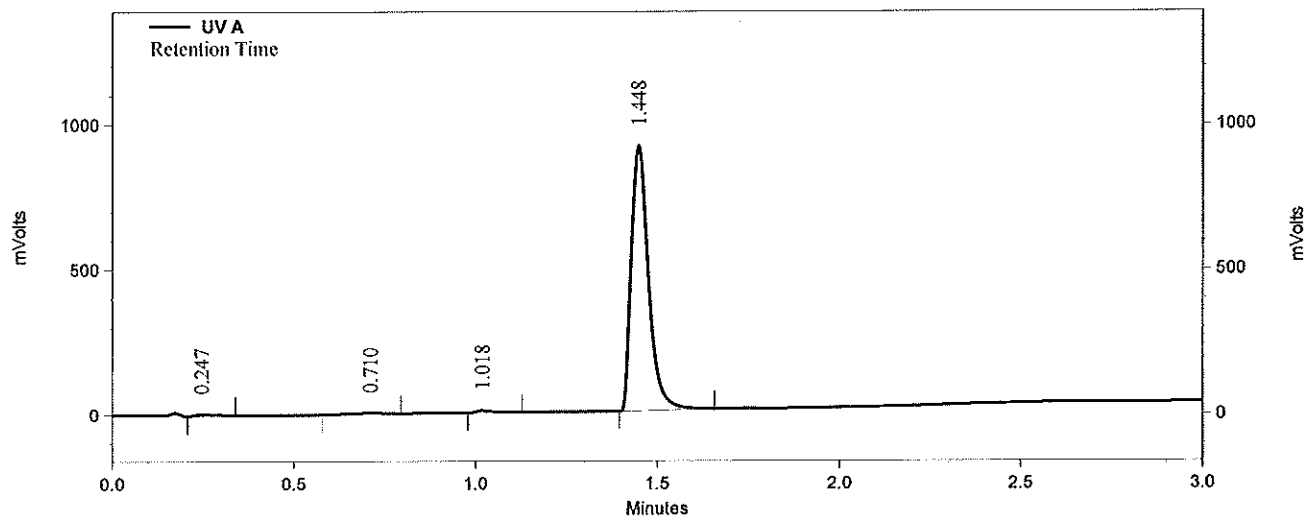

## UV A Results

| Pk # | RT    | Area    | Area % | Height (uV) | Plates |
|------|-------|---------|--------|-------------|--------|
| 1    | 0.247 | 22096   | 0.726  | 5815        | 94     |
| 2    | 0.710 | 20783   | 0.682  | 2891        | 239    |
| 3    | 1.018 | 22402   | 0.736  | 7747        | 3082   |
| 4    | 1.448 | 2980064 | 97.856 | 911696      | 4774   |

|        |  |         |         |        |  |
|--------|--|---------|---------|--------|--|
| Totals |  | 3045345 | 100.000 | 928149 |  |
|--------|--|---------|---------|--------|--|

Sample: 1

Vial: 1:A, 1

ID: 61838-143-01

File: 2011\_0713\_1602-047

Date: 13-Jul-2011

Time: 16:04:04

Description:

Printed: Wed Jul 13 16:11:13 2011

## Sample Report:

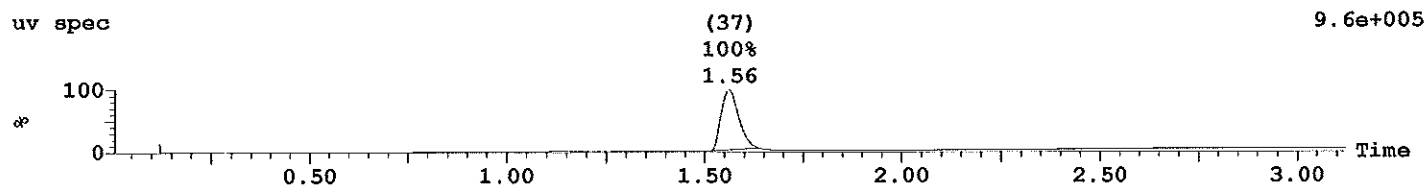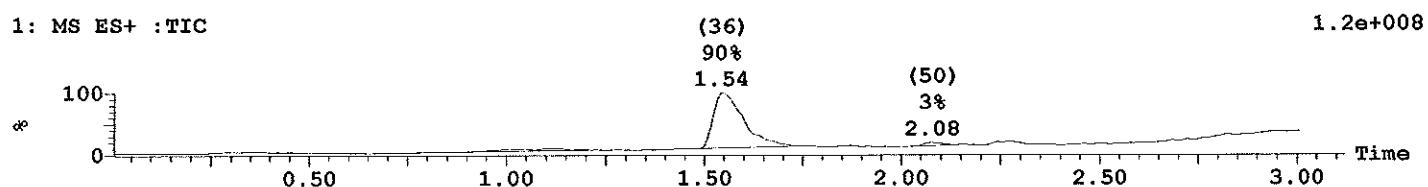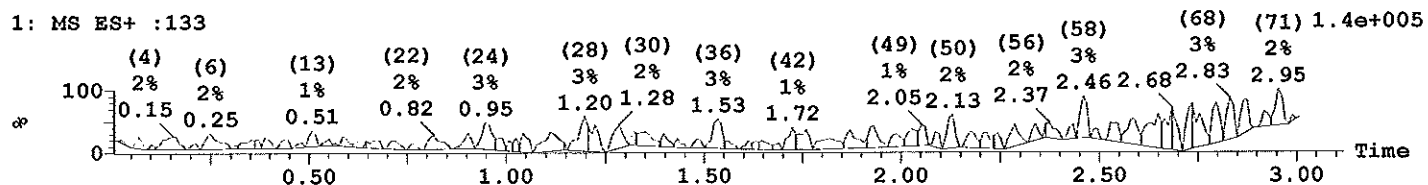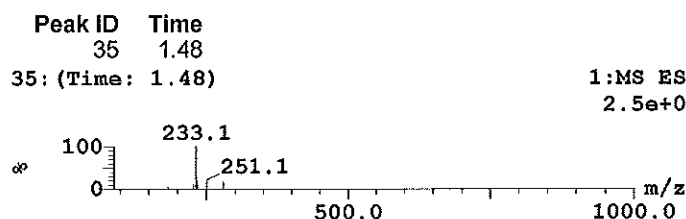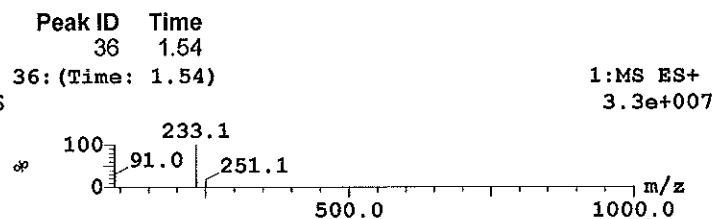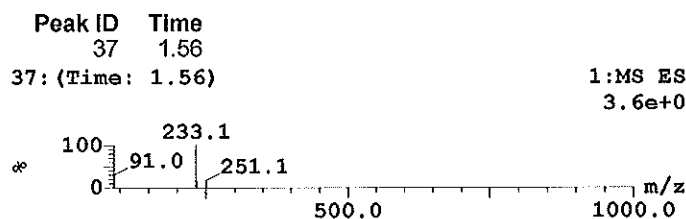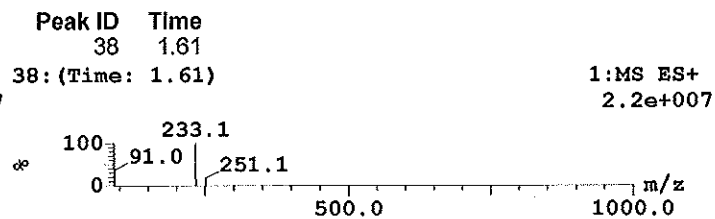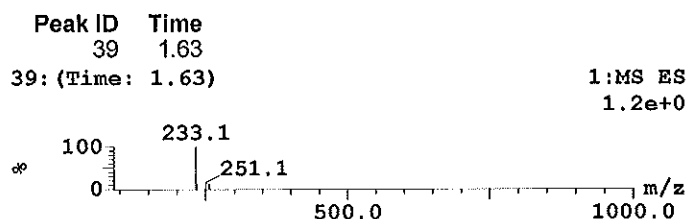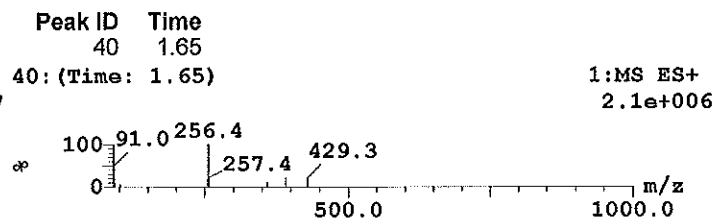

# Analytical HPLC Report

File: =  
 c:\shimadzu\data\public\weixu.zhai\20110713\2011\_0713\_1611-048.dat  
 Sample ID: = 61838-143-13  
 Acquired: = 7/13/2011 4:15:07 PM  
 File = 2011\_0713\_1611.048  
 User = weixu.zhai  
 Instrument = WFD-409D-LCMS3  
 Well = 189 Inj. Vol. = 3 uL  
 Start % B = 0  
 Final % B = 100  
 Gradient Time = 2 min  
 Flow Rate = 1 ml/min  
 Wavelength = 220  
 Solvent Pair = Water/ Acetonitrile/ 0.1%TFA  
 Solvent A = 90% Water/ 10% Acetonitrile/ 0.1%TFA  
 Solvent B = 10% Water/ 90% Acetonitrile/ 0.1%TFA  
 Column 1 = 1.) Phenomenex LUNA C18, 30x2, 3u  
 MWl = 132+  
 Oven Temp. = 40

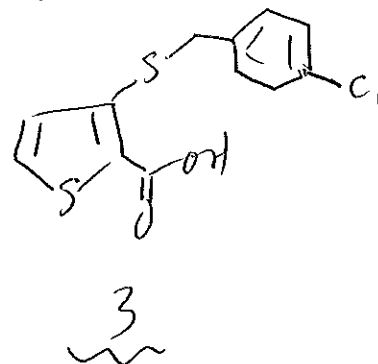

61838-143-13

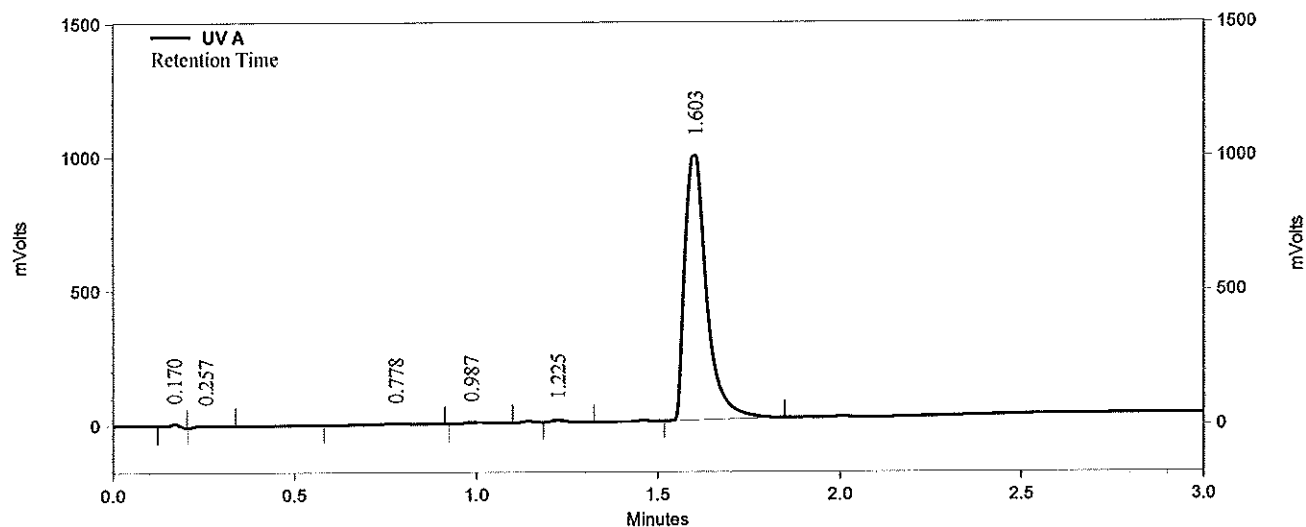

## UV A Results

| Pk # | RT    | Area    | Area % | Height (uV) | Plates |
|------|-------|---------|--------|-------------|--------|
| 1    | 0.170 | 21287   | 0.505  | 10984       | 191    |
| 2    | 0.257 | 23439   | 0.556  | 5135        | 72     |
| 3    | 0.778 | 31205   | 0.741  | 3015        | 132    |
| 4    | 0.987 | 24962   | 0.593  | 5516        | 886    |
| 5    | 1.225 | 23775   | 0.564  | 8112        | 4519   |
| 6    | 1.603 | 4087587 | 97.040 | 982329      | 4147   |

|        |  |         |         |         |  |
|--------|--|---------|---------|---------|--|
| Totals |  | 4212255 | 100.000 | 1015091 |  |
|--------|--|---------|---------|---------|--|

Sample: 1

Vial: 1:A,1

ID: 61838-143-13

File: 2011\_0713\_1611-048

Date: 13-Jul-2011

Time: 16:12:01

Description:

Printed: Wed Jul 13 16:18:56 2011

## Sample Report:

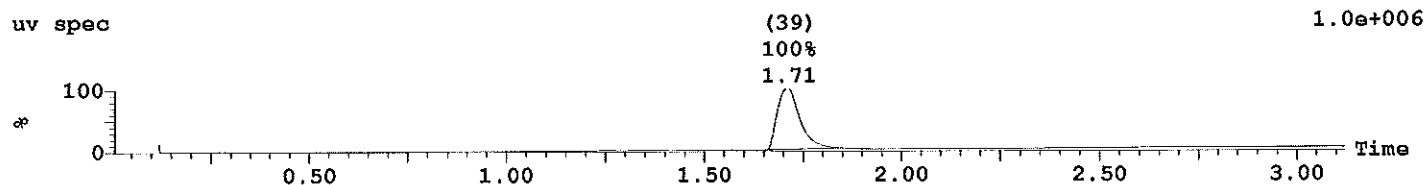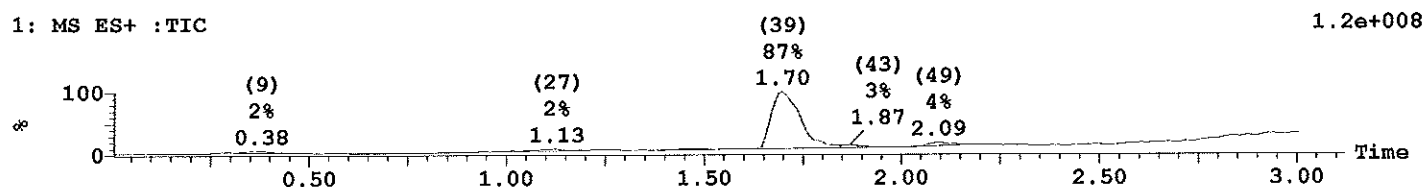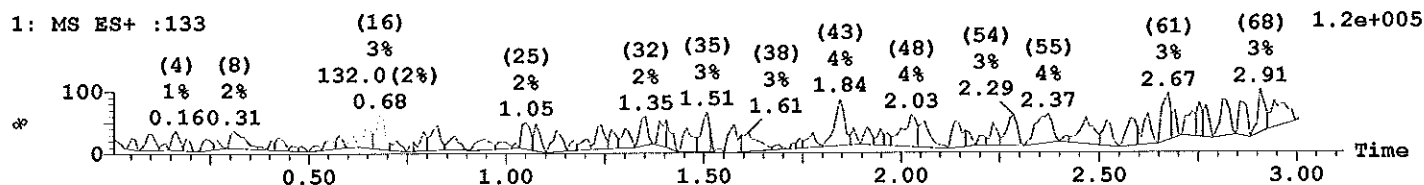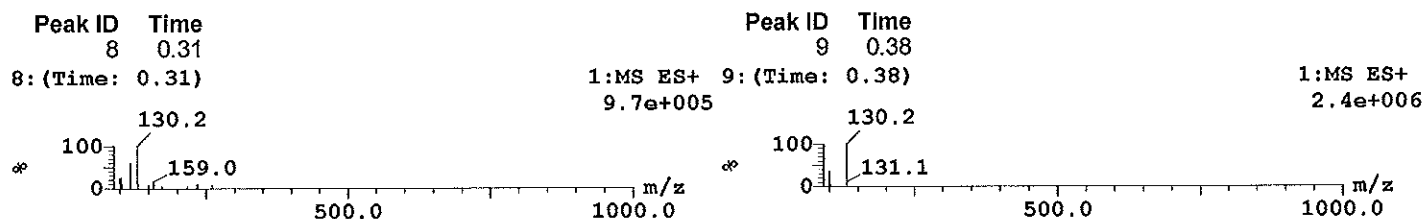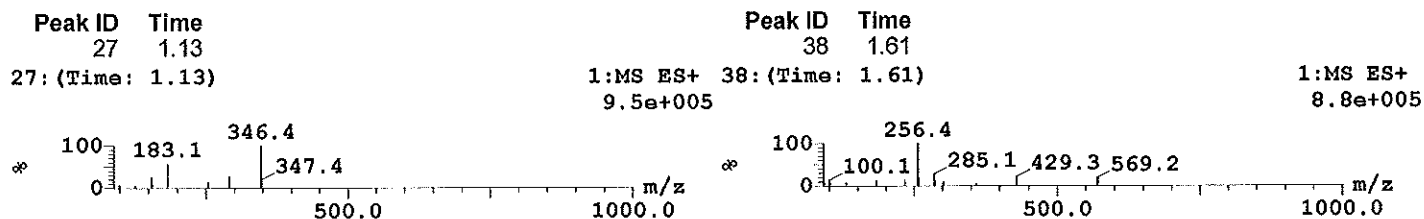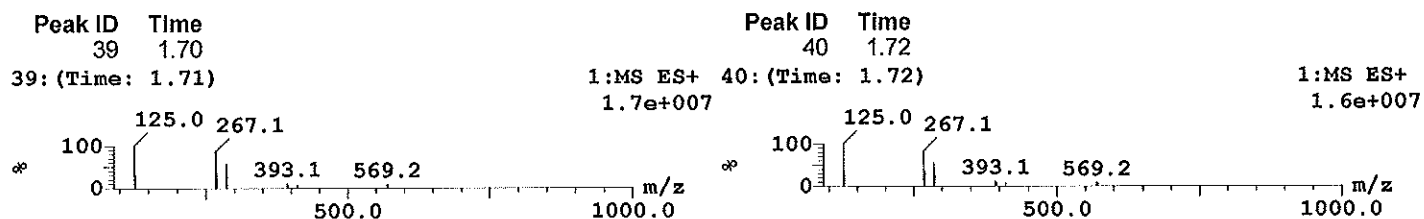



# Analytical HPLC Report

File: =  
 c:\shimadzu\data\public\weixu.zhai\20110713\2011\_0713\_1619-049.dat  
 Sample ID: = 61838-143-08  
 Acquired: = 7/13/2011 4:22:47 PM  
 File = 2011\_0713\_1619.049  
 User = weixu.zhai  
 Instrument = WFD-409D-LCMS3  
 Well = 190 Inj. Vol. = 3 uL  
 Start % B = 0  
 Final % B = 100  
 Gradient Time = 2 min  
 Flow Rate = 1 ml/min  
 Wavelength = 220  
 Solvent Pair = Water/ Acetonitrile/ 0.1%TFA  
 Solvent A = 90% Water/ 10% Acetonitrile/ 0.1%TFA  
 Solvent B = 10% Water/ 90% Acetonitrile/ 0.1%TFA  
 Column 1 = 1.) Phenomenex LUNA C18, 30x2, 3u  
 MW1 = 132+  
 Oven Temp. = 40

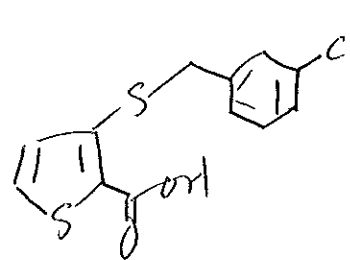

4

61838-143-08

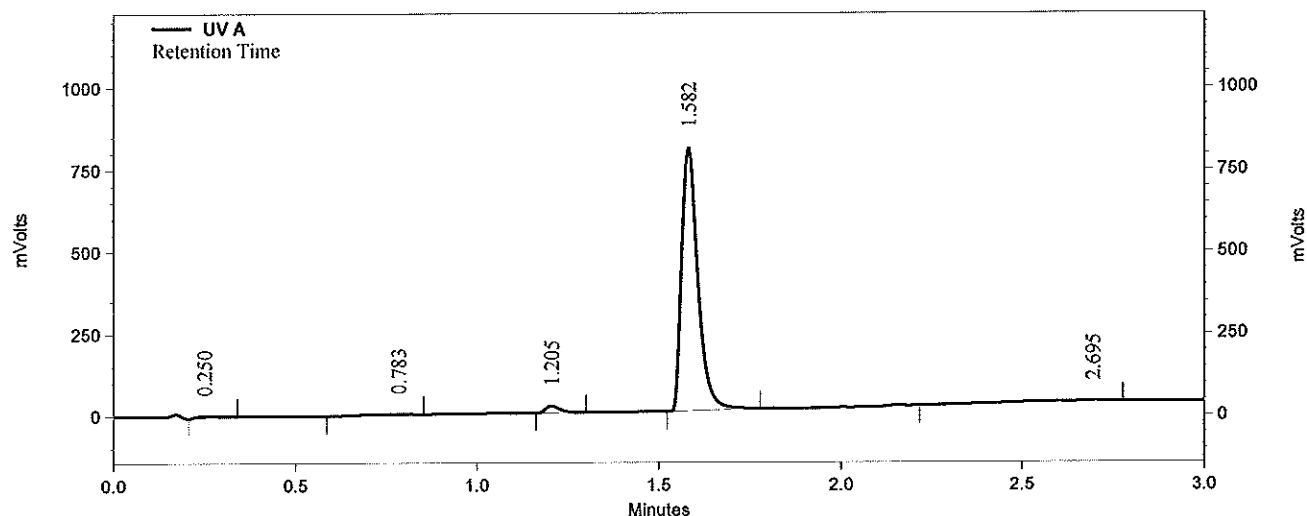

## UV A Results

| PK #   | RT    | Area    | Area %  | Height (uV) | Plates |
|--------|-------|---------|---------|-------------|--------|
| 1      | 0.250 | 22941   | 0.862   | 5516        | 82     |
| 2      | 0.783 | 22672   | 0.852   | 2193        | 164    |
| 3      | 1.205 | 57716   | 2.169   | 20589       | 4292   |
| 4      | 1.582 | 2489563 | 93.570  | 800701      | 6227   |
| 5      | 2.695 | 67750   | 2.546   | 3754        | 0      |
| Totals |       | 2660642 | 100.000 | 832753      |        |

Sample: 1  
File:2011\_0713\_1619-049  
Description:

Vial:1:A,1  
Date:13-Jul-2011

ID:61838-143-08  
Time:16:19:41

Printed: Wed Jul 13 16:26:41 2011

### Sample Report:

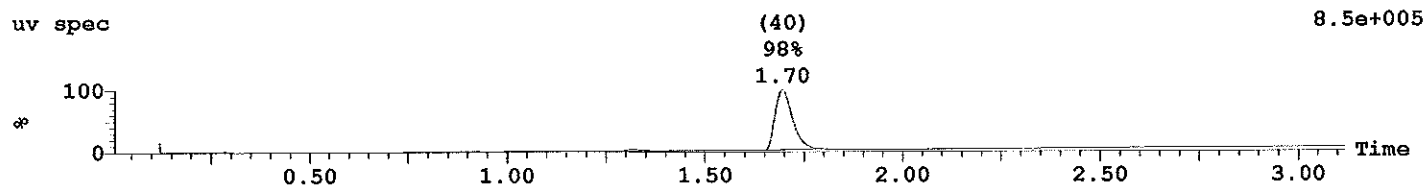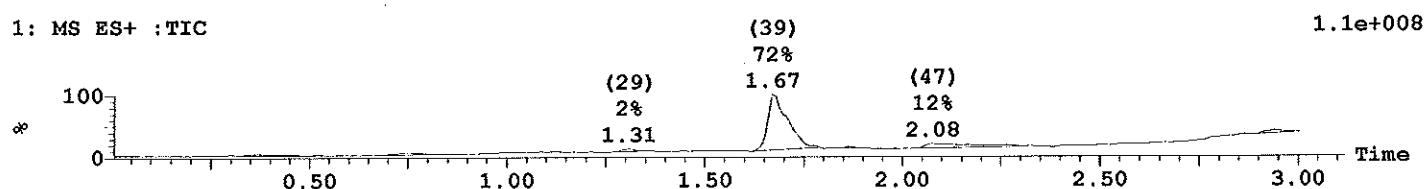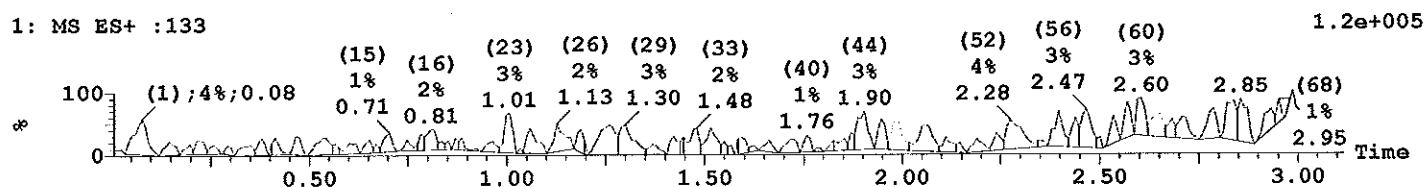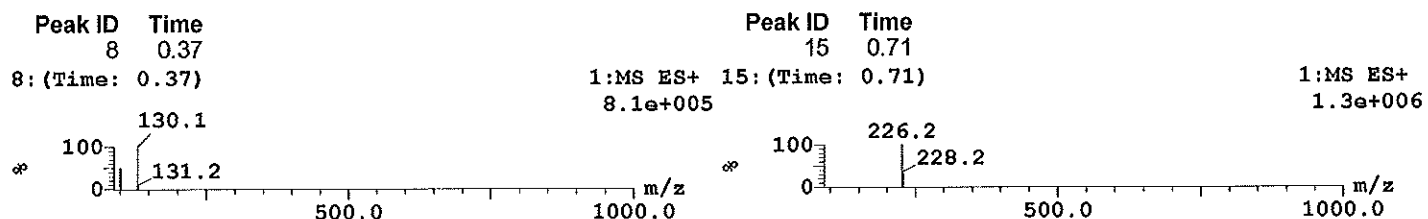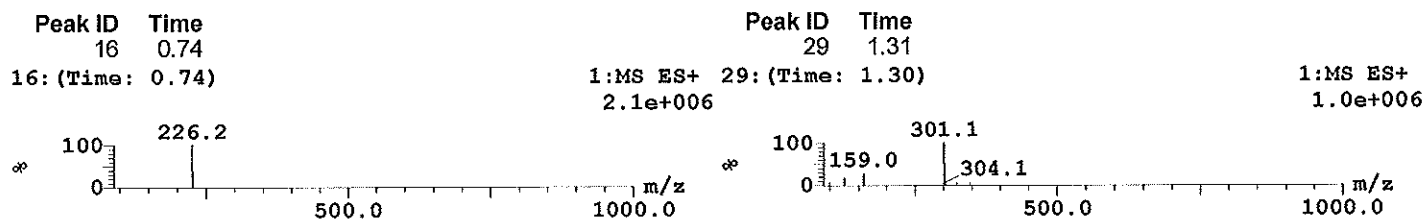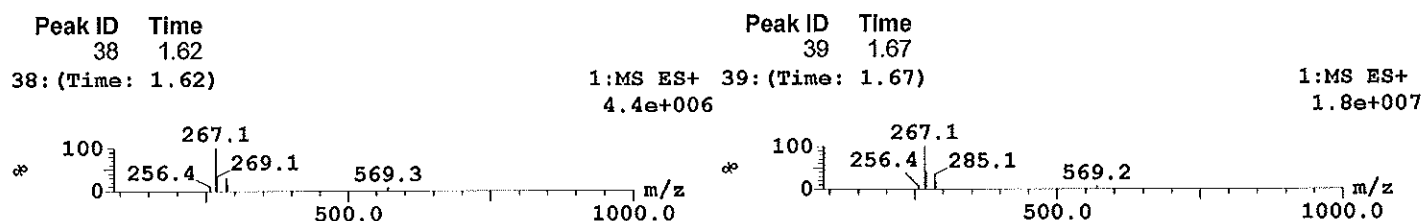

Sample: 1  
File:2011\_0713\_1619-049  
Description:

Vial:1:A,1  
Date:13-Jul-2011

ID:61838-143-08  
Time:16:19:41

Printed: Wed Jul 13 16:26:41 2011

Sample Report (continued):

Peak ID Time  
40 1.72  
40: (Time: 1.70)

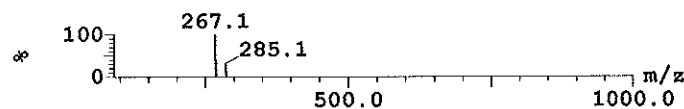

Peak ID Time  
42 1.86  
1:MS ES+ 42: (Time: 1.86)  
2.0e+007

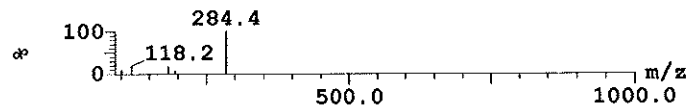

1:MS ES+  
1.1e+006

Peak ID Time  
43 1.87  
43: (Time: 1.87)

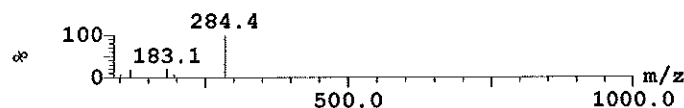

Peak ID Time  
44 1.90  
1:MS ES+ 44: (Time: 1.90)  
1.1e+006

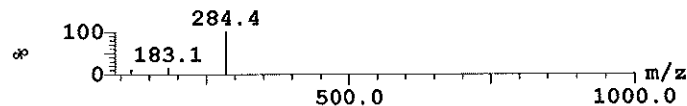

1:MS ES+  
1.1e+006

Peak ID Time  
47 2.08  
47: (Time: 2.08)

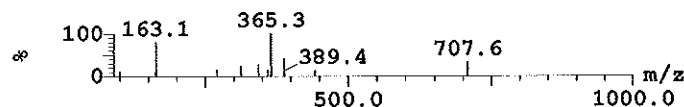

Peak ID Time  
48 2.11  
1:MS ES+ 48: (Time: 2.11)  
1.1e+006

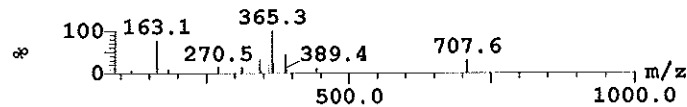

1:MS ES+  
1.3e+006

Peak ID Time  
49 2.15  
49: (Time: 2.15)

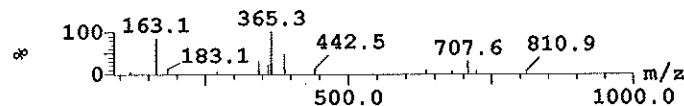

Peak ID Time  
67 2.94  
1:MS ES+ 67: (Time: 2.94)  
9.0e+005

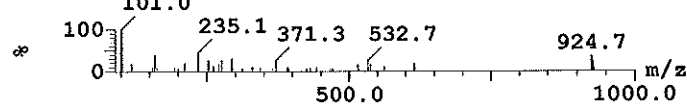

1:MS ES+  
1.0e+006

Peak ID Time  
68 2.95  
68: (Time: 2.95)

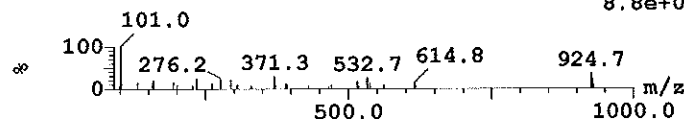

1:MS ES+  
8.8e+005

# Analytical HPLC Report

File: =  
 c:\shimadzu\data\public\weixu.zhai\20110713\2011\_0713\_1627-050.dat  
 Sample ID: = 61838-144-25  
 Acquired: = 7/13/2011 4:30:32 PM  
 File = 2011\_0713\_1627.050  
 User = weixu.zhai  
 Instrument = WFD-409D-LCMS3  
 Well = 191 Inj. Vol. = 3 uL  
 Start % B = 0  
 Final % B = 100  
 Gradient Time = 2 min  
 Flow Rate = 1 ml/min  
 Wavelength = 220  
 Solvent Pair = Water/ Acetonitrile/ 0.1%TFA  
 Solvent A = 90% Water/ 10% Acetonitrile/ 0.1%TFA  
 Solvent B = 10% Water/ 90% Acetonitrile/ 0.1%TFA  
 Column 1 = 1.) Phenomenex LUNA C18, 30x2, 3u  
 MW1 = 132+  
 Oven Temp. = 40

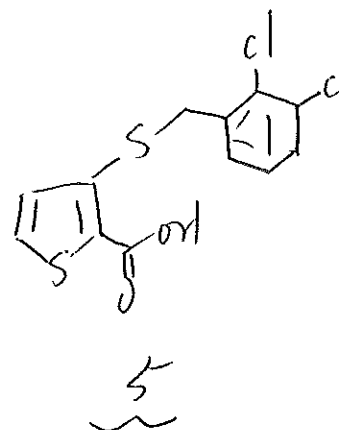

61838-144-25

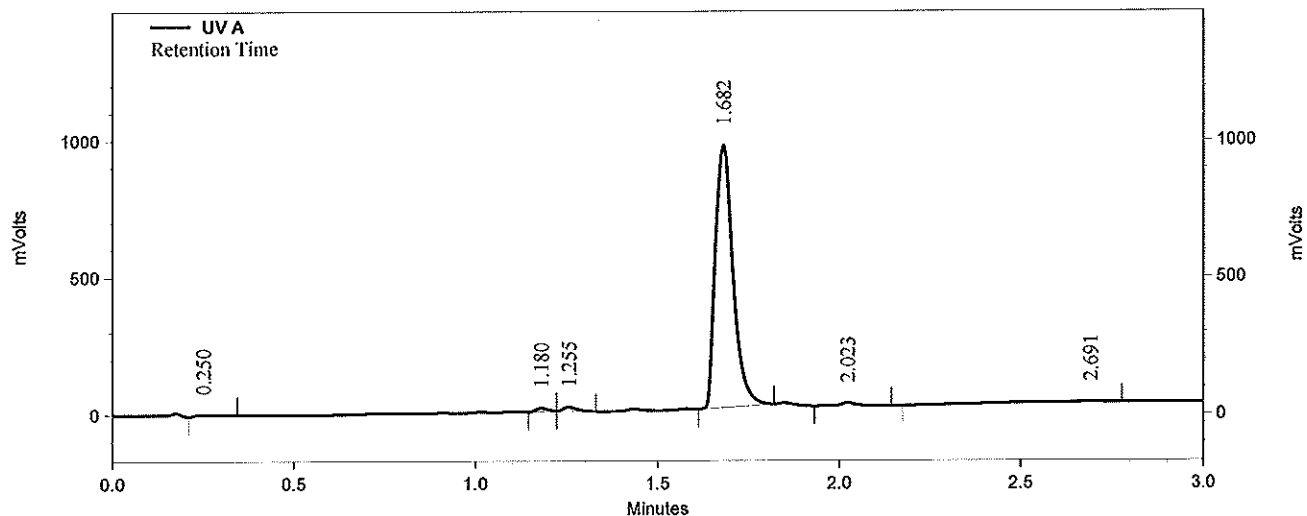

## UV A Results

| Pk # | RT    | Area    | Area % | Height (uV) | Plates |
|------|-------|---------|--------|-------------|--------|
| 1    | 0.250 | 21720   | 0.630  | 5352        | 85     |
| 2    | 1.180 | 26752   | 0.775  | 11947       | 5848   |
| 3    | 1.255 | 36299   | 1.052  | 14190       | 5310   |
| 4    | 1.682 | 3260108 | 94.489 | 956042      | 5863   |
| 5    | 2.023 | 29600   | 0.858  | 10673       | 14205  |
| 6    | 2.691 | 75787   | 2.197  | 3555        | 366    |

|        |  |         |         |         |  |
|--------|--|---------|---------|---------|--|
| Totals |  | 3450266 | 100.000 | 1001759 |  |
|--------|--|---------|---------|---------|--|

Sample: 1

Vial: 1:A, 1

ID: 61838-144-25

File: 2011\_0713\_1627-050

Date: 13-Jul-2011

Time: 16:27:27

Description:

Printed: Wed Jul 13 16:34:24 2011

## Sample Report:

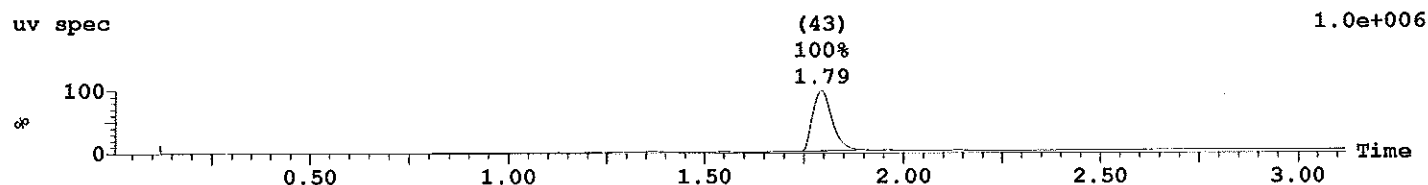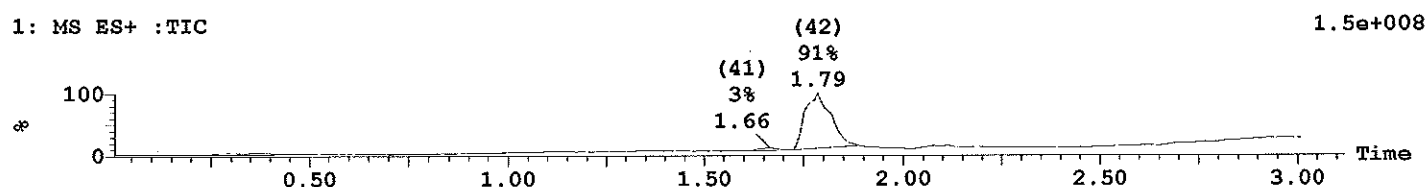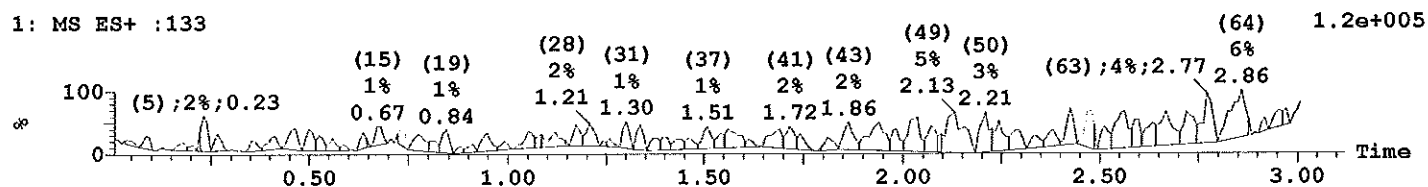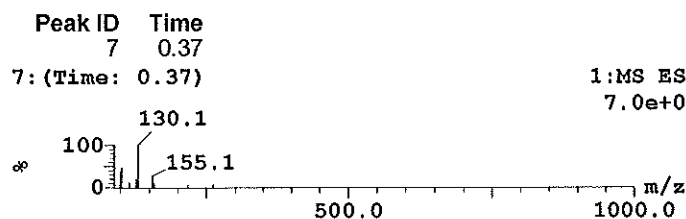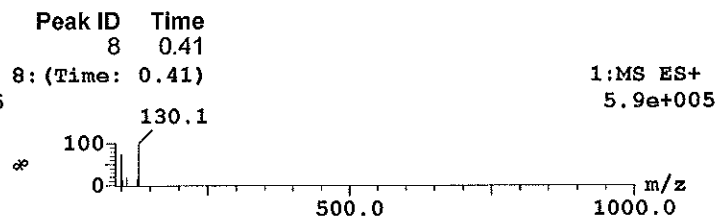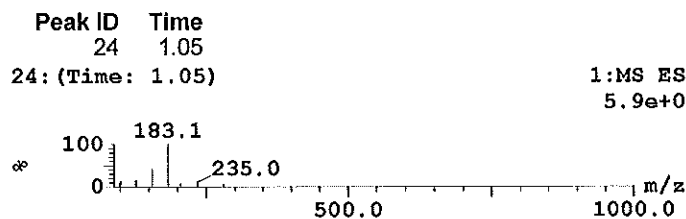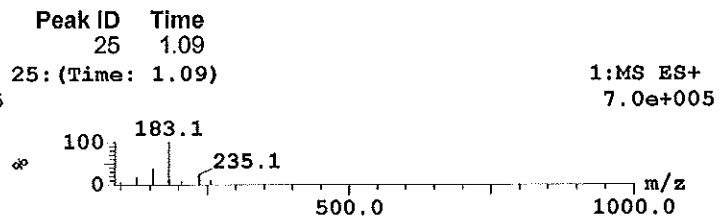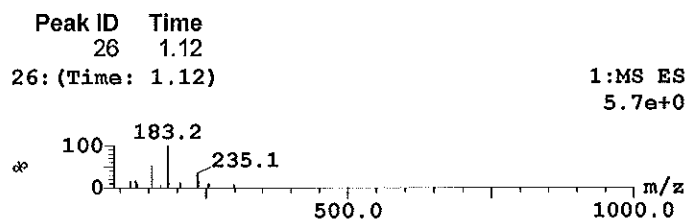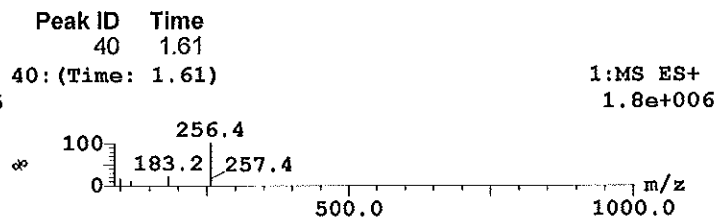

Sample: 1  
File:2011\_0713\_1627-050  
Description:

Vial:1:A,1  
Date:13-Jul-2011

ID:61838-144-25  
Time:16:27:27

Printed: Wed Jul 13 16:34:24 2011

Sample Report (continued):

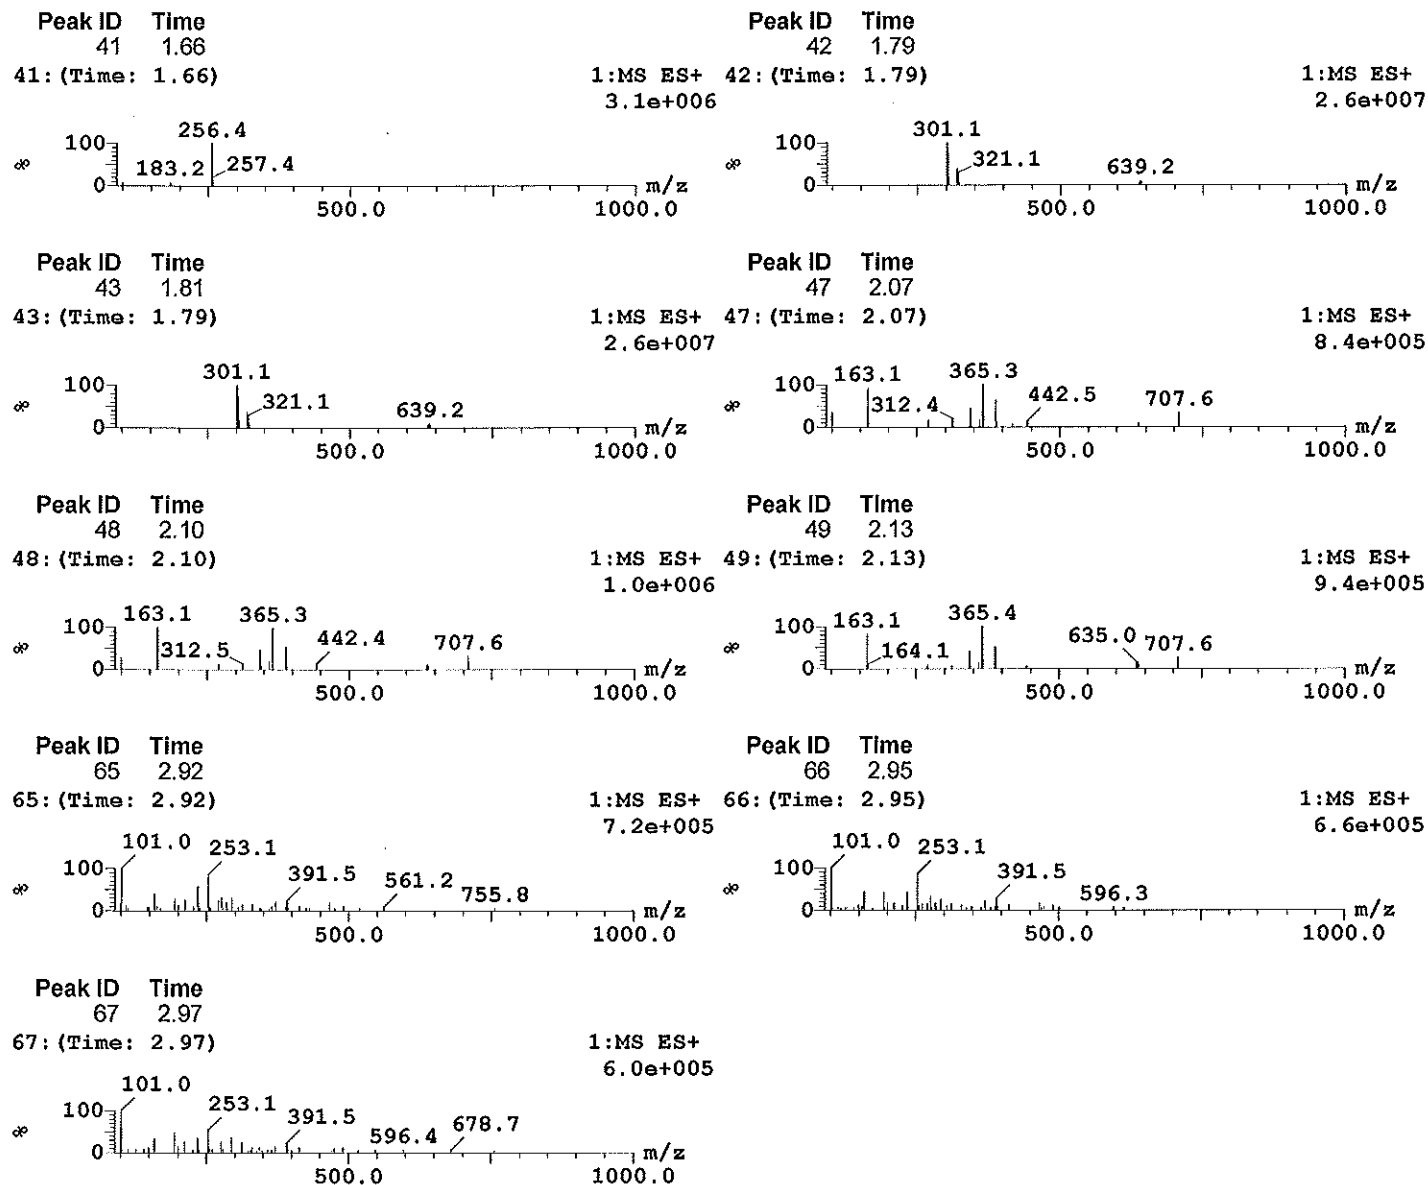

# Analytical HPLC Report

File: = C:\CLASS-VP\CHROM\0206R.014  
 Sample ID: = 4-24 MW 278  
 Acquired: = 2/7/2006 10:02:36 AM  
 User = weixu.zhai  
 Instrument = WFD-409D-LCMS2  
 Well = 192 Inj. Vol. = 10 uL  
 Start % B = 0  
 Final % B = 100  
 Gradient Time = 2 min  
 Flow Rate = 5 ml/min  
 Wavelength = 220  
 Solvent A = H2O : ACN 95% : 5% 10 mm Ammonium Acetate  
 Solvent B = H2O : ACN 5% : 95% 10 mm Ammonium Acetate  
 Column 2 = LUNA 3.0 x 50MM S10

61838-172-4

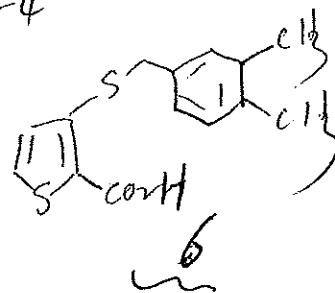

4-24

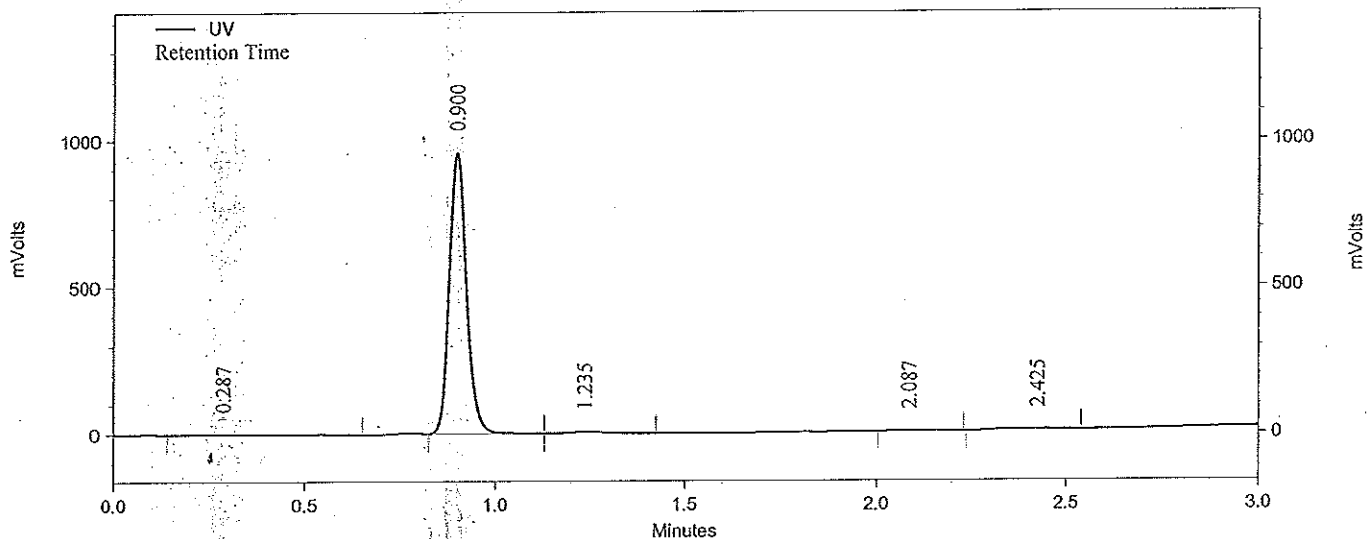

## UV Results

| Pk # | RT    | Area    | Area % | Height (uV) | Plates |
|------|-------|---------|--------|-------------|--------|
| 1    | 0.287 | 29125   | 0.933  | 1744        | 6      |
| 2    | 0.900 | 3002558 | 96.218 | 955525      | 1920   |
| 3    | 1.235 | 26825   | 0.860  | 5018        | 1505   |
| 4    | 2.087 | 20501   | 0.657  | 2461        | 1609   |
| 5    | 2.425 | 41571   | 1.332  | 3512        | 1210   |

|        |  |         |         |        |  |
|--------|--|---------|---------|--------|--|
| Totals |  | 3120580 | 100.000 | 968260 |  |
|--------|--|---------|---------|--------|--|

Sample: 1  
File:0206R014  
Description:

Vial:1:A,1  
Date:07-Feb-2006

ID:4-24  
Time:09:56:27

Printed: Tue Feb 07 10:02:20 2006

### Sample Report:

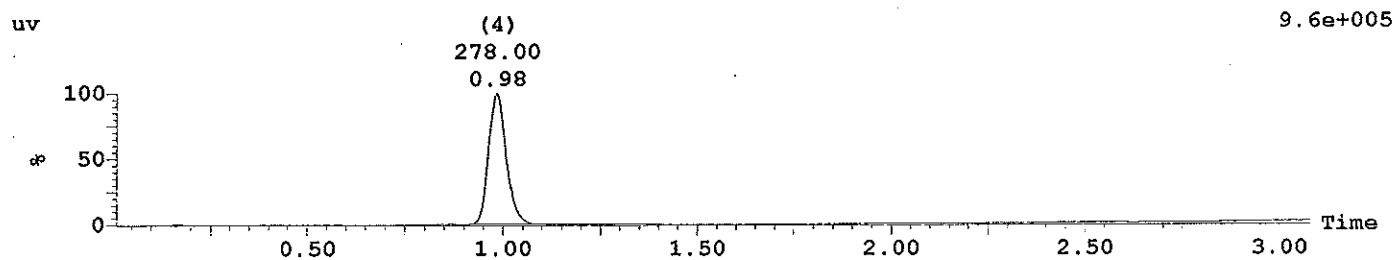

1: MS ES- :TIC Smooth (SG, 1x2) 4.8e+007

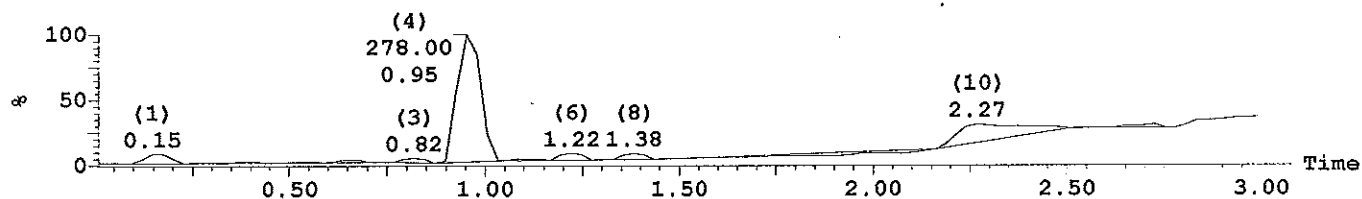

1: MS ES- :277 Smooth (SG, 1x2) 5.5e+006

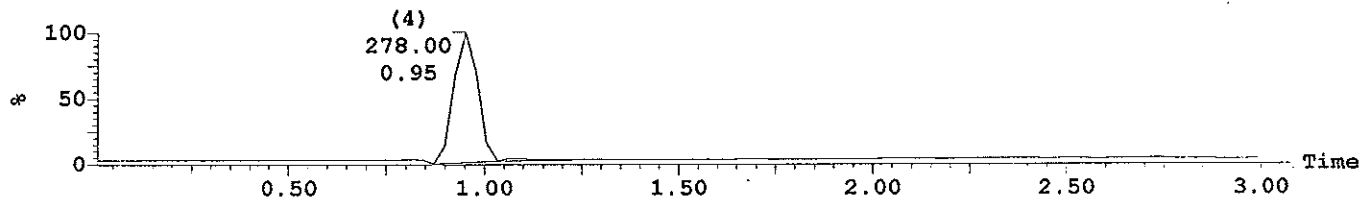

2: MS ES+ :TIC Smooth (SG, 1x2) 1.8e+008

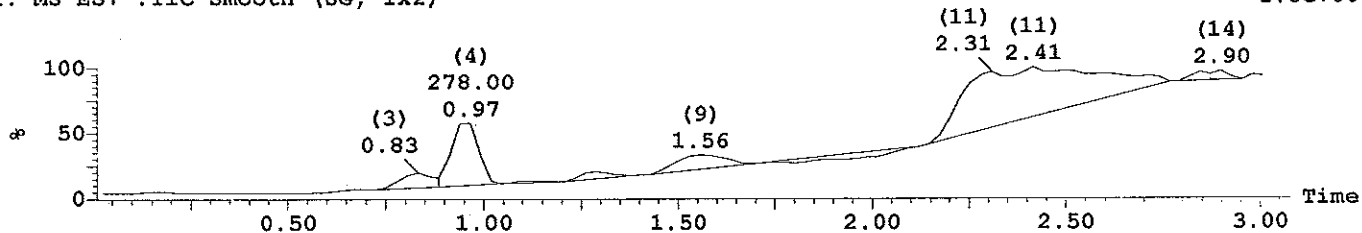

2: MS ES+ :279 Smooth (SG, 1x2) 1.5e+007

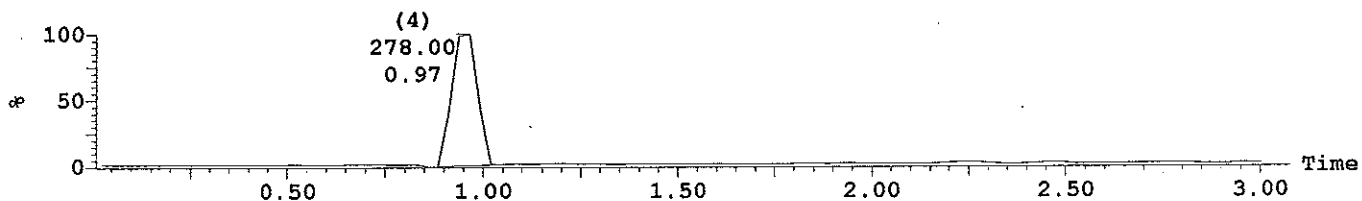



Sample: 1  
File:0206R014  
Description:

Vial:1:A,1  
Date:07-Feb-2006

ID:4-24  
Time:09:56:27

Printed: Tue Feb 07 10:02:20 2006

Sample Report (continued):

Peak ID Time  
1 0.15  
Combine (4:8-15:16)

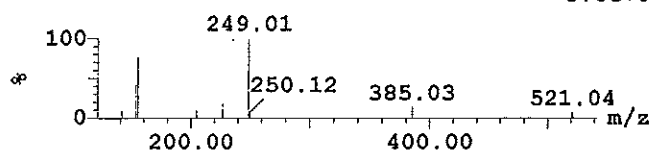

Peak ID Time  
3 0.82  
Combine (29:33-(22:23+39:40))

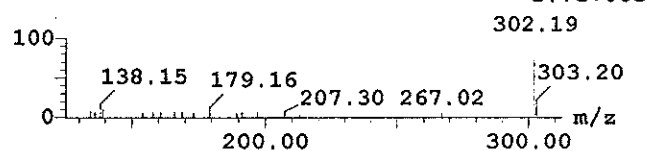

Peak ID Time  
3 0.82  
Combine (29:33-(20:21+39:40))

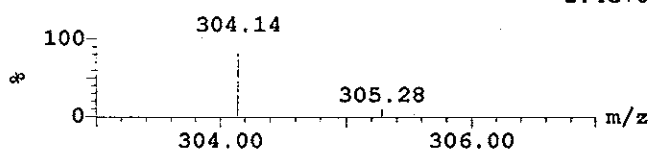

Peak ID Time  
4 0.95  
Combine (35:39-(27:29+46:48))

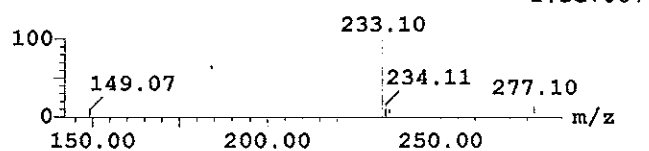

Peak ID Time  
4 0.95  
Combine (34:38-(26:27+45:46))

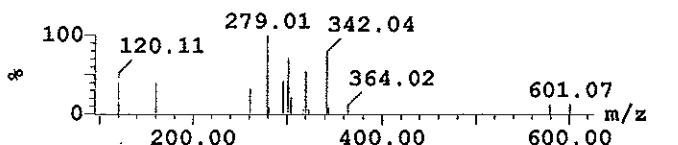

Peak ID Time  
5 1.06  
Combine (38:42-(32:33+57:58))

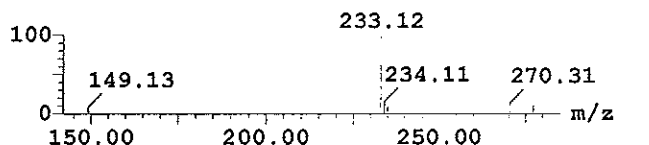

Peak ID Time  
7 1.29  
Combine (46:50-(38:39+58:59))

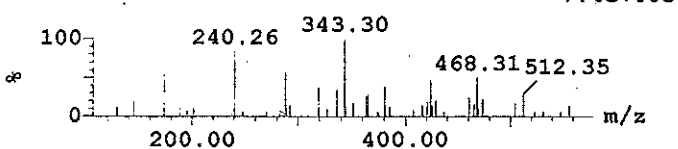

Peak ID Time  
9 1.56  
Combine (56:60-(46:47+69:70))

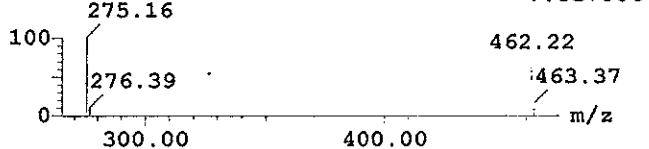

Peak ID Time  
10 2.27  
Combine (83:87-(74:75+100:101))

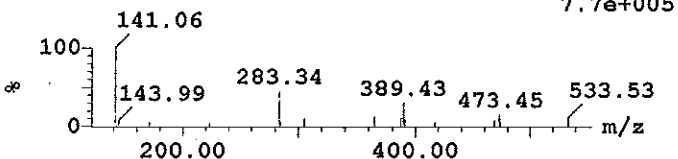

# Analytical HPLC Report

File: =  
 C:\shimadzu\data\public\weixu.zhai\20110714\2011\_0714\_1030-007.dat  
 Sample ID: = 61838-143-10  
 Acquired: = 7/14/2011 10:32:49 AM  
 File = 2011\_0714\_1030.007  
 User = weixu.zhai  
 Instrument = WFD-409D-LCMS  
 Well = 192 Inj. Vol. = 3 uL  
 Start % B = 0  
 Final % B = 100  
 Gradient Time = 2 min  
 Flow Rate = 1 ml/min  
 Wavelength = 220  
 Solvent Pair = Water :Methanol: 0.1% TFA  
 Solvent A = 90% Water :10% Methanol: 0.1% TFA  
 Solvent B = 10% Water :90% Methanol: 0.1% TFA  
 Column 1 = (1)PHENOMENEX-LUNA 2.0 x 30mm 3um  
 MWl = 132+  
 Oven Temp. = 40

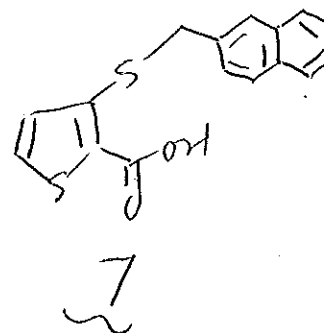

61838-143-10

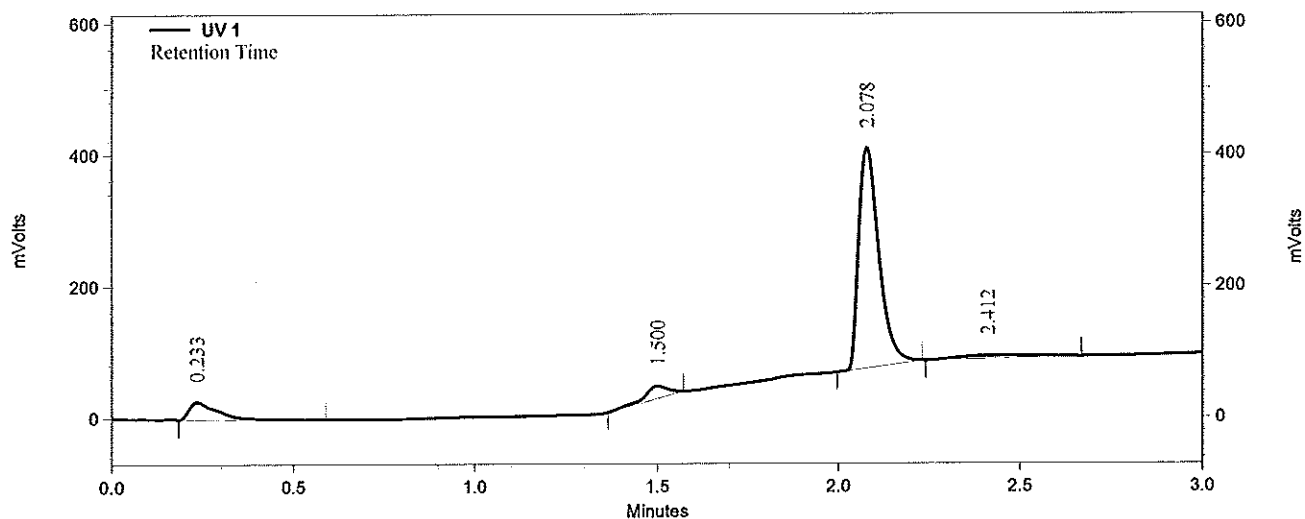

## UV 1 Results

| Pk # | RT    | Area    | Area % | Height (uV) | Plates |
|------|-------|---------|--------|-------------|--------|
| 1    | 0.233 | 144462  | 9.092  | 26695       | 47     |
| 2    | 1.500 | 85528   | 5.383  | 18485       | 2756   |
| 3    | 2.078 | 1295833 | 81.556 | 333595      | 6769   |
| 4    | 2.412 | 63062   | 3.969  | 4524        | 568    |

|        |  |         |         |        |  |
|--------|--|---------|---------|--------|--|
| Totals |  | 1588885 | 100.000 | 383299 |  |
|--------|--|---------|---------|--------|--|

Sample: 1

Vial: 1:A, 1

ID: 61838-143-10

File: 2011\_0714\_1030-007

Date: 14-Jul-2011

Time: 10:30:58

Description:

Printed: Thu Jul 14 10:35:55 2011

## Sample Report:

uv spec

4.1e+005

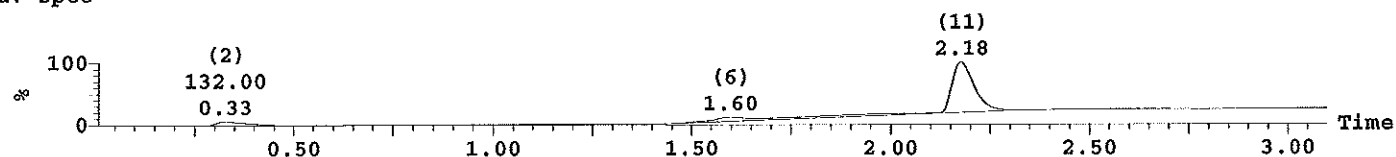

1: MS ES+ :TIC Smooth (SG, 1x2)

4.1e+006

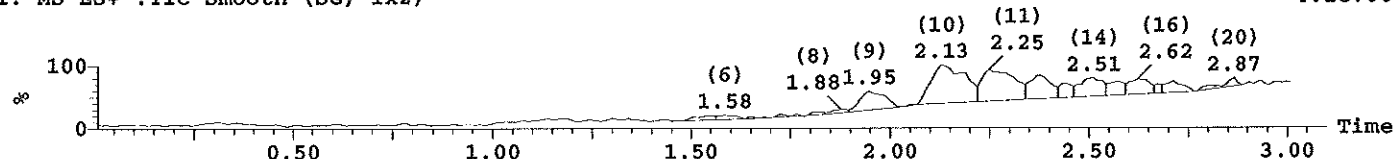

1: MS ES+ :133 Smooth (SG, 1x2)

1.4e+004

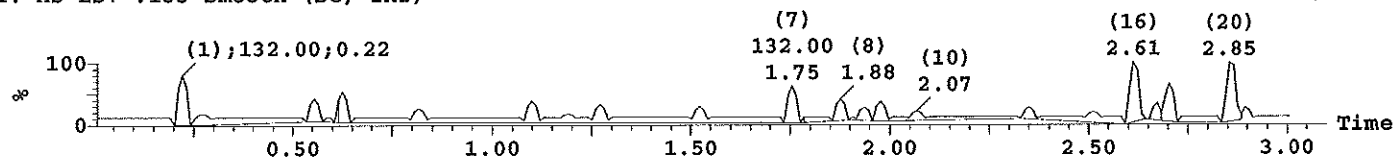

Peak ID Time  
5 1.54

Combine (148:158-(126:131+170:175))

1:MS ES+  
7.3e+004

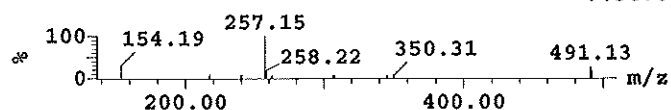

Peak ID Time  
6 1.58

Combine (154:163-(124:129+180:185))

1:MS ES+  
7.4e+004

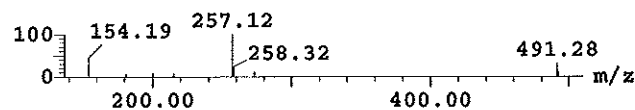

Peak ID Time  
8 1.88

Combine (181:191-(164:169+203:208))

1:MS ES+  
7.1e+004

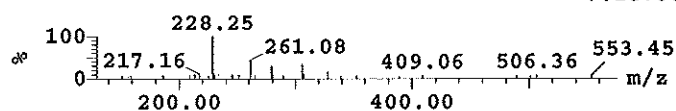

Peak ID Time  
9 1.95

Combine (188:198-(168:173+217:222))

1:MS ES+  
2.7e+005

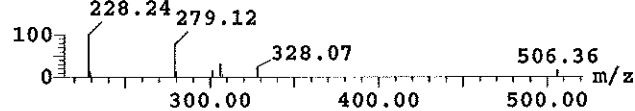

Peak ID Time  
10 2.13

Combine (206:216-(185:190+235:240))

1:MS ES+  
8.4e+005

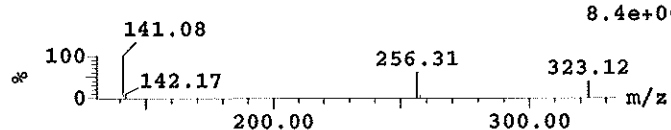

Peak ID Time  
11 2.25

Combine (211:221-(145:150+245:250))

1:MS ES+  
7.2e+005

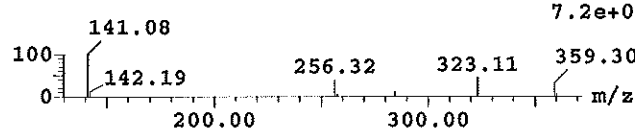

# Analytical HPLC Report

File: = C:\CLASS-VP\CHROM\0206R.001  
 Sample ID: = 172-01-20 MW 408  
 Acquired: = 2/6/2006 4:37:10 PM  
 User = weixu.zhai  
 Instrument = WFD-409D-LCMS2  
 Well = 192 Inj. Vol. = 10 uL  
 Start % B = 0  
 Final % B = 100  
 Gradient Time = 2 min  
 Flow Rate = 5 ml/min  
 Wavelength = 220  
 Solvent A = H2O : ACN 95% : 5% 10 mM Ammonium Acetate  
 Solvent B = H2O : ACN 5% : 95% 10 mM Ammonium Acetate  
 Column 2 = LUNA 3.0 x 50MM S10

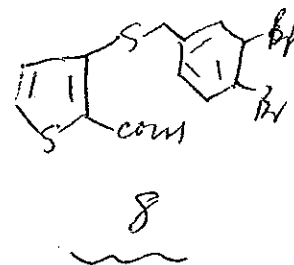

172-01-20

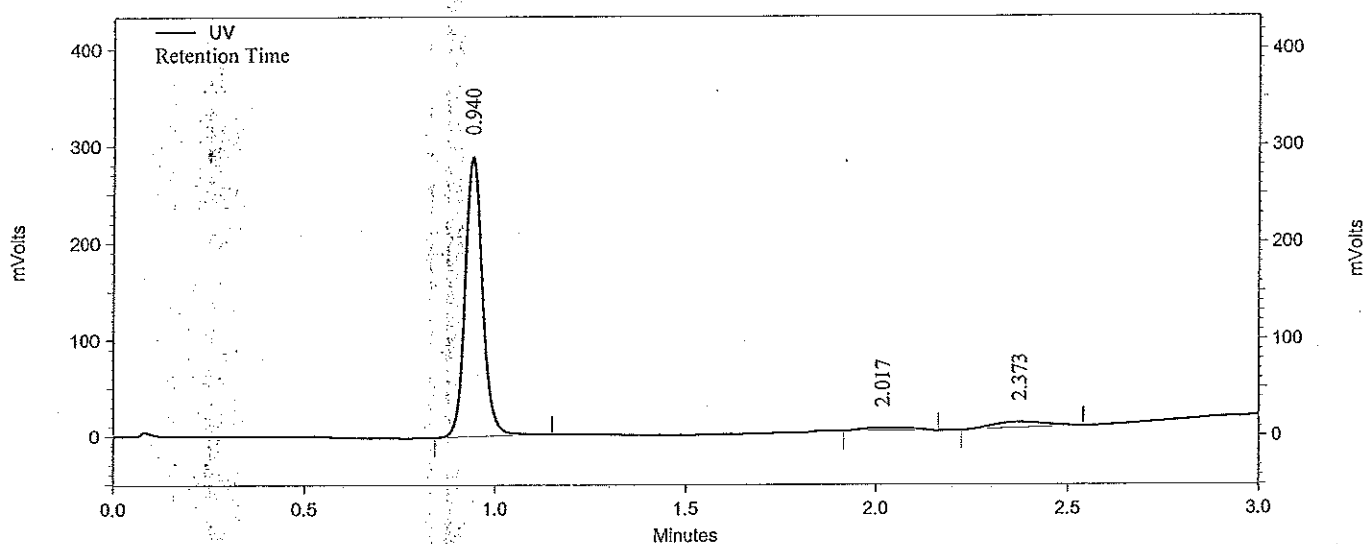

| UV Results |       |         |         |             |        |  |
|------------|-------|---------|---------|-------------|--------|--|
| Pk #       | RT    | Area    | Area %  | Height (uV) | Plates |  |
| 1          | 0.940 | 918306  | 91.496  | 288930      | 2158   |  |
| 2          | 2.017 | 27541   | 2.744   | 2768        | 1234   |  |
| 3          | 2.373 | 57813   | 5.760   | 5964        | 1235   |  |
| Totals     |       | 1003660 | 100.000 | 297662      |        |  |

Sample: 1  
File:0206R001  
Description:

Vial:1:A,1  
Date:06-Feb-2006

ID:172-01-20  
Time:16:30:24

Printed: Mon Feb 06 16:36:57 2006

# Sample Report:

uv

2.9e+005

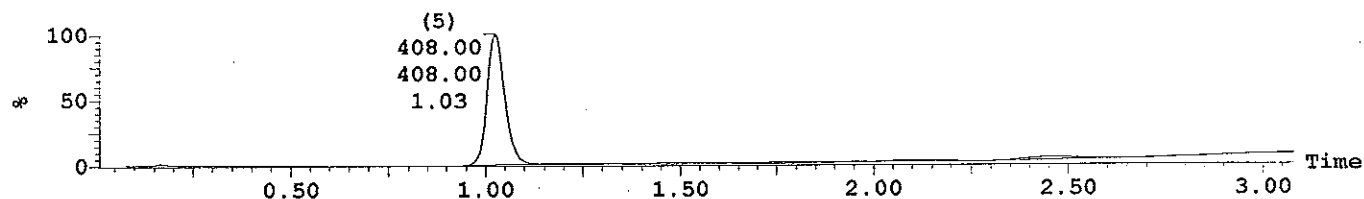

1: MS ES- :TIC Smooth (SG, 1x2) (5) 2.8e+007

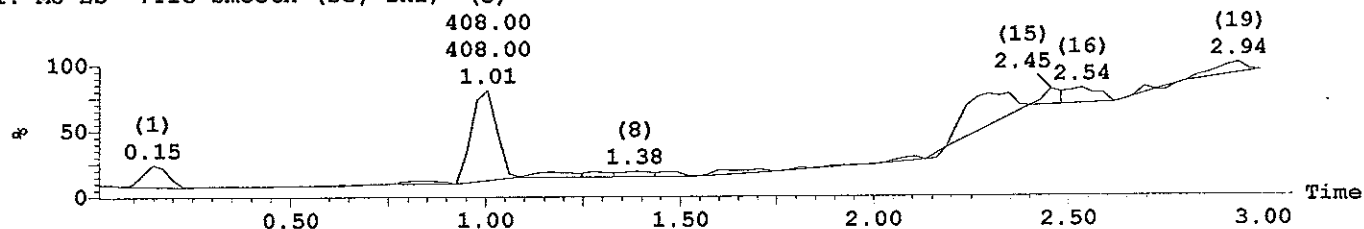

1: MS ES- :407 Smooth (SG, 1x2) 2.6e+006

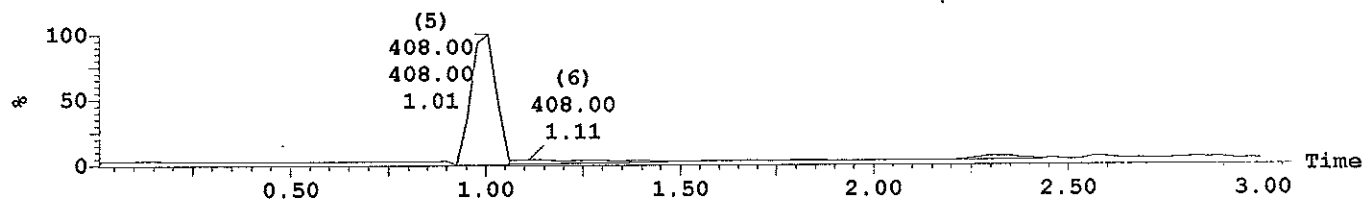

2: MS ES+ :TIC Smooth (SG, 1x2) 2.1e+008

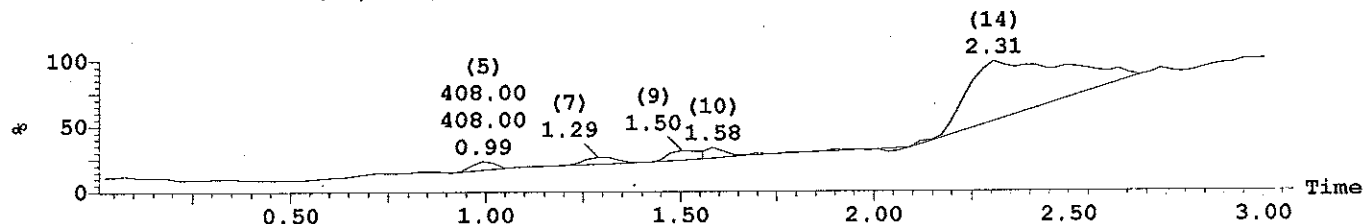

2: MS ES+ :409 Smooth (SG, 1x2) 1.1e+006

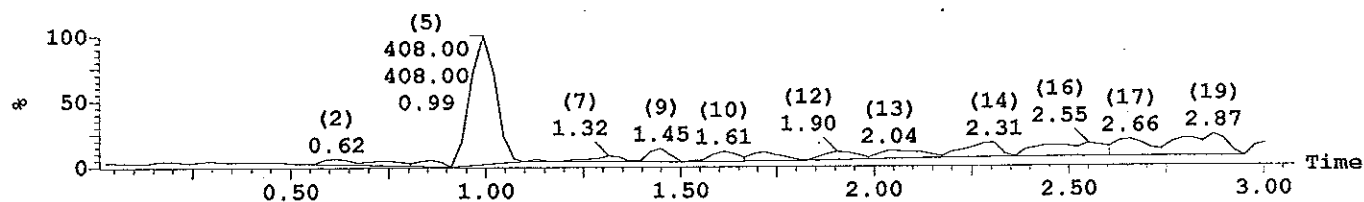

Sample: 1  
File: 0206R001  
Description:

Vial: 1:A,1  
Date: 06-Feb-2006

ID: 172-01-20  
Time: 16:30:24

Printed: Mon Feb 06 16:36:57 2006

Sample Report (continued):

Peak ID Time  
3 0.75  
Combine (26:30-(18:19+36:37)) 2:MS ES+  
2.2e+006

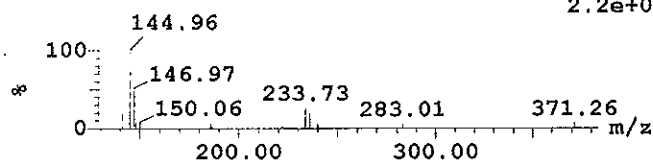

Peak ID Time  
5 1.01  
Combine (37:41-(28:30+49:51)) 1:MS ES-  
3.3e+006

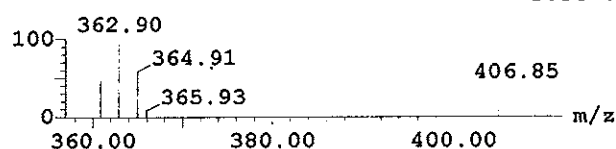

Peak ID Time  
5 1.01  
Combine (36:40-(28:30+48:50)) 2:MS ES+  
2.4e+006

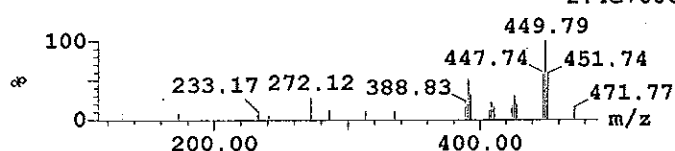

Peak ID Time  
9 1.49  
Combine (54:58-(46:47+64:65)) 2:MS ES+  
1.3e+007

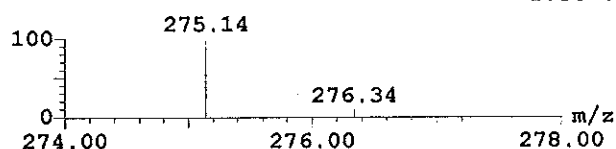

Peak ID Time  
10 1.60  
Combine (58:62-(49:50+68:69)) 2:MS ES+  
8.6e+006

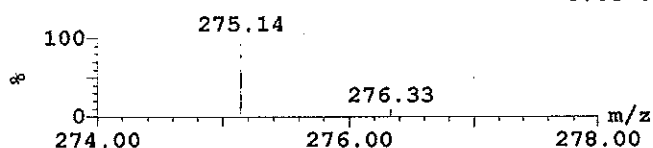

Peak ID Time  
14 2.35  
Combine (84:88-(71:72+106:107)) 2:MS ES+  
1.3e+007

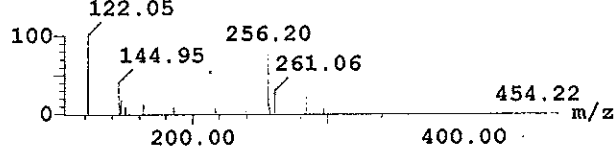

Peak ID Time  
15 2.45  
Combine (90:93-(78:80+103:105)) 2:MS ES+  
1.3e+007

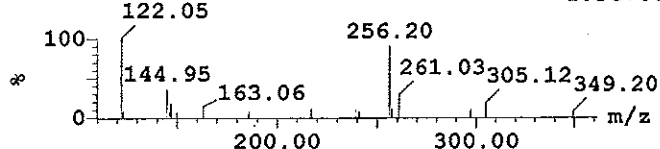

Peak ID Time  
16 2.54  
Combine (93:97-(87:88+103:104)) 2:MS ES+  
3.6e+006

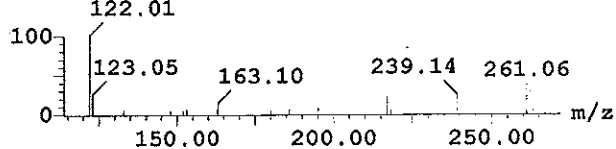

Peak ID Time  
17 2.70  
Combine (97:101-(90:91+108:109)) 2:MS ES+  
1.0e+007

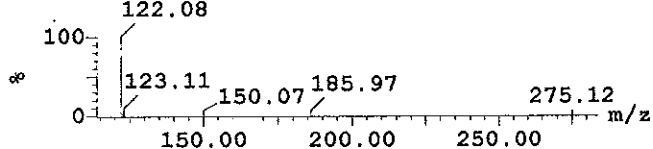

Peak ID Time  
18 2.82  
Combine (103:107-(95:96+112)) 2:MS ES+  
2.5e+006

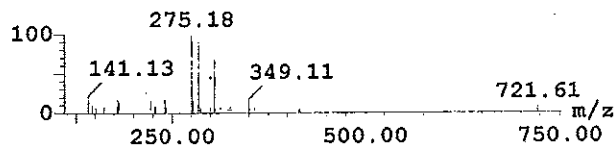

# Analytical HPLC Report

File: =  
 C:\shimadzu\data\public\weixu.zhai\20110713\2011\_0713\_1552-027.dat  
 Sample ID: = 61838-193  
 Acquired: = 7/13/2011 3:54:56 PM  
 File = 2011\_0713\_1552.027  
 User = weixu.zhai  
 Instrument = WFD-409D-LCMS  
 Well = 192 Inj. Vol. = 3 uL  
 Start % B = 0  
 Final % B = 100  
 Gradient Time = 2 min  
 Flow Rate = 1 ml/min  
 Wavelength = 220  
 Solvent Pair = Water :Methanol: 0.1% TFA  
 Solvent A = 90% Water :10% Methanol: 0.1% TFA  
 Solvent B = 10% Water :90% Methanol: 0.1% TFA  
 Column 1 = (1) PHENOMENEX-LUNA 2.0 x 30mm 3um  
 MW1 = 132+  
 Oven Temp. = 40

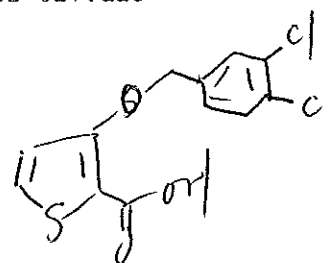

9

61838-193

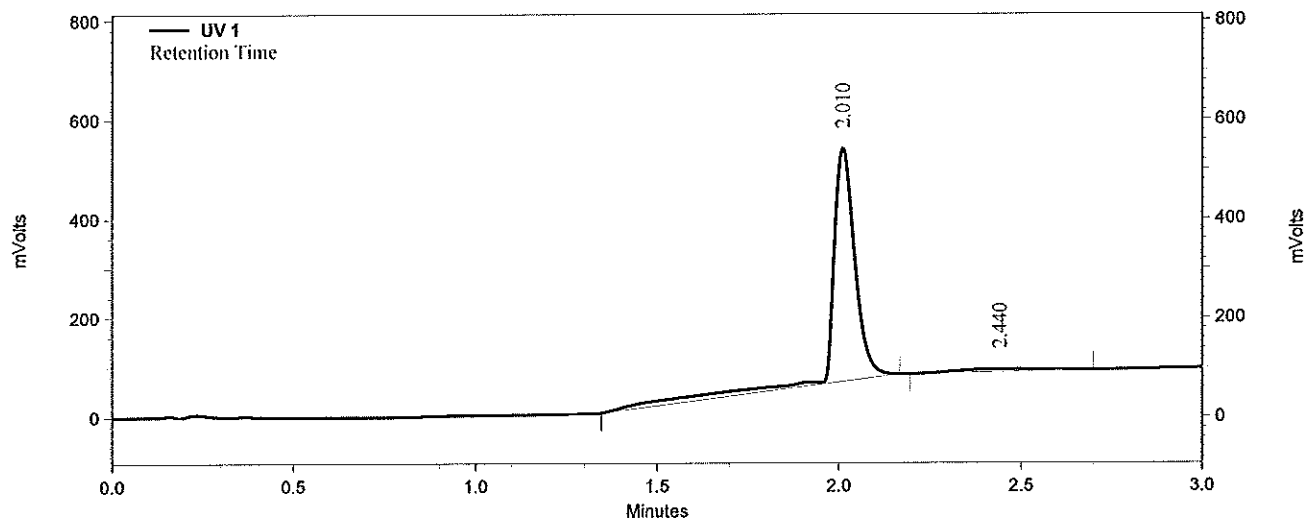

## UV 1 Results

| Pk #   | RT    | Area    | Area %  | Height (uV) | Plates |
|--------|-------|---------|---------|-------------|--------|
| 1      | 2.010 | 2082311 | 95.866  | 469483      | 6475   |
| 2      | 2.440 | 89785   | 4.134   | 5705        | 481    |
| Totals |       | 2172096 | 100.000 | 475188      |        |

Sample: 1  
File:2011\_0713\_1552-027  
Description:

Vial:1:A,1  
Date:13-Jul-2011

ID:61838-193  
Time:15:52:52

Printed: Wed Jul 13 15:58:03 2011

### Sample Report:

uv spec

5.4e+005

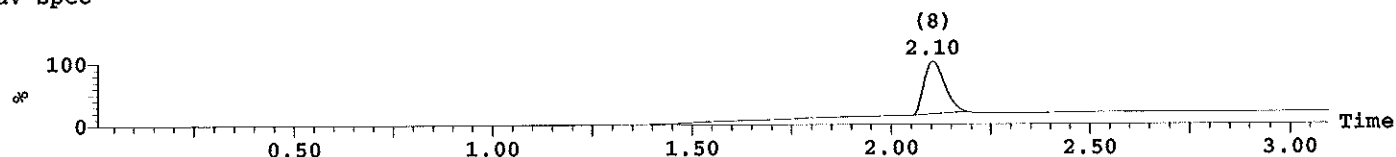

1: MS ES+ :TIC Smooth (SG, 1x2)

1.6e+007

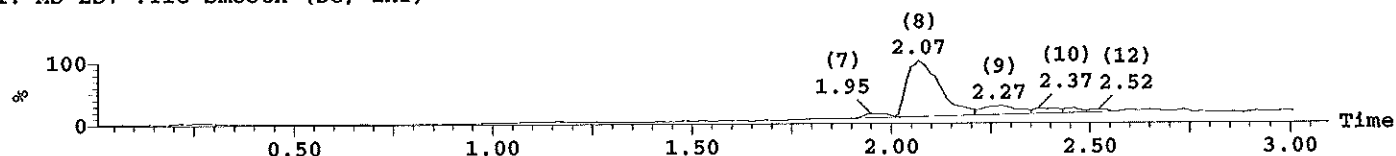

1: MS ES+ :133 Smooth (SG, 1x2)

1.6e+004

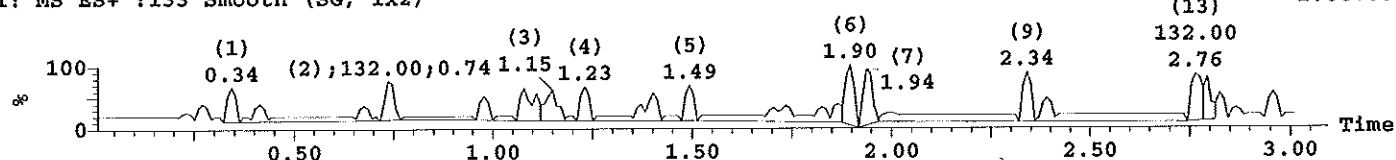

Peak ID Time  
3 1.15

Combine (109:119-(91:96+132:137))

1:MS ES+  
8.4e+004

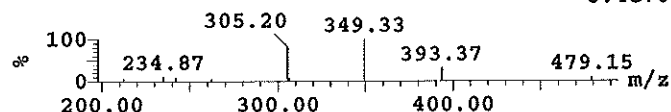

Peak ID Time  
4 1.23

Combine (117:127-(100:105+139:144))

1:MS ES+  
5.1e+004

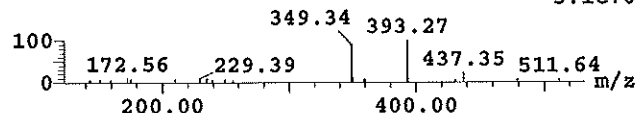

Peak ID Time  
5 1.49

Combine (143:153-(126:131+165:170))

1:MS ES+  
5.5e+004

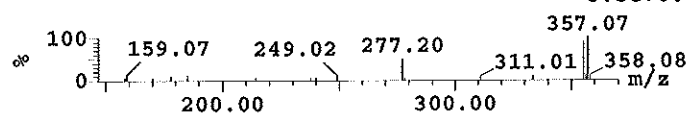

Peak ID Time  
6 1.90

Combine (183:193-(166:171+205:210))

1:MS ES+  
1.4e+005

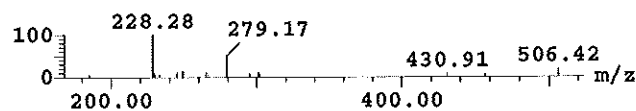

Peak ID Time  
7 1.95

Combine (187:197-(170:175+210:215))

1:MS ES+  
2.5e+005

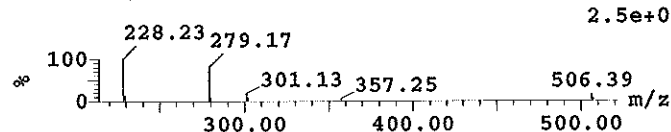

Peak ID Time  
8 2.07

Combine (203:213-(184:189+232:237))

1:MS ES+  
3.8e+006

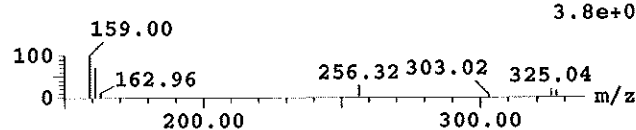



# Analytical HPLC Report

File: = C:\CLASS-VP\CHROM\0320I.015  
 Sample ID: = 65859-015 MW 302  
 Acquired: = 3/20/2006 2:18:31 PM  
 User = weixu.zhai  
 Instrument = WFD-409D-LCMS2  
 Well = 192 Inj. Vol. = 10 uL  
 Start % B = 0  
 Final % B = 100  
 Gradient Time = 2 min  
 Flow Rate = 5 ml/min  
 Wavelength = 220  
 Solvent A = H2O : ACN 95% : 5% 10 mM Ammonium Acetate  
 Solvent B = H2O : ACN 5% : 95% 10 mM Ammonium Acetate  
 Column 2 = LUNA 3.0 x 50MM S10

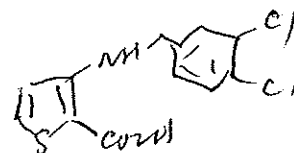

10

65859-015

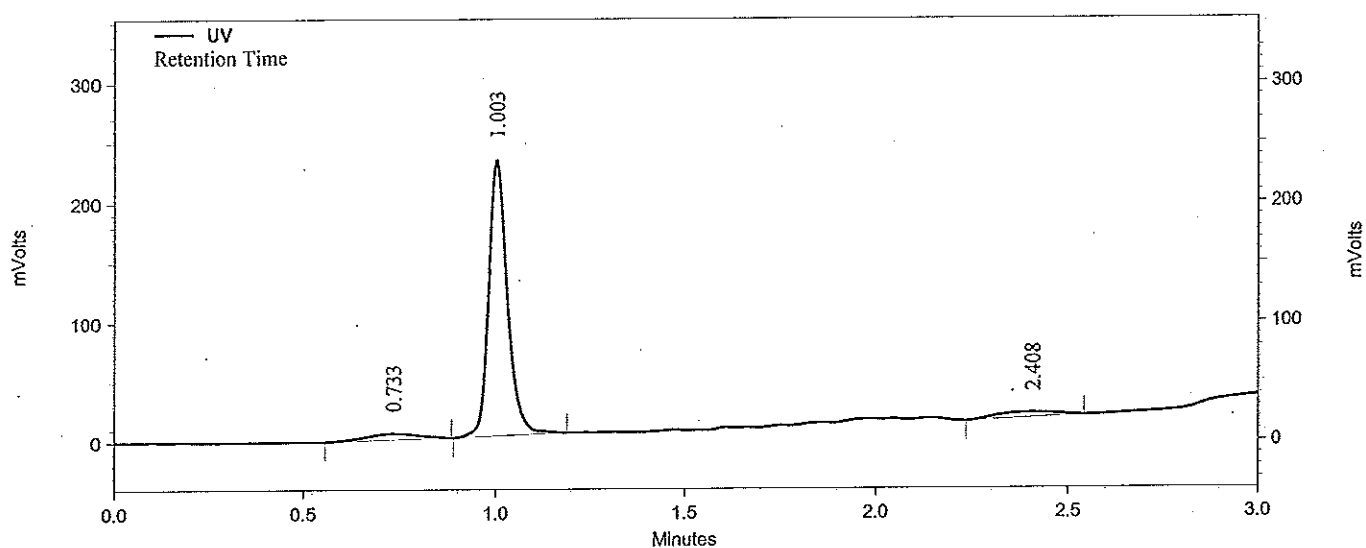

| UV Results |       |        |         |             |        |
|------------|-------|--------|---------|-------------|--------|
| Pk #       | RT    | Area   | Area %  | Height (uV) | Plates |
| 1          | 0.733 | 49824  | 5.595   | 5111        | 127    |
| 2          | 1.003 | 794773 | 89.247  | 230522      | 2083   |
| 3          | 2.408 | 45939  | 5.159   | 4042        | 1177   |
| Totals     |       | 890536 | 100.000 | 239675      |        |

Sample: 1  
File:03201015  
Description:

Vial:1:A,1  
Date:20-Mar-2006

ID:65859-015  
Time:14:11:38

Printed: Mon Mar 20 14:17:36 2006

### Sample Report:

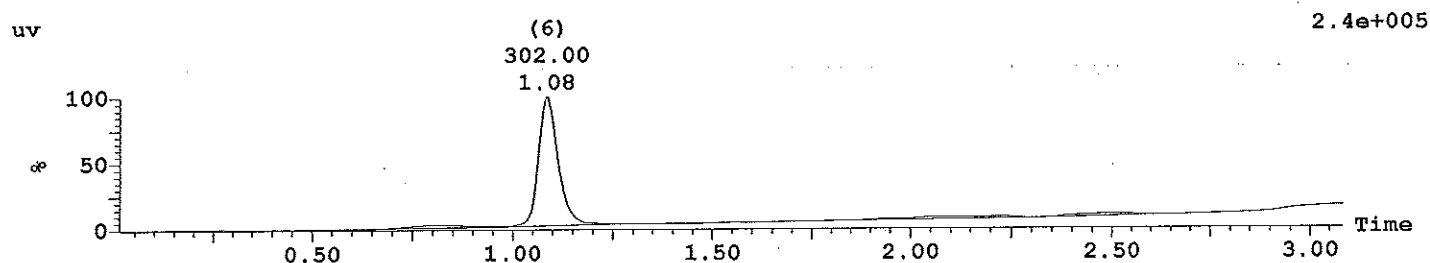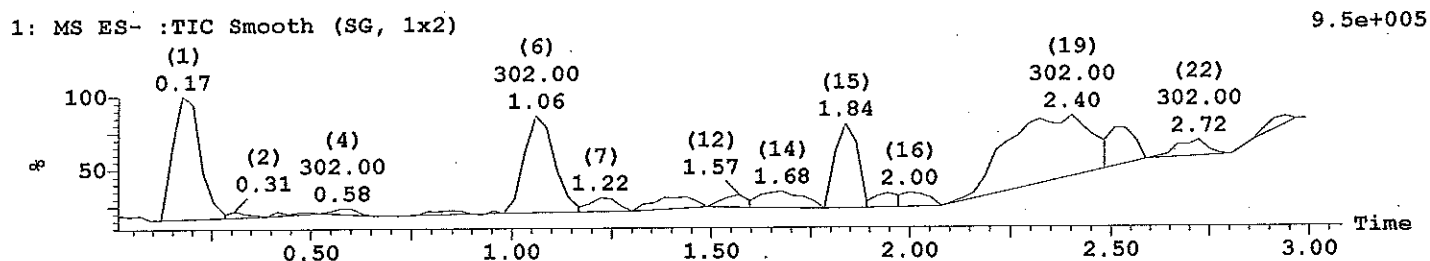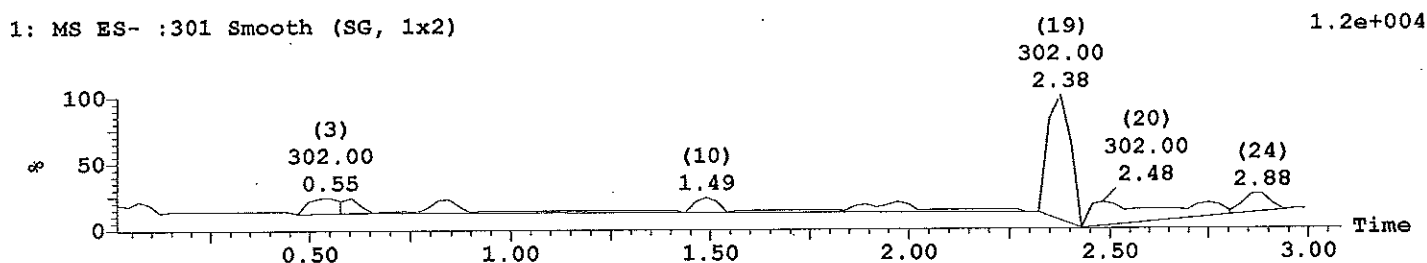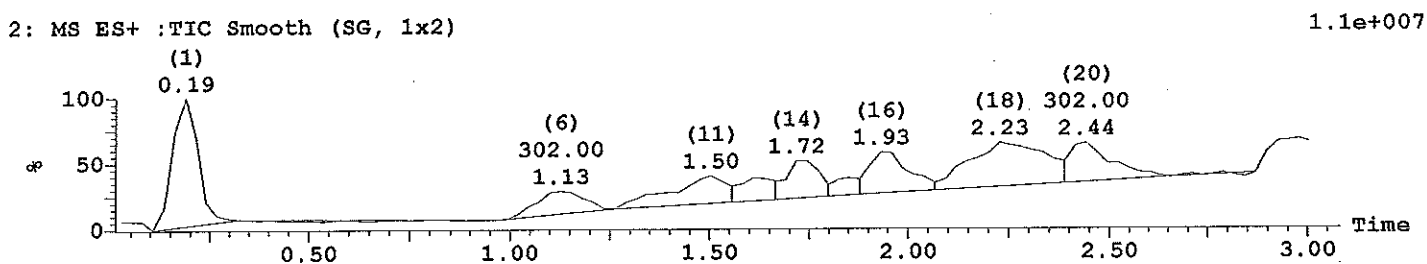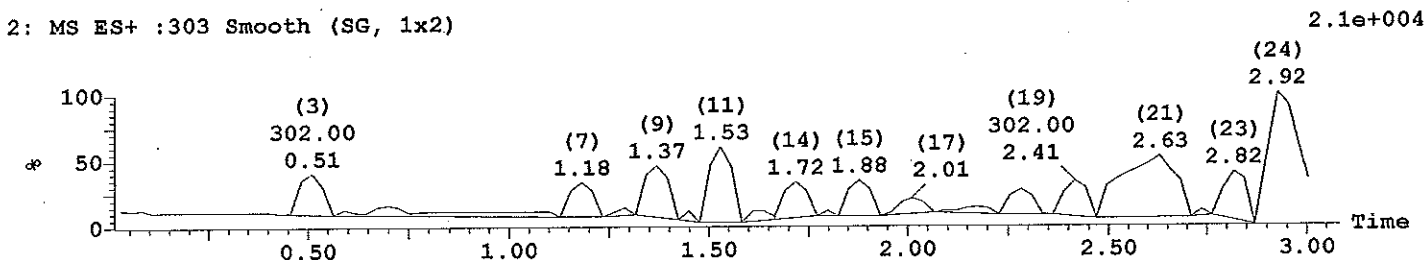

Sample: 1  
File:03201015  
Description:

Vial:1:A,1  
Date:20-Mar-2006

ID:65859-015  
Time:14:11:38

Printed: Mon Mar 20 14:17:36 2006

Sample Report (continued):

Peak ID Time  
1 0.17  
Combine (5:9-18:19)

2:MS ES+  
1.0e+006

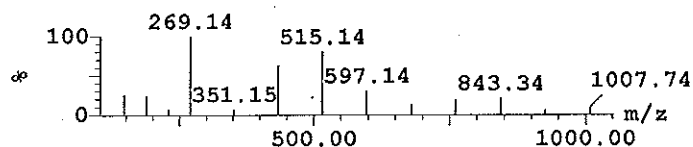

Peak ID Time  
6 1.06  
Combine (39:42-(29:31+52:54))

2:MS ES+  
5.8e+005

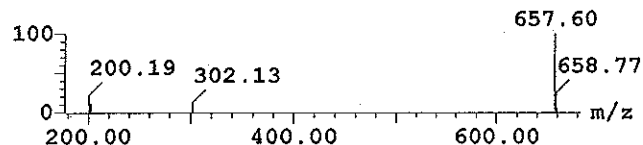

Peak ID Time  
7 1.22  
Combine (42:46-(35:36+52:53))

2:MS ES+  
5.6e+005

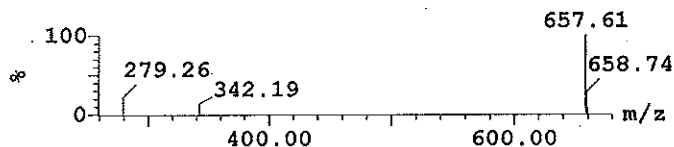

Peak ID Time  
9 1.37  
Combine (49:53-(42:43+59:60))

2:MS ES+  
1.3e+005

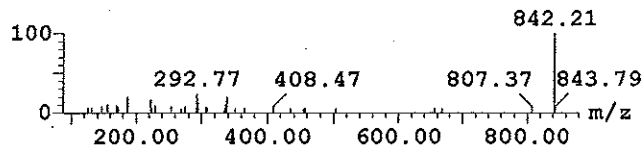

Peak ID Time  
11 1.50  
Combine (55:59-(48:49+65:66))

2:MS ES+  
1.4e+005

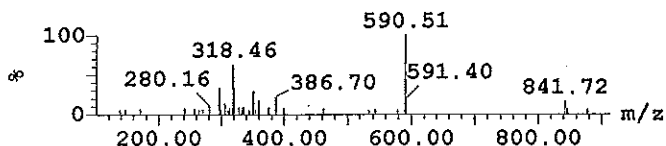

Peak ID Time  
13 1.61  
Combine (58:62-(51:52+68:69))

2:MS ES+  
1.5e+005

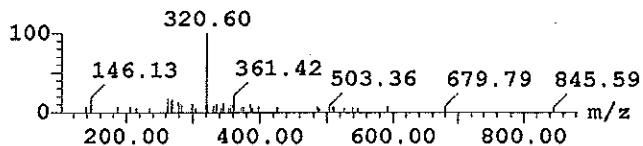

Peak ID Time  
15 1.84  
Combine (68:72-(61:62+78:79))

2:MS ES+  
1.8e+005

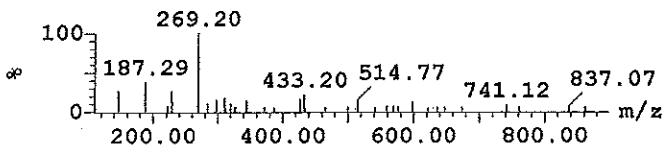

Peak ID Time  
16 1.95  
Combine (70:74-(63:64+83:84))

2:MS ES+  
1.7e+005

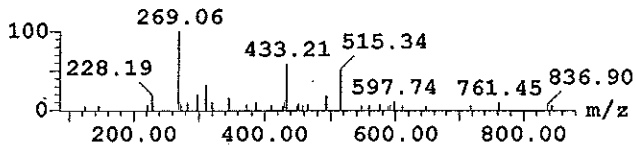

Peak ID Time  
18 2.23  
Combine (81:85-(70:71+95:96))

2:MS ES+  
3.2e+005

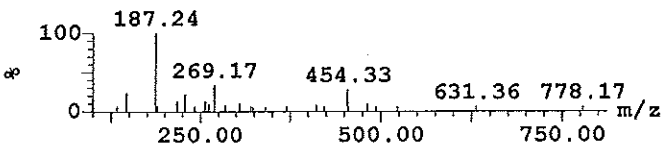

Peak ID Time  
20 2.51  
Combine (89:93-(82:83+105:106))

2:MS ES+  
3.1e+005

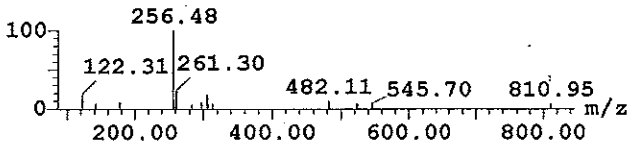

# Analytical HPLC Report

File: = C:\CLASS-VP\CHROM\0307U.008  
 Sample ID: = 196-7 MW 351  
 Acquired: = 3/7/2006 9:40:19 AM  
 User = weixu.zhai  
 Instrument = WFD-409D-LCMS2  
 Well = 192 Inj. Vol. = 10 uL  
 Start % B = 0  
 Final % B = 100  
 Gradient Time = 2 min  
 Flow Rate = 5 ml/min  
 Wavelength = 220  
 Solvent A = H2O : ACN 95% : 5% 10 mM Ammonium Acetate  
 Solvent B = H2O : ACN 5% : 95% 10 mM Ammonium Acetate  
 Column 2 = LUNA 3.0 x 50MM S10

61838-196

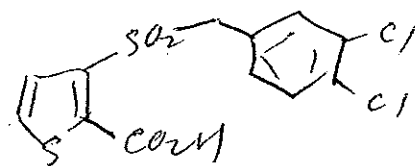

11

196-7

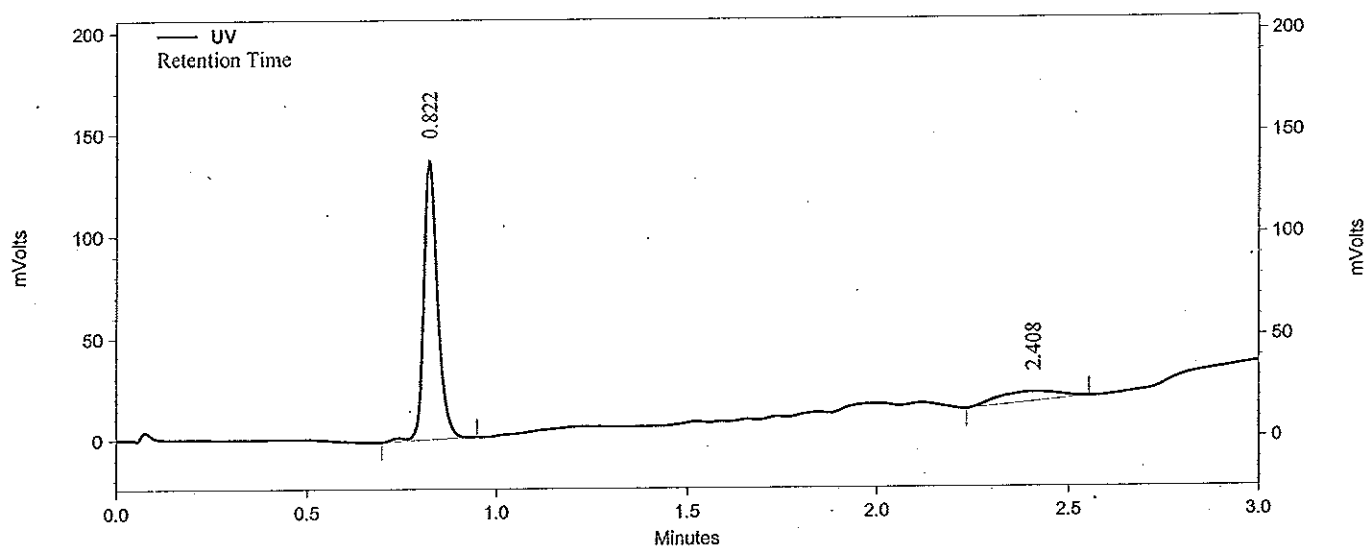

## UV Results

| Pk #   | RT    | Area   | Area %  | Height (uV) | Plates |
|--------|-------|--------|---------|-------------|--------|
| 1      | 0.822 | 351201 | 86.734  | 136965      | 2546   |
| 2      | 2.408 | 53715  | 13.266  | 4706        | 1149   |
| Totals |       | 404916 | 100.000 | 141671      |        |

Sample: 1  
File:0307U008  
Description:

Vial:1:A,1  
Date:07-Mar-2006

ID:196-7  
Time:09:35:30

Printed: Tue Mar 07 09:39:38 2006

### Sample Report:

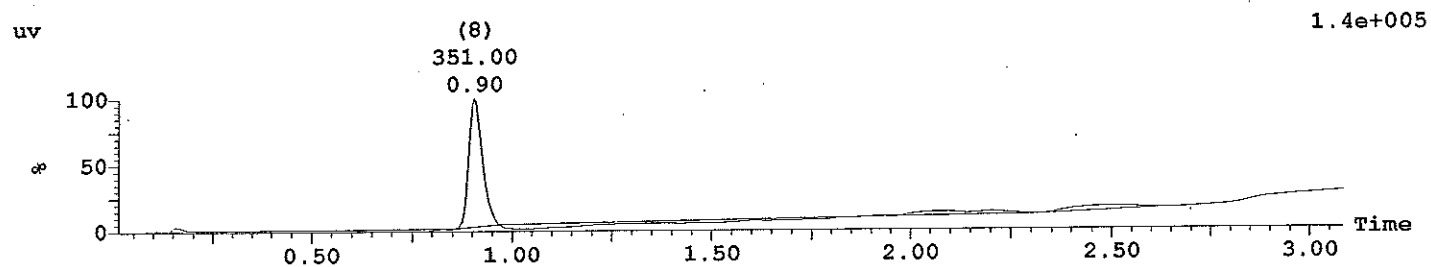

1: MS ES- :TIC Smooth (SG, 1x2)

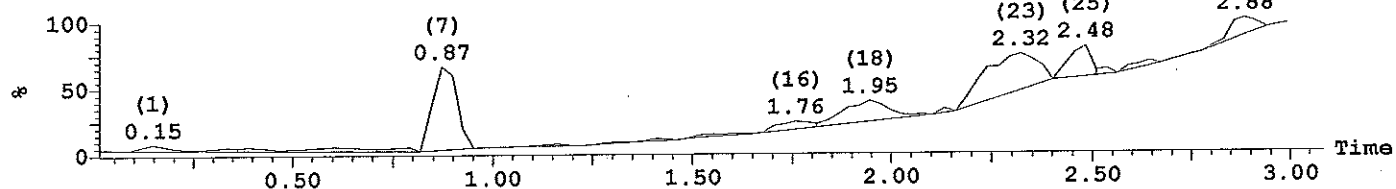

1: MS ES- :350 Smooth (SG, 1x2)

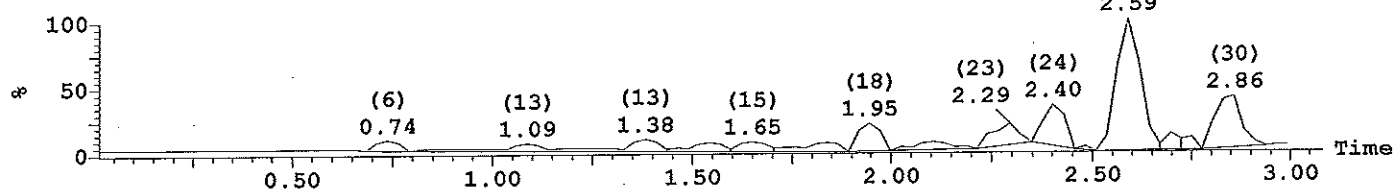

2: MS ES+ :TIC Smooth (SG, 1x2)

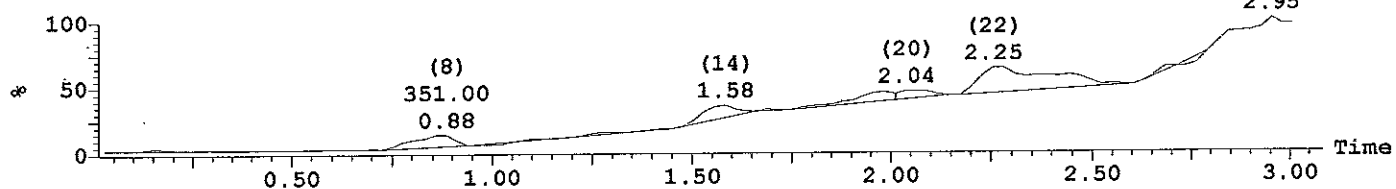

2: MS ES+ :352 Smooth (SG, 1x2)

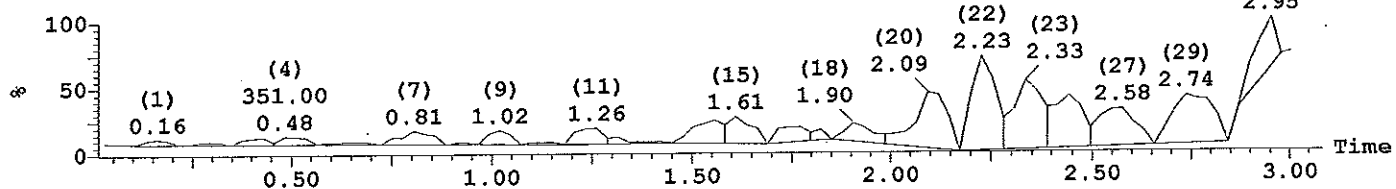

Sample: 1  
File:0307U008  
Description:

Vial:1:A,1  
Date:07-Mar-2006

ID:196-7  
Time:09:35:30

Printed: Tue Mar 07 09:39:38 2006

Sample Report (continued):

Peak ID Time  
7 0.87  
Combine (28:32-(20:21+39:40))

2:MS ES+  
1.9e+006

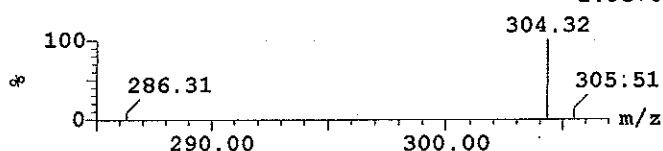

Peak ID Time  
8 0.89  
Combine (32:36-(25:27+42:44))

1:MS ES-  
7.5e+005

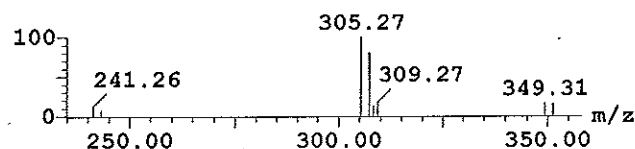

Peak ID Time  
14 1.54  
Combine (57:61-(47:48+68:69))

2:MS ES+  
3.6e+006

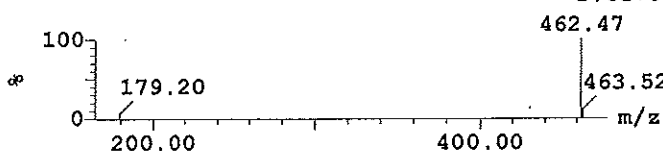

Peak ID Time  
15 1.62  
Combine (58:62-(52:53+69:70))

2:MS ES+  
3.2e+006

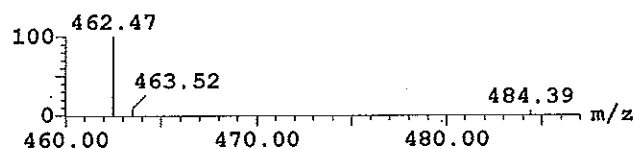

Peak ID Time  
18 1.95  
Combine (69:73-(62:63+80:81))

2:MS ES+  
8.7e+005

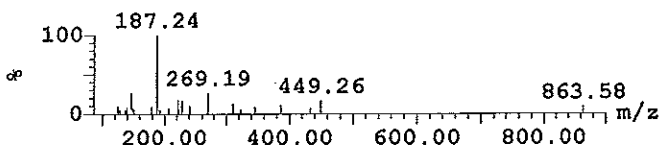

Peak ID Time  
19 1.99  
Combine (72:76-(58:59+81:82))

2:MS ES+  
1.4e+006

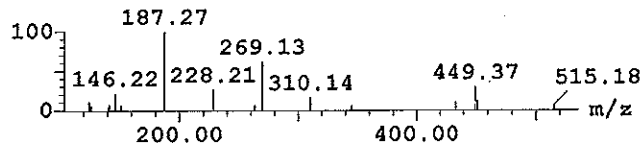

Peak ID Time  
20 2.04  
Combine (76:80-(67:68+87:88))

2:MS ES+  
1.1e+006

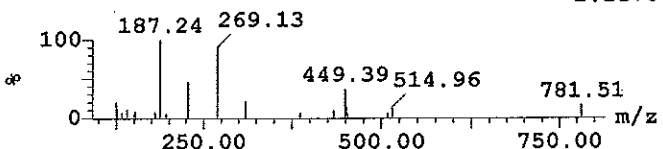

Peak ID Time  
23 2.32  
Combine (85:89-(78:79+95:96))

2:MS ES+  
1.2e+006

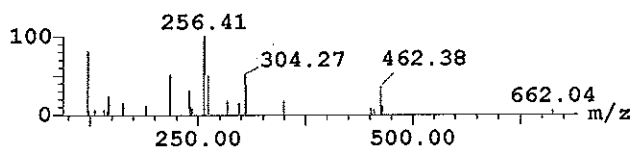

Peak ID Time  
25 2.48  
Combine (91:94-(79:81+104:106))

2:MS ES+  
1.5e+006

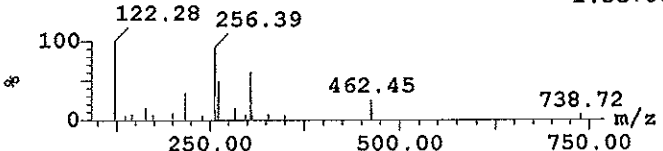

Peak ID Time  
29 2.75  
Combine (100:104-(92:93+112))

2:MS ES+  
6.7e+005

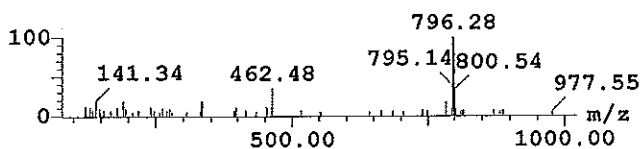

# Analytical HPLC Report

File: = C:\CLASS-VP\CHROM\0224I.016  
 Sample ID: = 184-12 MW 396  
 Acquired: = 2/24/2006 9:50:11 AM  
 User = weixu.zhai  
 Instrument = WFD-409D-LCMS2  
 Well = 191 Inj. Vol. = 10 uL  
 Start % B = 0  
 Final % B = 100  
 Gradient Time = 2 min  
 Flow Rate = 5 ml/min  
 Wavelength = 220  
 Solvent A = H2O : ACN 95% : 5% 10 mm Ammonium Acetate  
 Solvent B = H2O : ACN 5% : 95% 10 mm Ammonium Acetate  
 Column 2 = LUNA 3.0 x 50MM S10

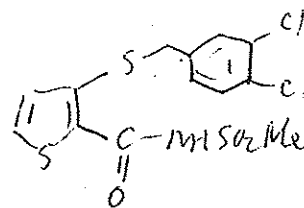

12

184-12

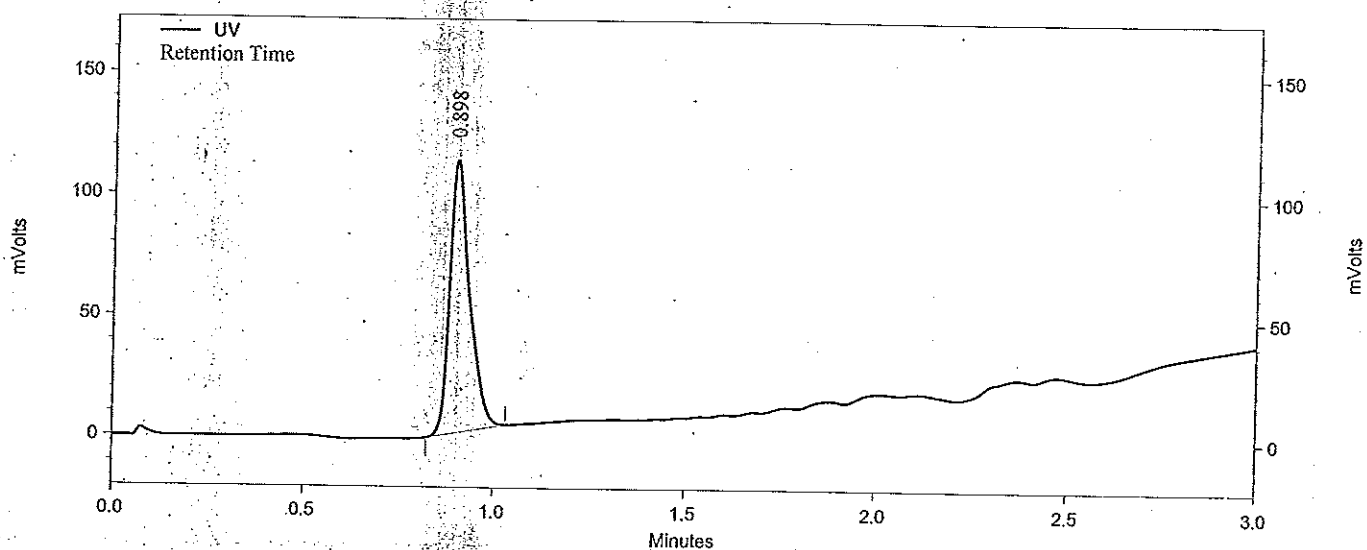

| UV Results |       |        |         |             |        |
|------------|-------|--------|---------|-------------|--------|
| PK #       | RT    | Area   | Area %  | Height (uV) | Plates |
| 1          | 0.898 | 410405 | 100.000 | 112774      | 1492   |
| Totals     |       | 410405 | 100.000 | 112774      |        |

Sample: 1  
File:0224I016  
Description:

Vial:1:A,1  
Date:24-Feb-2006

ID:184-12  
Time:09:45:38

Printed: Fri Feb 24 09:51:47 2006

### Sample Report:

uv 1.2e+005

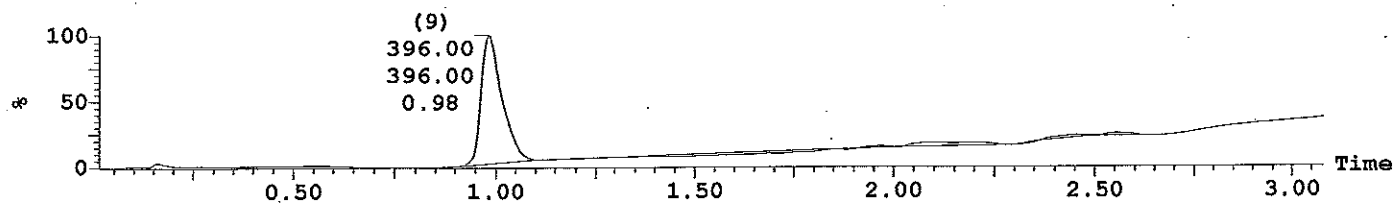

1: MS ES- :TIC Smooth (SG, 1x2) 1.3e+007

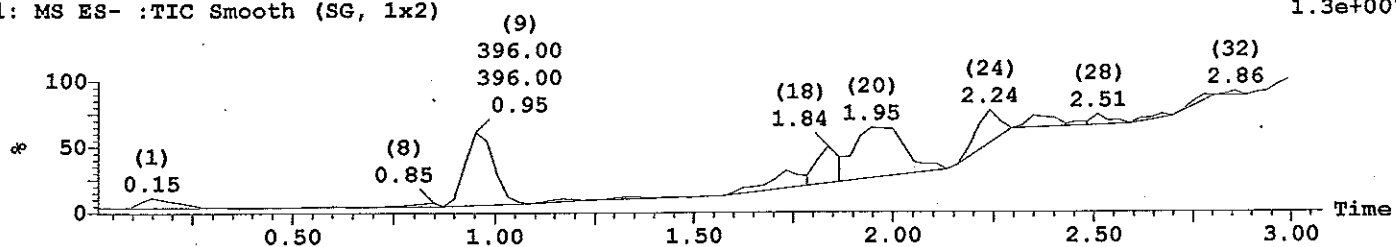

1: MS ES- :395 Smooth (SG, 1x2) 1.3e+004

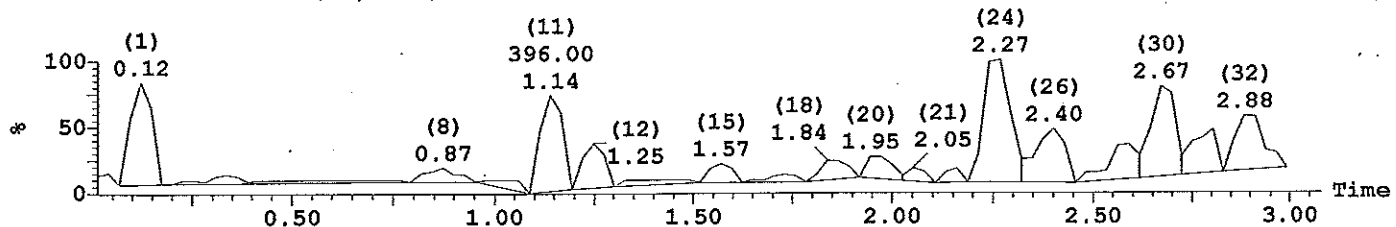

2: MS ES+ :TIC Smooth (SG, 1x2) 1.3e+008

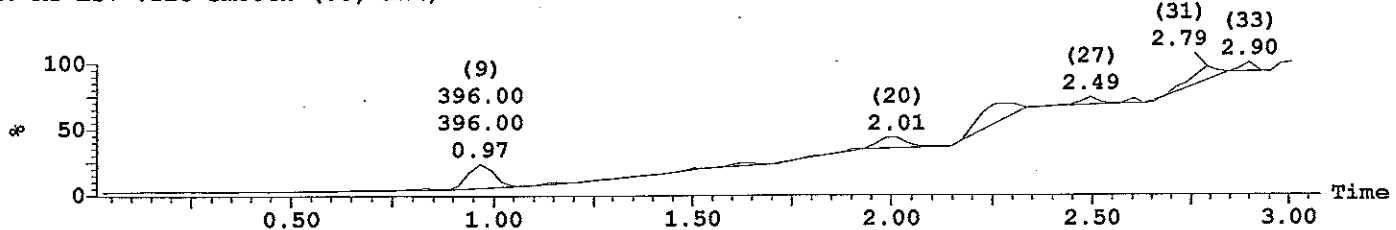

2: MS ES+ :397 Smooth (SG, 1x2) 7.7e+004

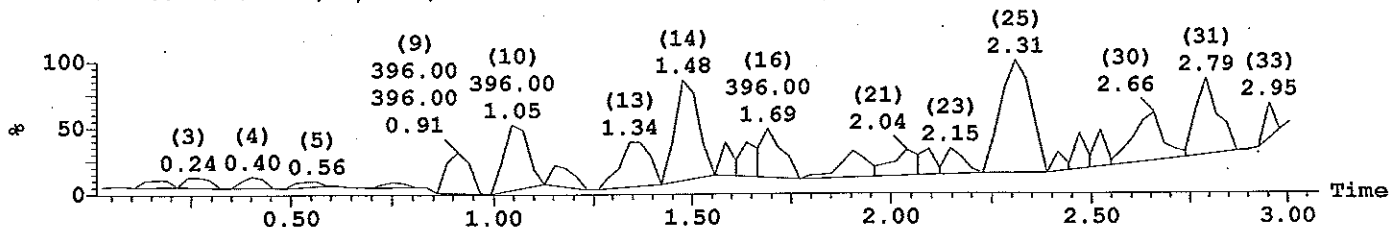



Sample: 1  
File:02241016  
Description:

Vial:1:A,1  
Date:24-Feb-2006

ID:184-12  
Time:09:45:38

Printed: Fri Feb 24 09:51:47 2006

Sample Report (continued):

Peak ID Time  
9 0.95  
Combine (35:39-(27:29+47:49)) 1:MS ES-  
1.3e+006

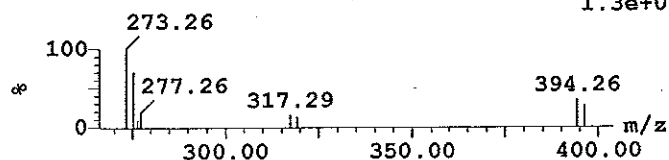

Peak ID Time  
9 0.95  
Combine (35:38-(26:28+47:49)) 2:MS ES+  
1.8e+006

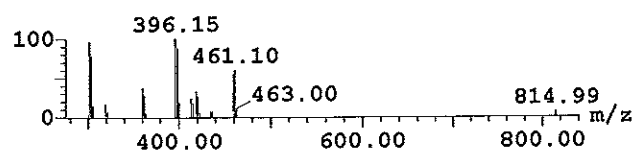

Peak ID Time  
20 1.95  
Combine (73:77-(65:66+86:87)) 2:MS ES+  
1.3e+006

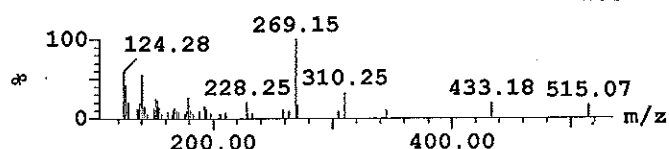

Peak ID Time  
22 2.09  
Combine (76:80-(70:71+85:86)) 2:MS ES+  
1.0e+006

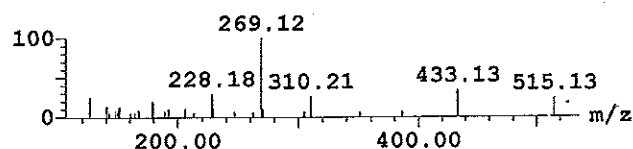

Peak ID Time  
23 2.16  
Combine (80:83-(68:69+91:93)) 2:MS ES+  
1.7e+006

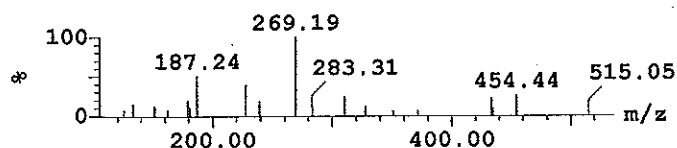

Peak ID Time  
24 2.24  
Combine (83:87-(74:75+93:94)) 2:MS ES+  
2.9e+006

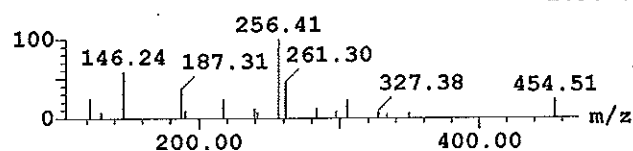

Peak ID Time  
26 2.45  
Combine (90:93-(81:82+98:100)) 2:MS ES+  
2.9e+006

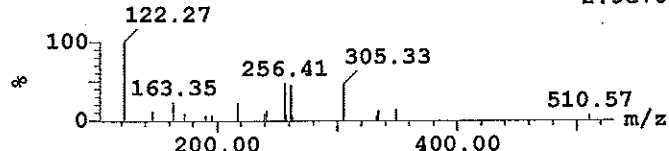

Peak ID Time  
27 2.50  
Combine (91:95-(82:83+101:102)) 2:MS ES+  
3.8e+006

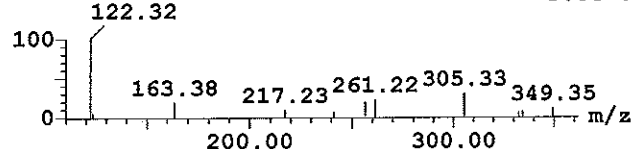

Peak ID Time  
28 2.51  
Combine (92:96-(86:87+101:102)) 2:MS ES+  
1.8e+006

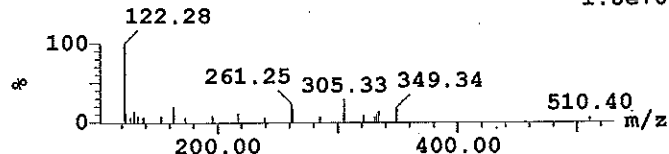

Peak ID Time  
29 2.59  
Combine (95:99-(88:89+104:105)) 2:MS ES+  
1.3e+006

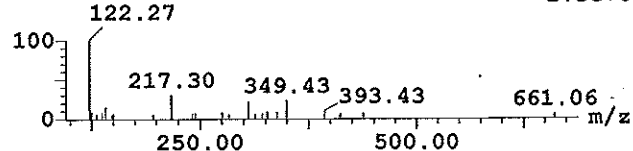

# Analytical HPLC Report

File: = C:\CLASS-VP\CHROM\0410Z.024  
 Sample ID: = 65859-038-19 MW 458  
 Acquired: = 4/10/2006 11:44:37 AM  
 User = weixu.zhai  
 Instrument = WFD-409D-LCMS2  
 Well = 190 Inj. Vol. = 10 uL  
 Start % B = 0  
 Final % B = 100  
 Gradient Time = 2 min  
 Flow Rate = 5 ml/min  
 Wavelength = 220  
 Solvent A = H2O : ACN 95% : 5% 10 mm Ammonium Acetate  
 Solvent B = H2O : ACN 5% : 95% 10 mm Ammonium Acetate  
 Column 2 = LUNA 3.0 x 50MM S10

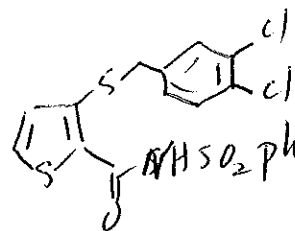

13

65859-038-19

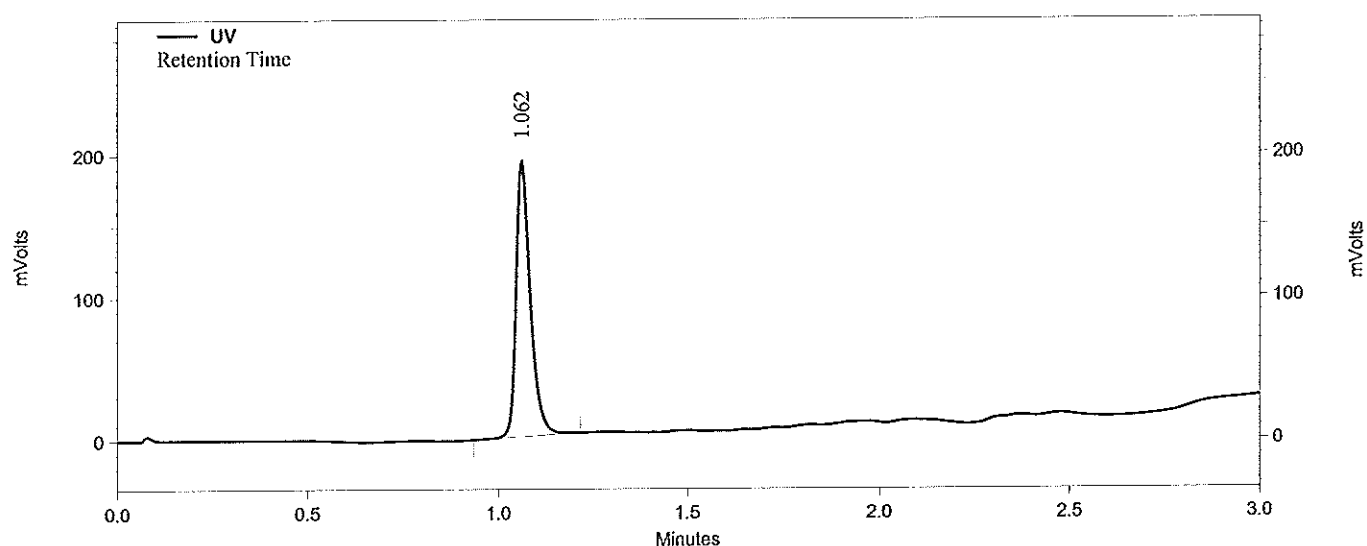

| UV Results |       |        |         |             |        |
|------------|-------|--------|---------|-------------|--------|
| Pk #       | RT    | Area   | Area %  | Height (uV) | Plates |
| 1          | 1.062 | 502787 | 100.000 | 193267      | 4050   |
| Totals     |       |        |         |             |        |
|            |       | 502787 | 100.000 | 193267      |        |

Sample: 1

Vial:1:A,1

ID:65859-038-19

File:0410Z024

Date:10-Apr-2006

Time:11:41:04

Description:

Printed: Mon Apr 10 11:47:13 2006

## Sample Report:

uv 2.0e+005

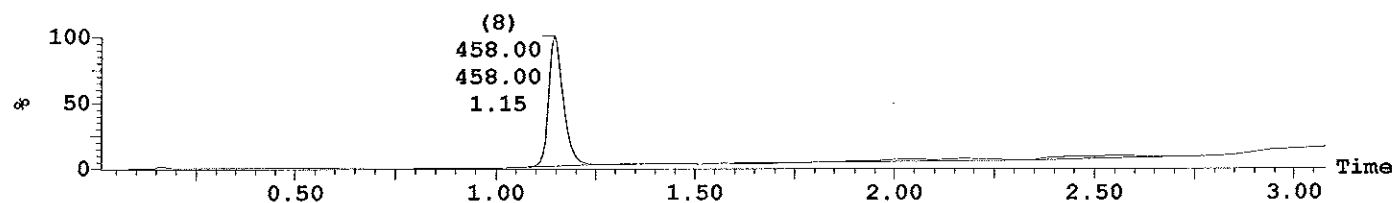

1: MS ES- :TIC Smooth (SG, 1x2)

6.9e+006

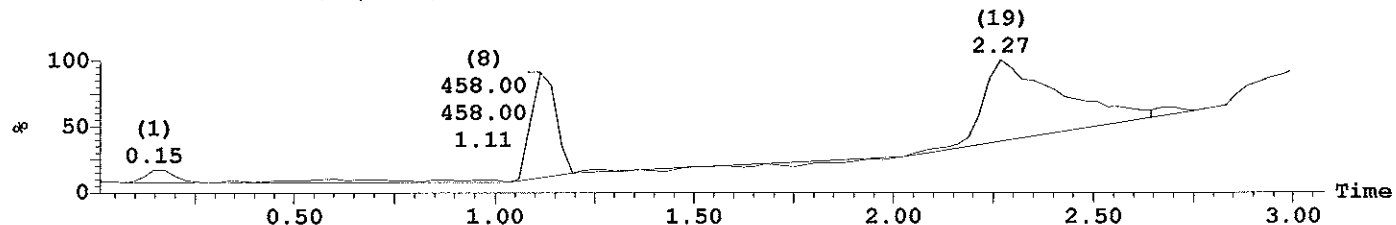

1: MS ES- :457 Smooth (SG, 1x2)

3.0e+004

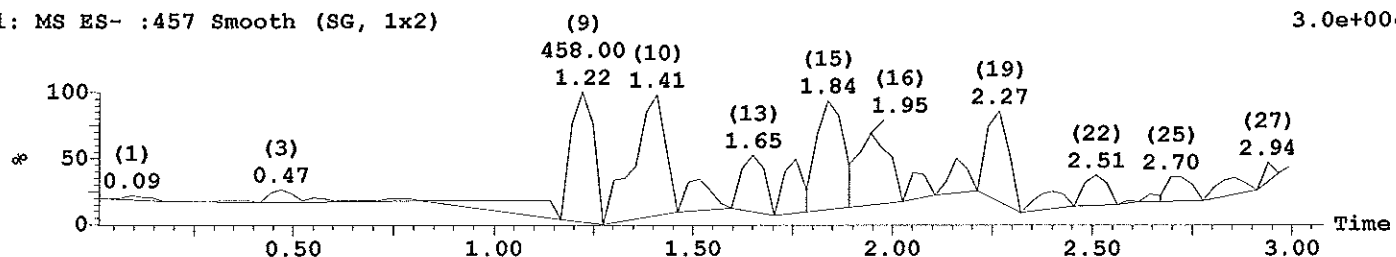

2: MS ES+ :TIC Smooth (SG, 1x2)

6.6e+007

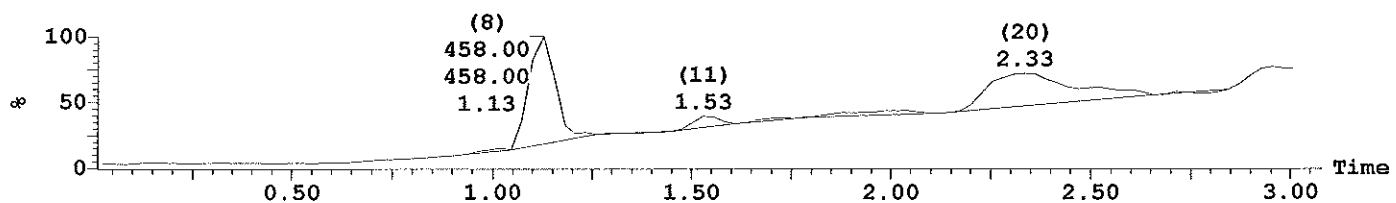

2: MS ES+ :459 Smooth (SG, 1x2)

5.5e+004

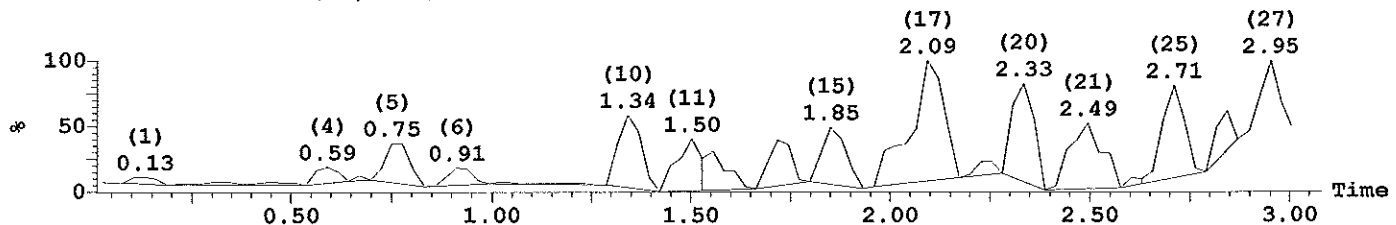

Sample: 1  
File:0410Z024  
Description:

Vial:1:A,1  
Date:10-Apr-2006

ID:65859-038-19  
Time:11:41:04

Printed: Mon Apr 10 11:47:13 2006

Sample Report (continued):

Peak ID Time  
8 1.11  
Combine (41:45-(31:33+53:55))

1:MS ES-  
1.3e+006

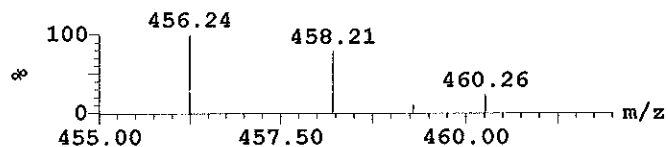

Peak ID Time  
8 1.11  
Combine (41:45-(30:32+53:55))

2:MS ES+  
4.9e+006

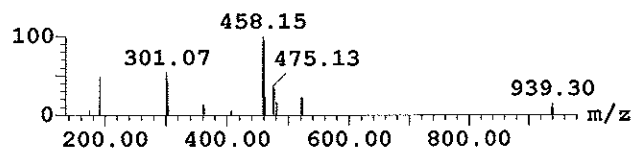

Peak ID Time  
15 1.84  
Combine (67:71-(60:61+78:79))

2:MS ES+  
6.3e+005

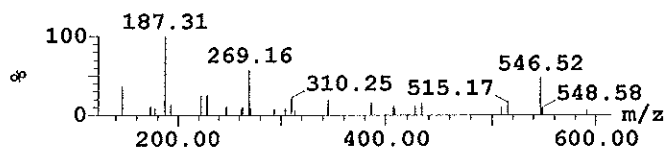

Peak ID Time  
17 2.05  
Combine (76:80-(66:67+87:88))

2:MS ES+  
1.0e+006

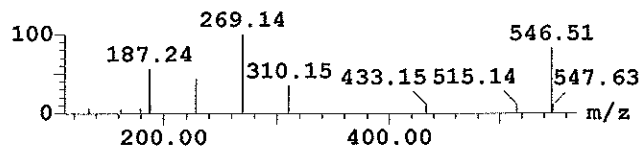

Peak ID Time  
19 2.27  
Combine (83:87-(69:70+105:106))

1:MS ES-  
4.8e+005

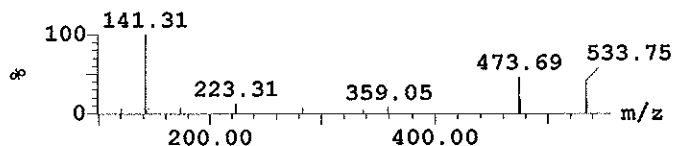

Peak ID Time  
19 2.27  
Combine (82:86-(74:75+91:92))

2:MS ES+  
4.6e+005

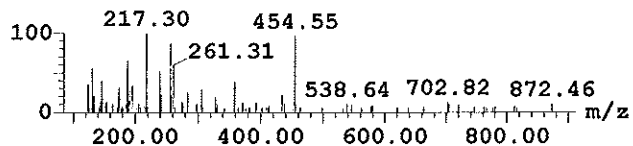

Peak ID Time  
20 2.40  
Combine (85:89-(73:74+105:106))

2:MS ES+  
2.7e+006

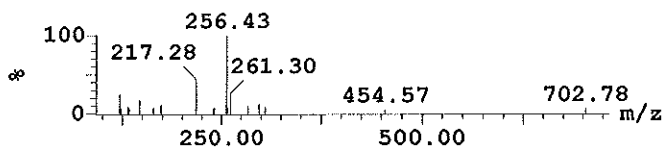

Peak ID Time  
21 2.50  
Combine (91:95-(82:83+102:103))

2:MS ES+  
7.0e+005

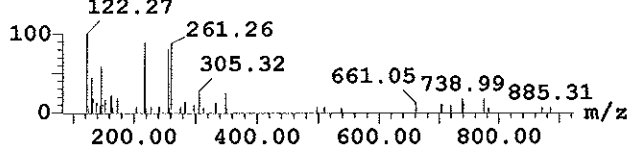

Peak ID Time  
25 2.70  
Combine (99:103-(91:92+110:111))

2:MS ES+  
7.6e+005

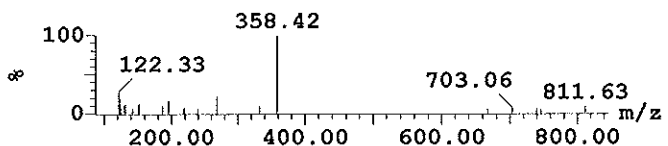

Peak ID Time  
26 2.86  
Combine (104:108-97:98)

2:MS ES+  
8.7e+005

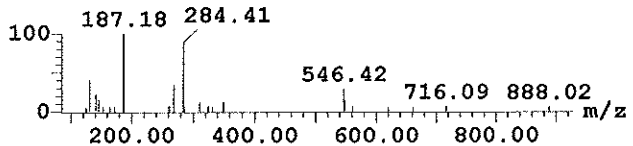

# Analytical HPLC Report

File: = C:\CLASS-VP\CHROM\0420H.023  
 Sample ID: = 47-2-6 MW 50  
 Acquired: = 4/20/2006 1:42:20 PM  
 User = weixu.zhai  
 Instrument = WFD-409D-LCMS2  
 Well = 188 Inj. Vol. = 10 uL  
 Start % B = 0  
 Final % B = 100  
 Gradient Time = 2 min  
 Flow Rate = 5 ml/min  
 Wavelength = 220  
 Solvent A = H2O : ACN 95% : 5% 10 mM Ammonium Acetate  
 Solvent B = H2O : ACN 5% : 95% 10 mM Ammonium Acetate  
 Column 2 = LUNA 3.0 x 50MM S10

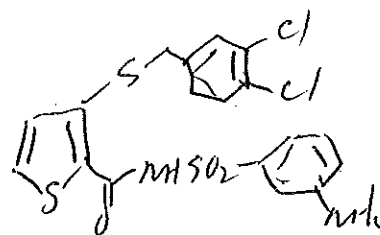

14

47-2-6

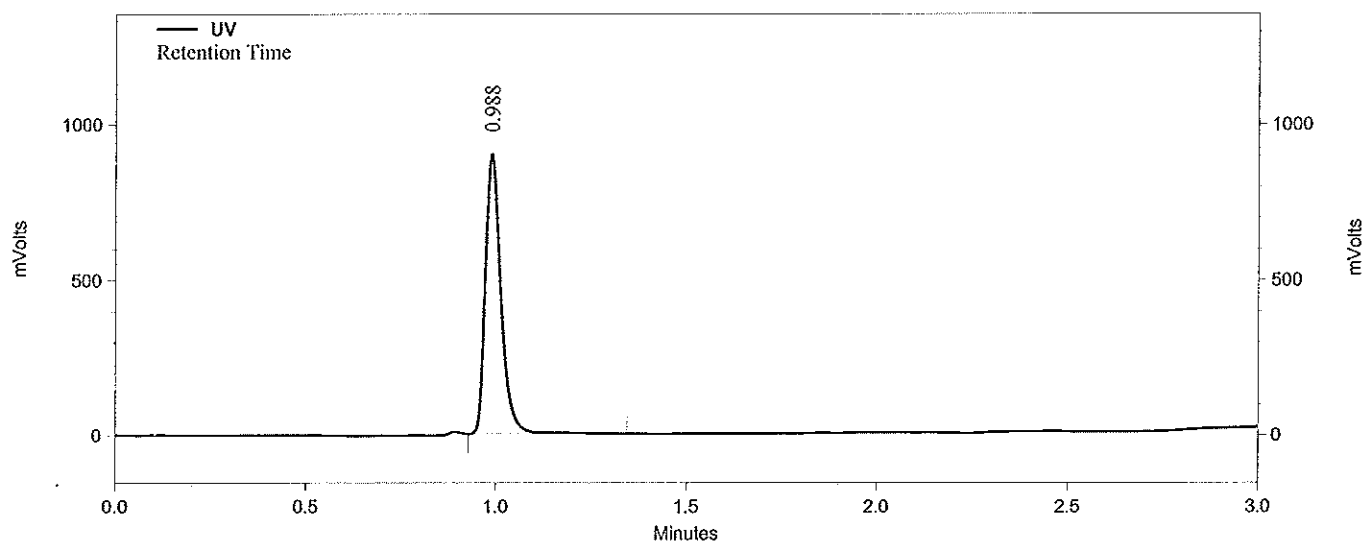

## UV Results

| PK #   | RT    | Area    | Area %  | Height (uV) | Plates |
|--------|-------|---------|---------|-------------|--------|
| 1      | 0.988 | 2579045 | 100.000 | 900288      | 2869   |
| Totals |       |         |         |             |        |
|        |       | 2579045 | 100.000 | 900288      |        |

Sample: 1  
File:0420H023  
Description:

Vial:1:A,1  
Date:20-Apr-2006

ID:47-2-6  
Time:13:38:37

Printed: Thu Apr 20 13:44:45 2006

### Sample Report:

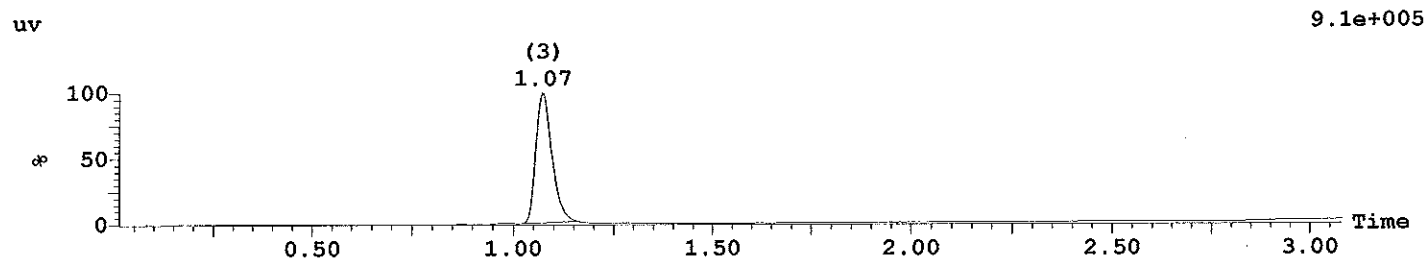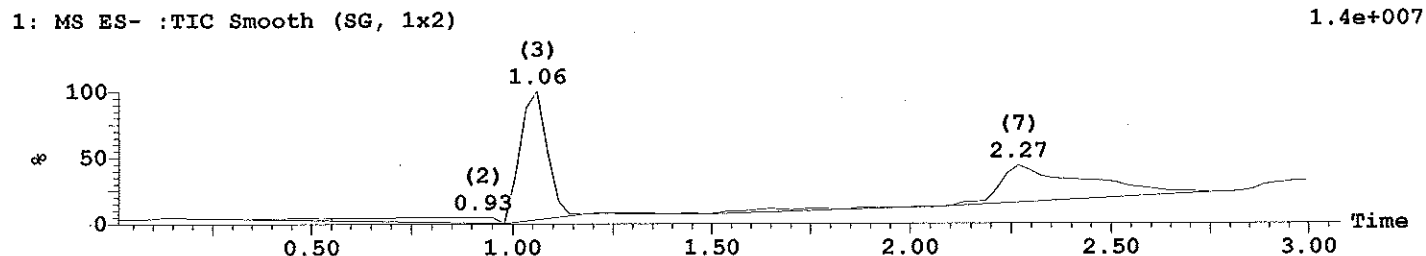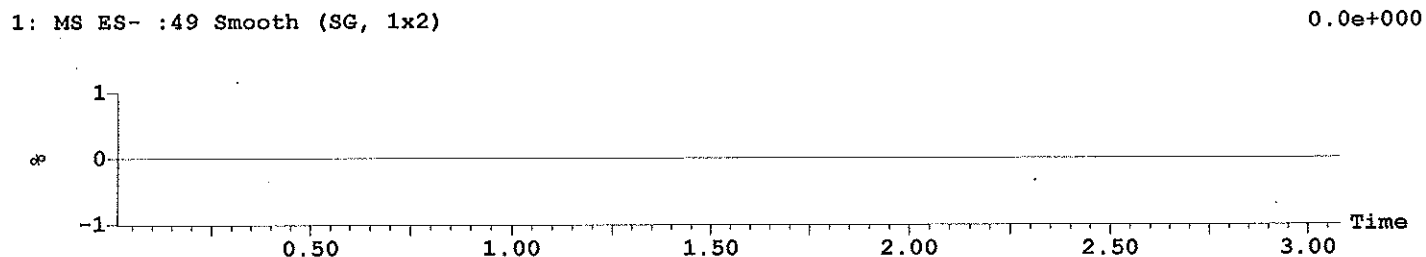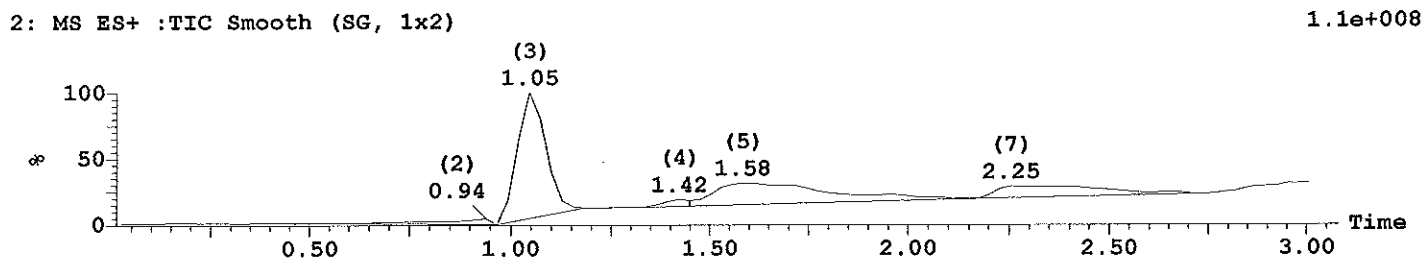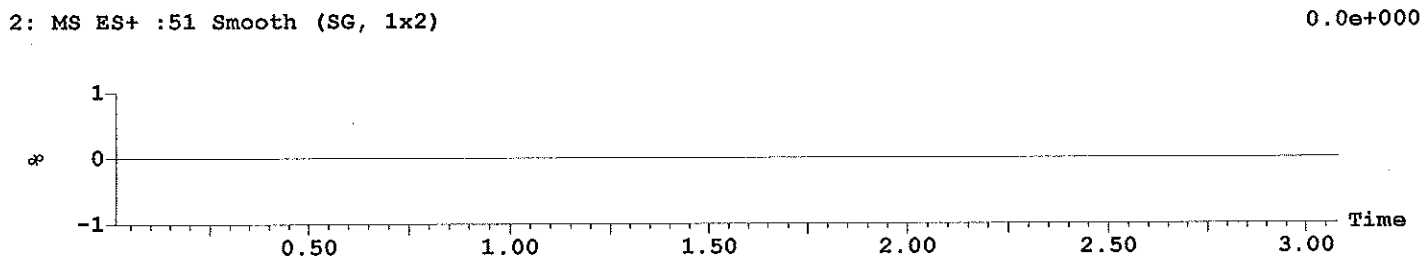

Sample: 1  
File:0420H023  
Description:

Vial:1:A,1  
Date:20-Apr-2006

ID:47-2-6  
Time:13:38:37

Printed: Thu Apr 20 13:44:45 2006

Sample Report (continued):

Peak ID Time  
1 0.50  
Combine (17:21-(6:7+27:28)) 1:MS ES-  
9.3e+003

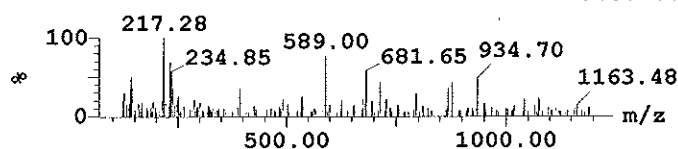

Peak ID Time  
2 0.93  
Combine (33:37-(14:15+43:44)) 1:MS ES-  
8.9e+003

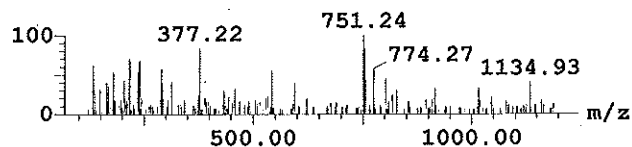

Peak ID Time  
2 0.93  
Combine (33:37-(10:11+42:43)) 2:MS ES+  
2.7e+005

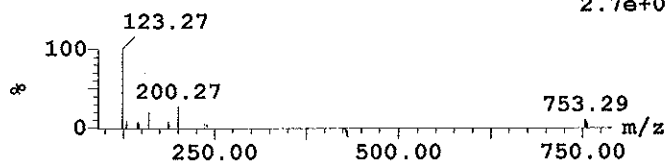

Peak ID Time  
3 1.06  
Combine (39:42-(31:33+49:51)) 1:MS ES-  
3.5e+006

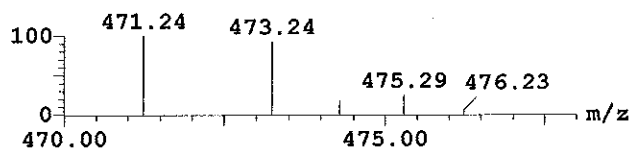

Peak ID Time  
3 1.06  
Combine (38:42-(30:32+49:51)) 2:MS ES+  
1.3e+007

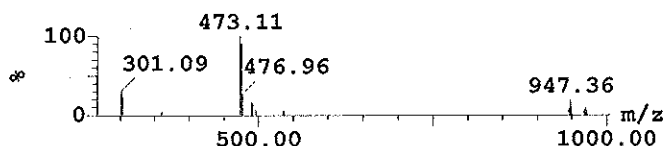

Peak ID Time  
4 1.42  
Combine (51:55-(42:43+60:61)) 2:MS ES+  
2.3e+006

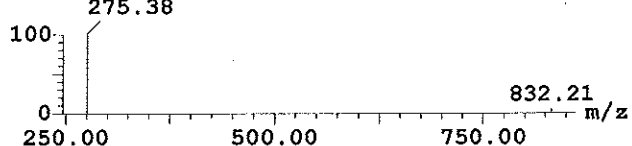

Peak ID Time  
5 1.65  
Combine (60:64-(49:50+70:71)) 1:MS ES-  
1.6e+004

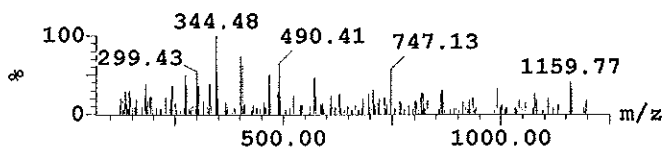

Peak ID Time  
5 1.65  
Combine (57:61-(47:48+87:88)) 2:MS ES+  
3.9e+006

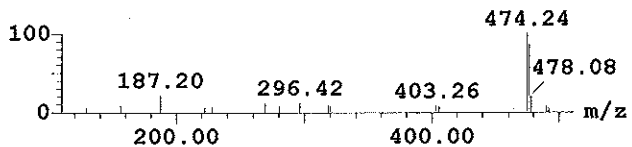

Peak ID Time  
6 1.76  
Combine (64:68-(57:58+75:76)) 1:MS ES-  
3.4e+004

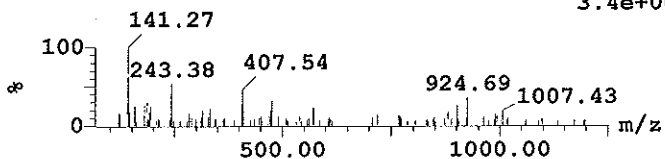

Peak ID Time  
7 2.27  
Combine (83:87-(71:72+109:110)) 1:MS ES-  
3.3e+005

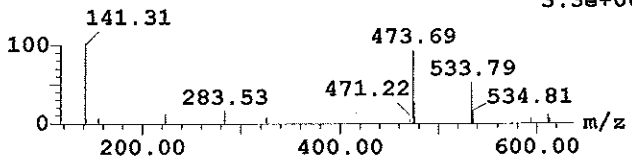

# Analytical HPLC Report

File: = C:\CLASS-VP\CHROM\05180.010  
 Sample ID: = 70-2-9 MW 532  
 Acquired: = 5/18/2006 10:53:42 AM  
 User = weixu.zhai  
 Instrument = WFD-409D-LCMS2  
 Well = 184 Inj. Vol. = 10 uL  
 Start % B = 0  
 Final % B = 100  
 Gradient Time = 2 min  
 Flow Rate = 5 ml/min  
 Wavelength = 220  
 Solvent A = H2O : ACN 95% : 5% 10 mM Ammonium Acetate  
 Solvent B = H2O : ACN 5% : 95% 10 mM Ammonium Acetate  
 Column 2 = LUNA 3.0 x 50MM S10

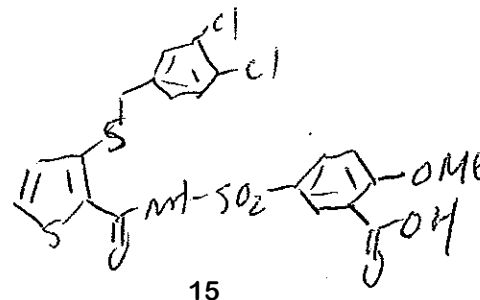

70-2-9

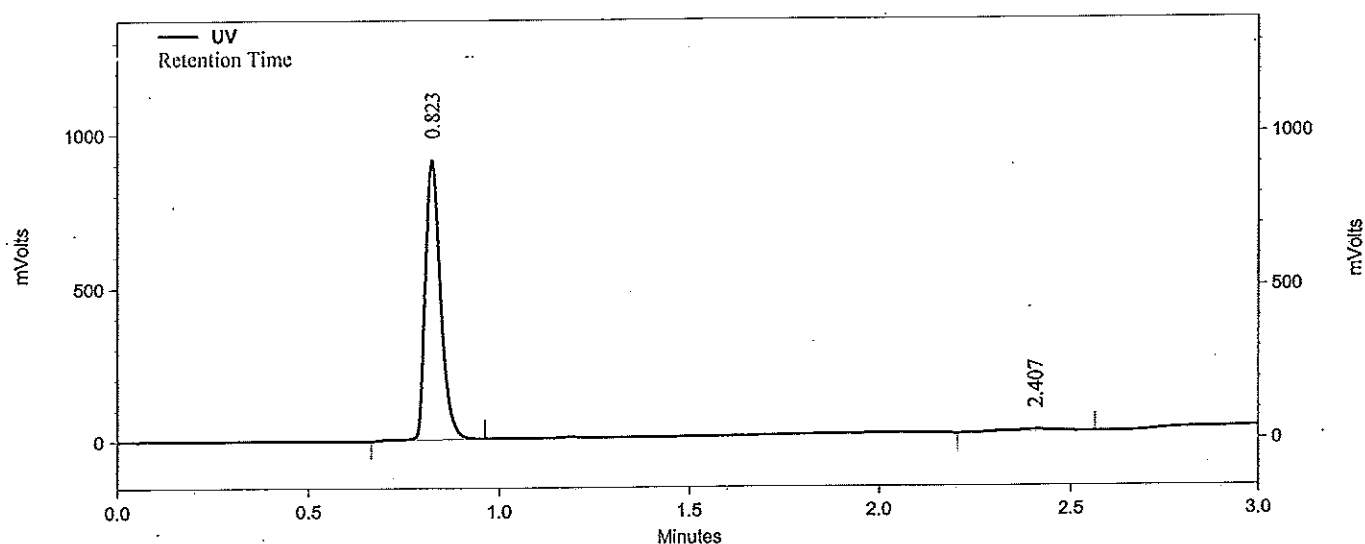

## UV Results

| Pk #   | RT    | Area    | Area %  | Height (uV) | Plates |
|--------|-------|---------|---------|-------------|--------|
| 1      | 0.823 | 2618509 | 96.942  | 910912      | 1899   |
| 2      | 2.407 | 82596   | 3.058   | 7994        | 1184   |
| Totals |       | 2701105 | 100.000 | 918906      |        |



Sample: 1  
File:05180010  
Description:

Vial:1:A,1  
Date:18-May-2006

ID:70-2-9  
Time:10:51:16

Printed: Thu May 18 10:55:37 2006

# Sample Report:

uv 9.2e+005

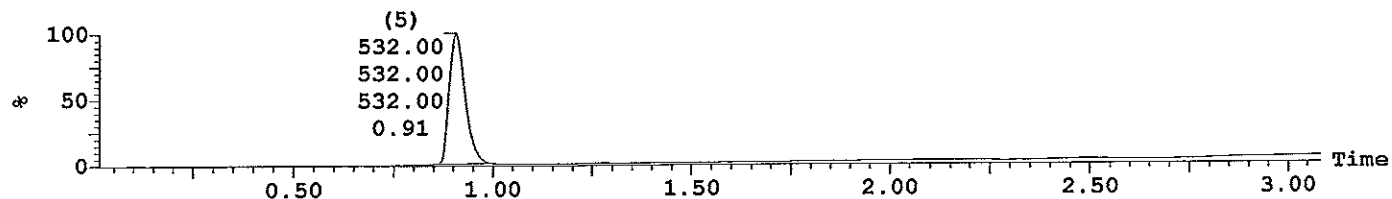

1: MS ES- :TIC Smooth (SG, 1x2) 1.2e+007

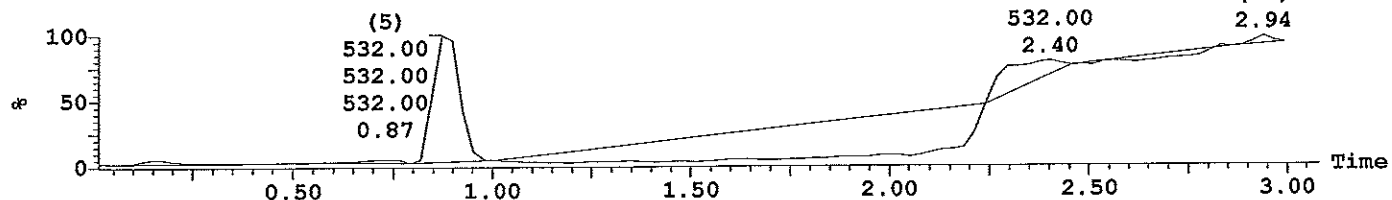

1: MS ES- :531 Smooth (SG, 1x2) 8.5e+004

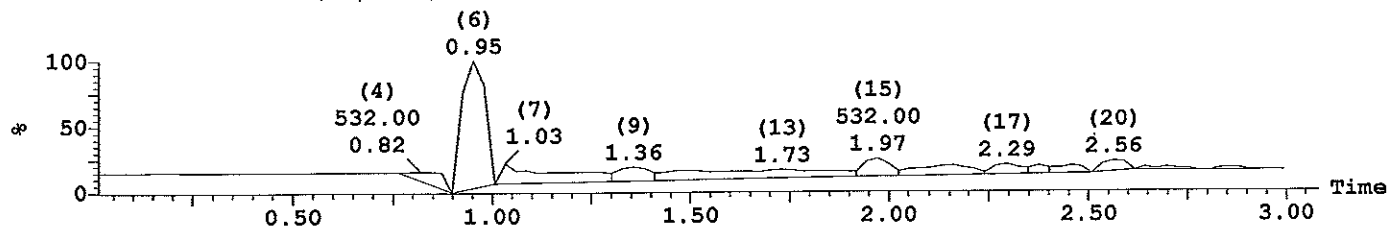

2: MS ES+ :TIC Smooth (SG, 1x2) 1.0e+008

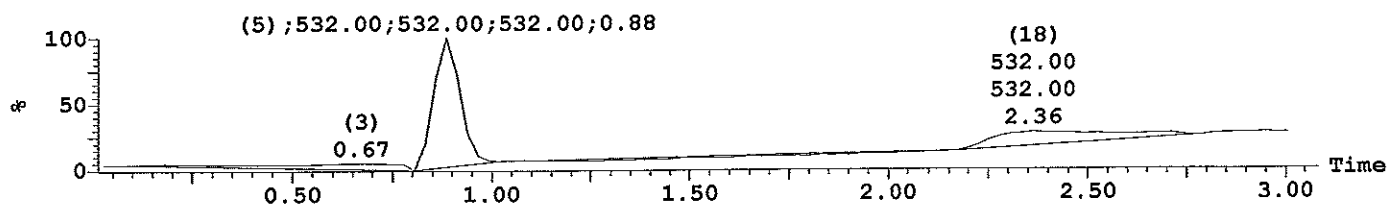

2: MS ES+ :533 Smooth (SG, 1x2) 8.2e+004

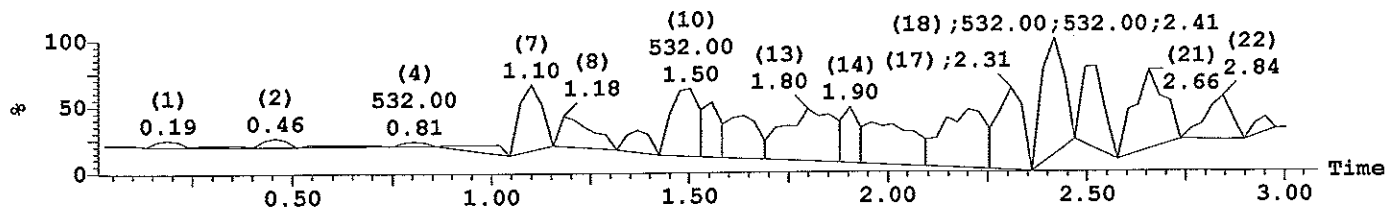

Sample: 1  
File:05180010  
Description:

Vial:1:A,1  
Date:18-May-2006

ID:70-2-9  
Time:10:51:16

Printed: Thu May 18 10:55:37 2006

Sample Report (continued):

Peak ID Time  
4 0.82  
Combine (28:32-(21:22+38:39))

2:MS ES+  
2.4e+006

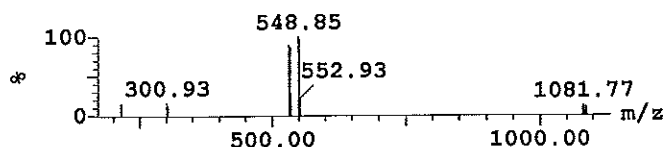

Peak ID Time  
5 0.87  
Combine (31:35-(23:24+44:45))

1:MS ES-  
2.5e+006

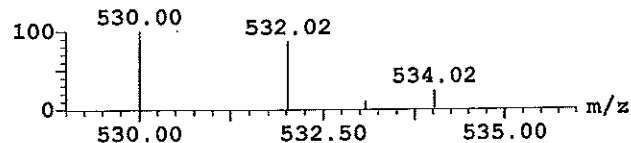

Peak ID Time  
5 0.87  
Combine (33:36-(24:26+43:45))

1:MS ES-  
2.9e+006

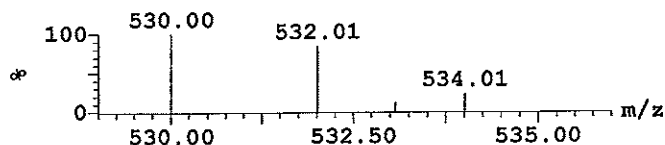

Peak ID Time  
5 0.87  
Combine (32:36-(24:26+43:44))

2:MS ES+  
9.4e+006

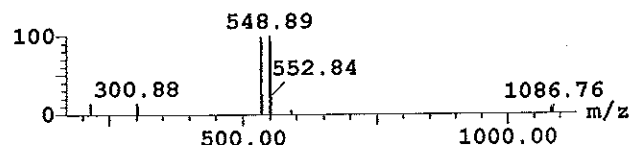

Peak ID Time  
15 1.97  
Combine (71:75-(65:66+84:85))

2:MS ES+  
4.1e+005

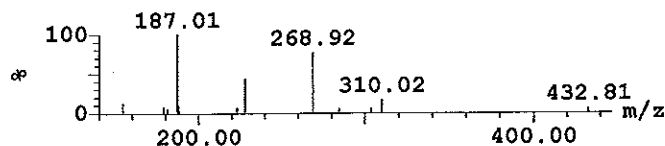

Peak ID Time  
16 2.16  
Combine (80:84-(71:72+90:91))

2:MS ES+  
4.1e+005

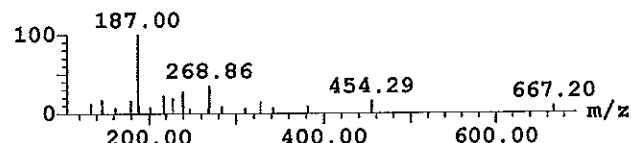

Peak ID Time  
17 2.29  
Combine (84:88-(77:78+94:95))

1:MS ES-  
4.1e+005

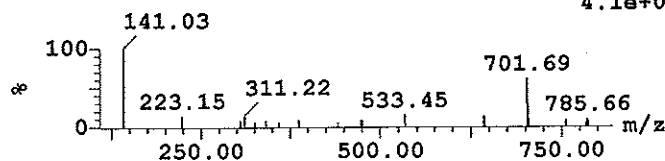

Peak ID Time  
18 2.40  
Combine (88:92-(77:78+98:99))

1:MS ES-  
5.0e+005

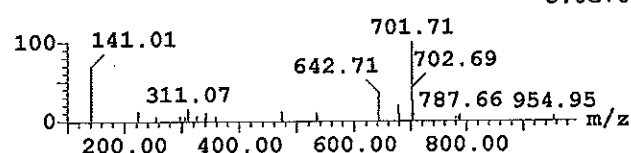

Peak ID Time  
22 2.86  
Combine (105:109-98:99)

1:MS ES-  
6.0e+005

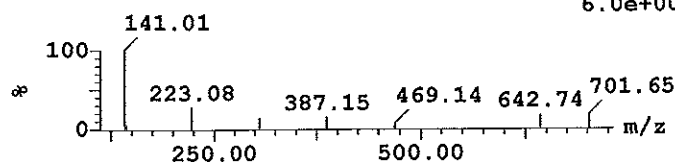

Peak ID Time  
22 2.86  
Combine (104:108-95:96)

2:MS ES+  
5.8e+005

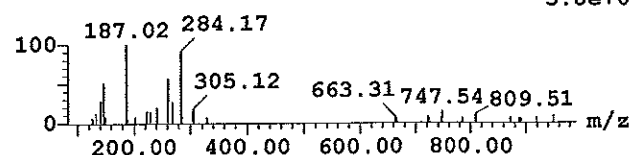

# Analytical HPLC Report

File: = C:\CLASS-VP\CHROM\0515I.012  
 Sample ID: = 66-3-29 MW 50  
 Acquired: = 5/15/2006 11:10:43 AM  
 User = weixu.zhai  
 Instrument = WFD-409D-LCMS2  
 Well = 192 Inj. Vol. = 10 uL  
 Start % B = 0  
 Final % B = 100  
 Gradient Time = 2 min  
 Flow Rate = 5 ml/min  
 Wavelength = 220  
 Solvent A = H2O : ACN 95% : 5% 10 mm Ammonium Acetate  
 Solvent B = H2O : ACN 5% : 95% 10 mm Ammonium Acetate  
 Column 2 = LUNA 3.0 x 50MM S10

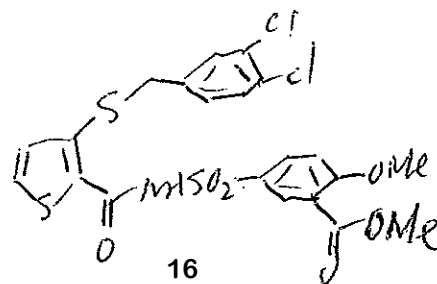

66-3-29

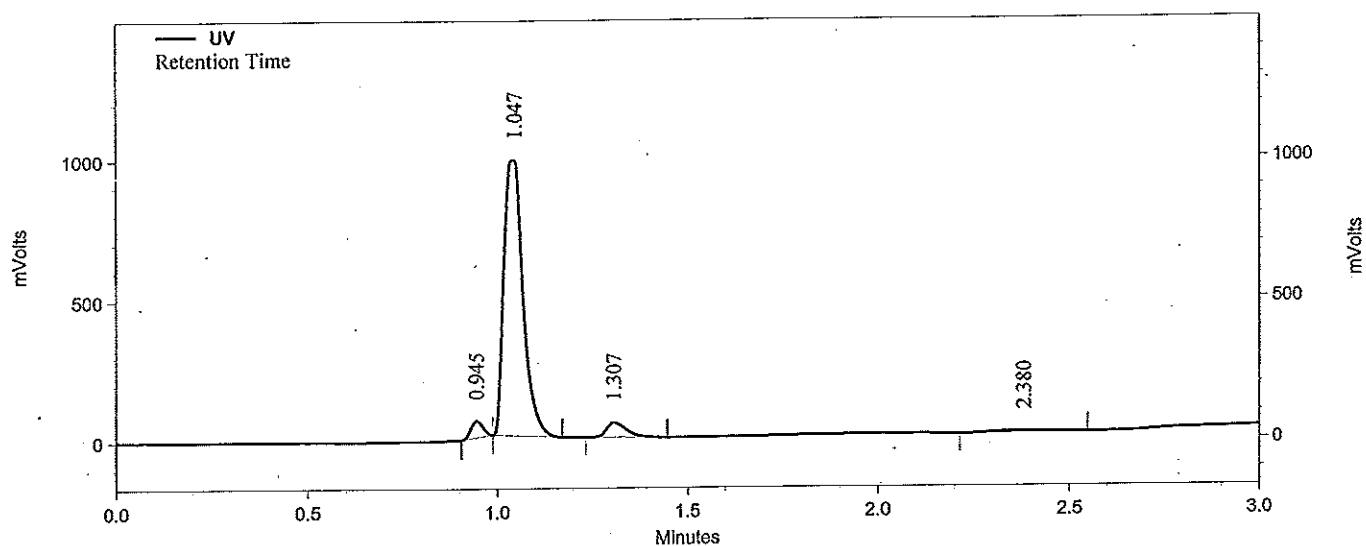

| UV Results |       |         |         |             |        |  |
|------------|-------|---------|---------|-------------|--------|--|
| Pk #       | RT    | Area    | Area %  | Height (uV) | Plates |  |
| 1          | 0.945 | 134641  | 3.536   | 59253       | 3652   |  |
| 2          | 1.047 | 3408325 | 89.523  | 977312      | 2424   |  |
| 3          | 1.307 | 195240  | 5.128   | 52268       | 2832   |  |
| 4          | 2.380 | 68995   | 1.812   | 6531        | 1089   |  |
| Totals     |       | 3807201 | 100.000 | 1095364     |        |  |

Open  
Sample  
File: 12  
Des: 1

Vial: 1:A,1  
Date: 15-May-2006

ID: 13-29  
Time: 11:08:47

Page 1

Print: 1x1

Sample Type

uv 1.0e+006

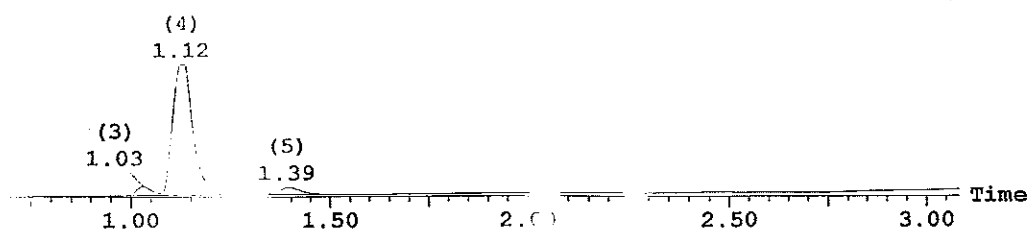

1: 1x2) 3.2e+006

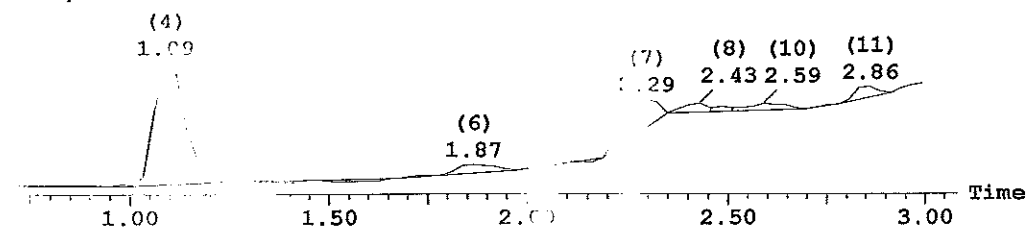

1: 1x2) 0.0e+000

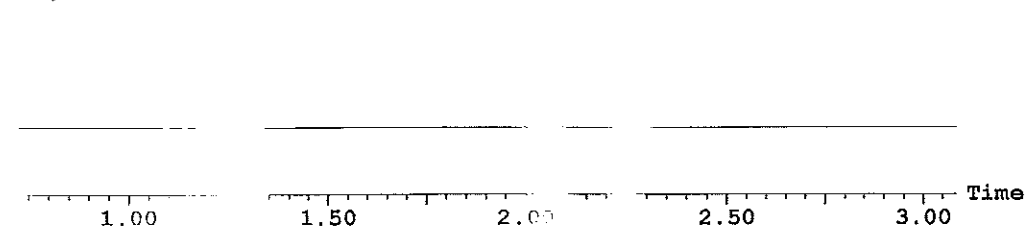

2: 1x2) 4.9e+007

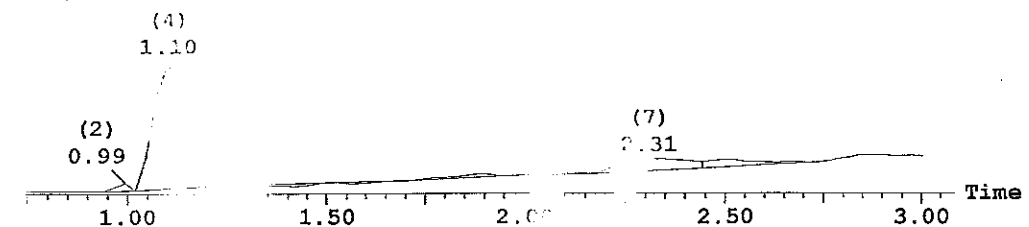

2: 1x2) 0.0e+000

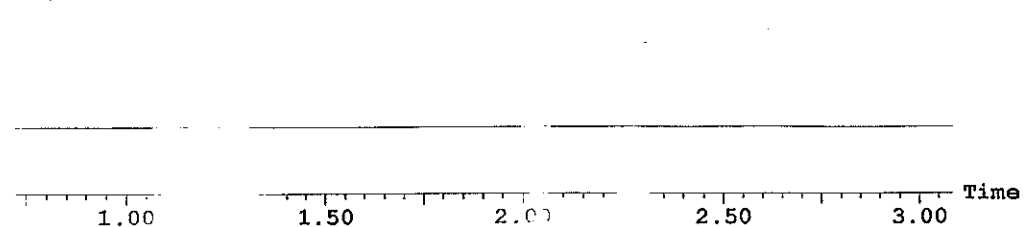

Op: \_\_\_\_\_  
 Sar: \_\_\_\_\_  
 File: \_\_\_\_\_  
 Des: \_\_\_\_\_

Vial:1:3:1  
Date:10-11-2016

ID:66-3-29  
Time:11:08:47

Primer

San

| Peak ID | Time |
|---------|------|
| 3       | 1.0  |

Combine (37: 1-(27:29+46:48)) 1:MS ES-  
4.1e+005

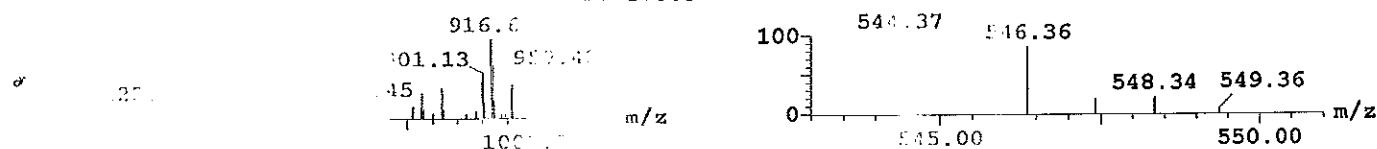

| Peak ID | Time |
|---------|------|
| 4       | 1.1  |

Combine (41:33:35+54:56)) 1:MS ES-  
7.4e+005

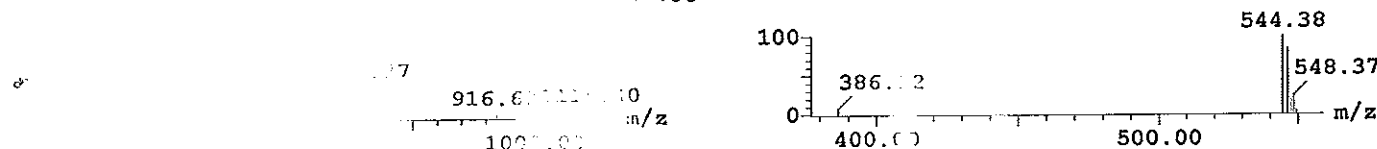

| Peak ID | Time |
|---------|------|
| 6       | 1.8  |

Combine (61:79)-(57:58+79:80))

2:MS ES+  
2.0e+005

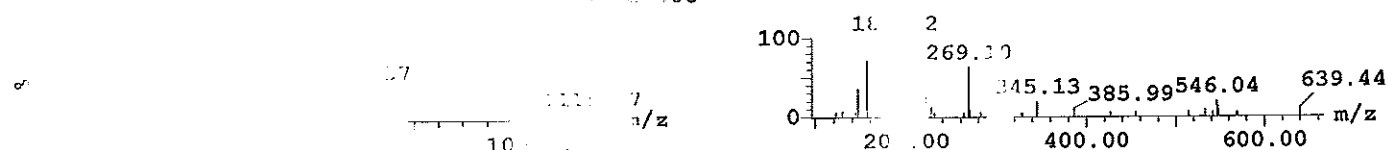

| Peak ID | Time |
|---------|------|
| 7       | 2.2  |

Combine (84) = (74:75+97:98)

2:MS ES+  
7.2e+005

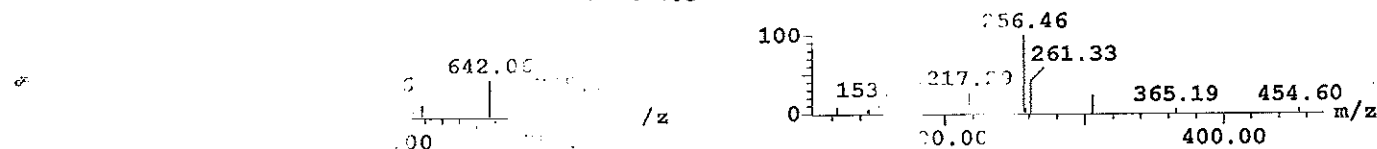

| Peak ID | Time |
|---------|------|
| 10      | 2.9  |

Combine (93:7)-(84:95+107:108)) 2:MS ES+  
1.7e+005

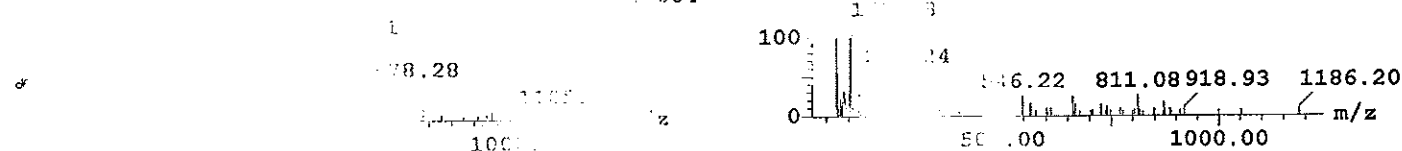

# Analytical HPLC Report

File: = C:\CLASS-VP\CHROM\0224I.015  
 Sample ID: = 183-19 MW 313  
 Acquired: = 2/24/2006 9:43:29 AM  
 User = weixu.zhai  
 Instrument = WFD-409D-LCMS2  
 Well = 104 Inj. Vol. = 10 uL  
 Start % B = 0  
 Final % B = 100  
 Gradient Time = 2 min  
 Flow Rate = 5 ml/min  
 Wavelength = 220  
 Solvent A = H2O : ACN 95% : 5% 10 mM Ammonium Acetate  
 Solvent B = H2O : ACN 5% : 95% 10 mM Ammonium Acetate  
 Column 2 = LUNA 3.0 x 50MM S10

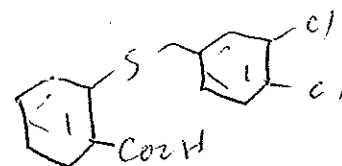

17

183-19

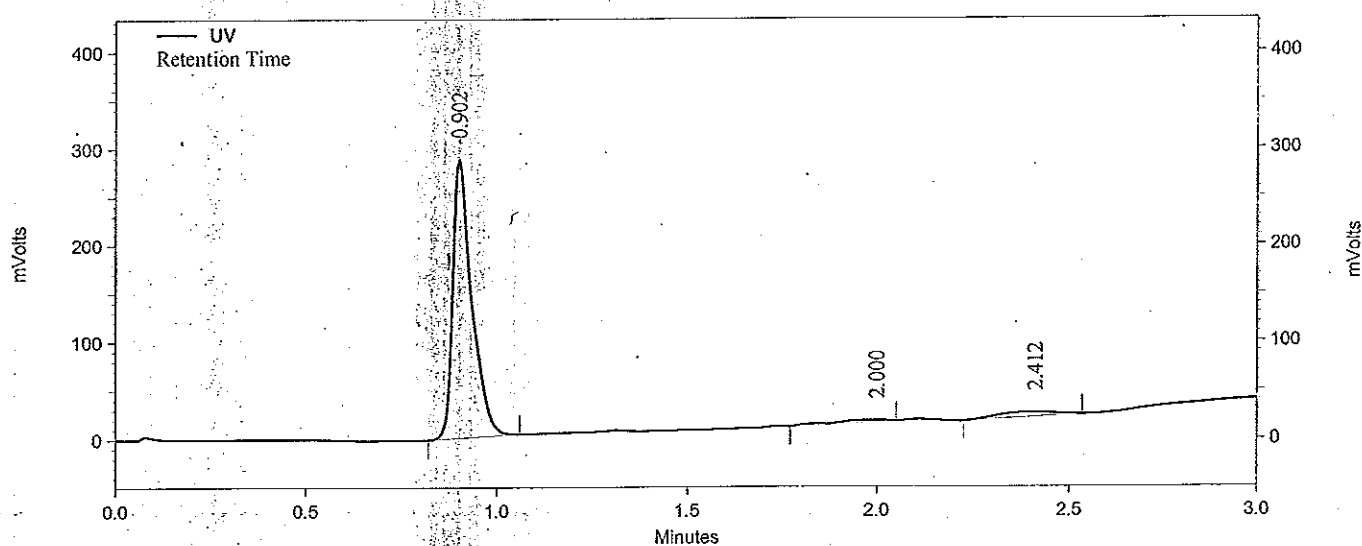

| UV Results |       |         |         |             |        |  |
|------------|-------|---------|---------|-------------|--------|--|
| Pk #       | RT    | Area    | Area %  | Height (uV) | Plates |  |
| 1          | 0.902 | 969904  | 92.960  | 286863      | 1880   |  |
| 2          | 2.000 | 20758   | 1.990   | 1768        | 2024   |  |
| 3          | 2.412 | 52696   | 5.051   | 4737        | 1211   |  |
| Totals     |       | 1043358 | 100.000 | 293368      |        |  |

Sample: 1  
File:0224I015  
Description:

Vial:1:A,1  
Date:24-Feb-2006

ID:183-19  
Time:09:40:48

Printed: Fri Feb 24 09:45:04 2006

### Sample Report:

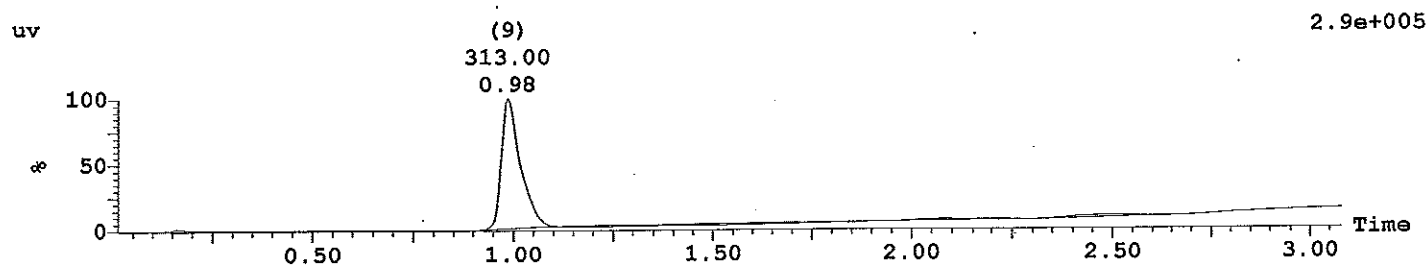

1: MS ES- :TIC Smooth (SG, 1x2)

1.5e+007

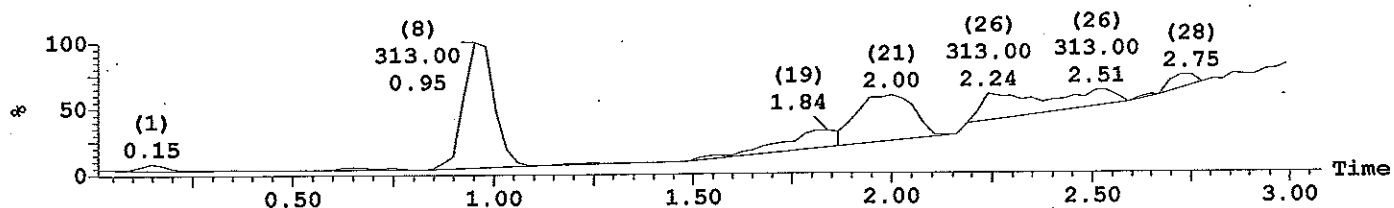

1: MS ES- :312 Smooth (SG, 1x2)

8.8e+004

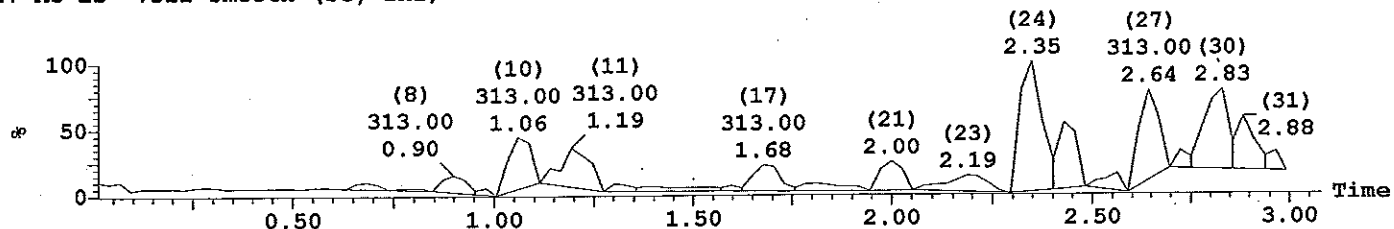

2: MS ES+ :TIC Smooth (SG, 1x2)

1.3e+008

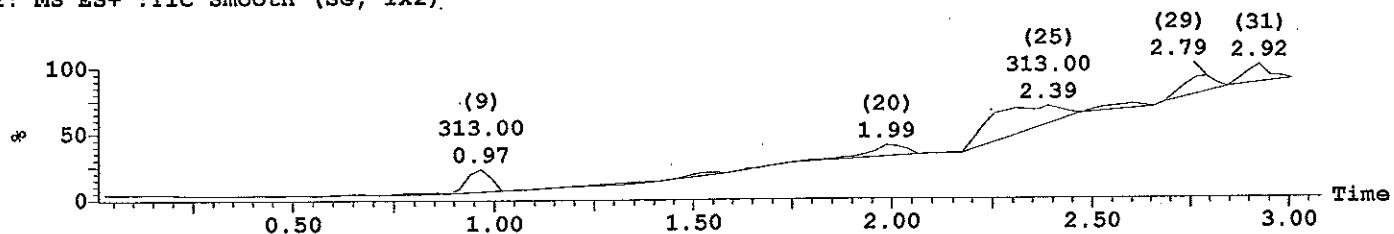

2: MS ES+ :314 Smooth (SG, 1x2)

1.7e+005

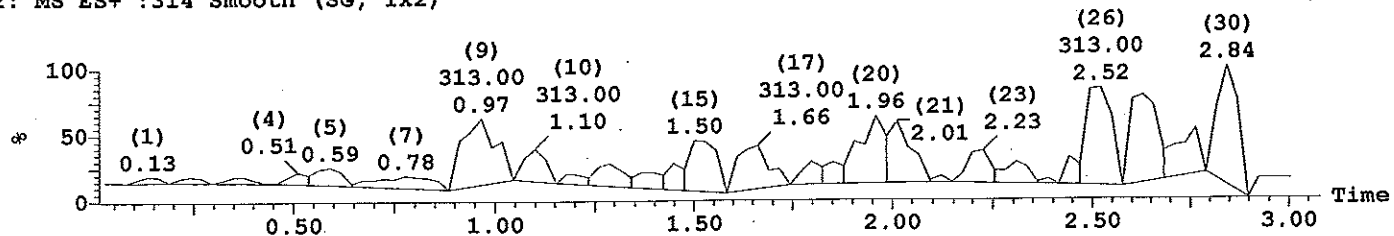

Sample: 1  
File:02241015  
Description:

Vial:1:A,1  
Date:24-Feb-2006

ID:183-19  
Time:09:40:48

Printed: Fri Feb 24 09:45:04 2006

Sample Report (continued):

Peak ID Time  
8 0.95  
Combine (34:38-(24:25+48:49)) 1:MS ES-  
2.3e+006

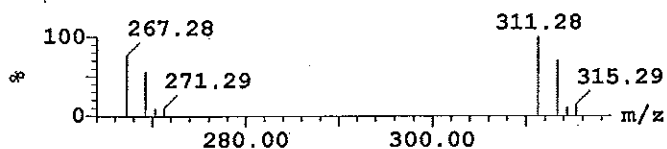

Peak ID Time  
9 0.98  
Combine (35:39-(27:29+47:49)) 1:MS ES-  
2.4e+006

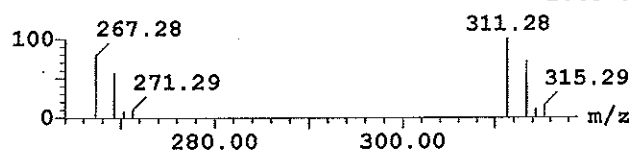

Peak ID Time  
9 0.98  
Combine (35:39-(26:28+46:48)) 2:MS ES+  
3.5e+006

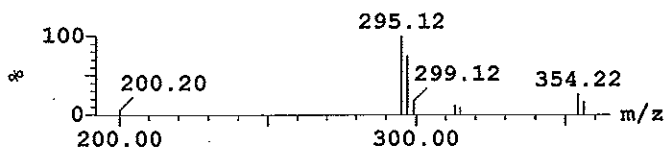

Peak ID Time  
15 1.54  
Combine (54:58-(48:49+65:66)) 2:MS ES+  
1.1e+006

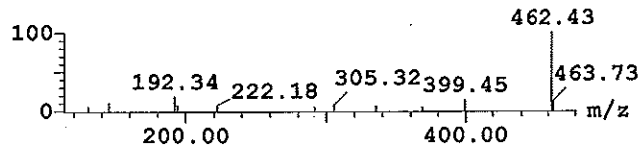

Peak ID Time  
23 2.19  
Combine (81:85-(73:74+90:91)) 2:MS ES+  
1.7e+006

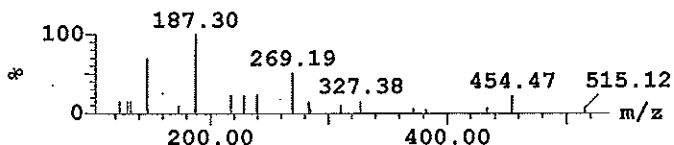

Peak ID Time  
24 2.35  
Combine (84:88-(77:78+94:95)) 2:MS ES+  
2.6e+006

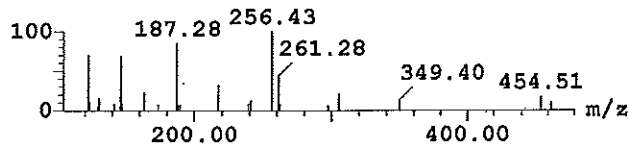

Peak ID Time  
25 2.43  
Combine (87:91-(74:75+98:99)) 2:MS ES+  
3.8e+006

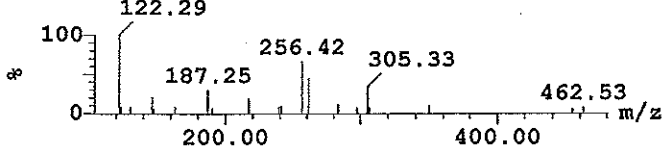

Peak ID Time  
26 2.51  
Combine (92:96-(85:86+102:103)) 2:MS ES+  
8.6e+005

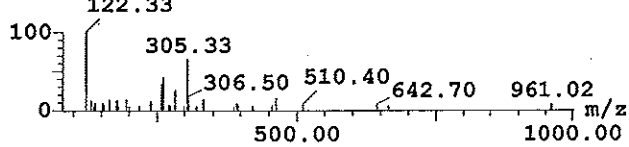

Peak ID Time  
29 2.79  
Combine (102:106-(93:94+112)) 2:MS ES+  
5.4e+006

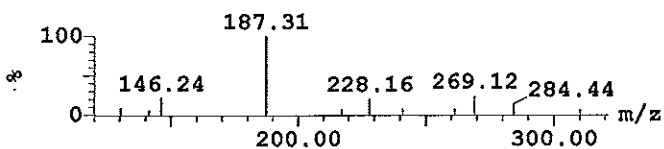

Peak ID Time  
30 2.83  
Combine (104:108-96:97) 1:MS ES-  
9.3e+005

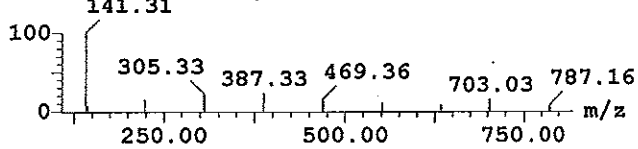



# Analytical HPLC Report

File: = C:\CLASS-VP\CHROM\0511M.042  
 Sample ID: = 65859-061-01 MW 390  
 Acquired: = 5/11/2006 4:37:26 PM  
 User = weixu.zhai  
 Instrument = WFD-409D-LCMS  
 Well = 192 Inj. Vol. = 5 uL  
 Start % B = 0  
 Final % B = 100  
 Gradient Time = 2 min  
 Flow Rate = 5 ml/min  
 Wavelength = 220  
 Solvent A = 10% MeOH - 90% H2O - 0.1% TFA  
 Solvent B = 90% MeOH - 10% H2O - 0.1% TFA  
 Column 1 = (1) Phenomenex 10u C18 3.0X50mm

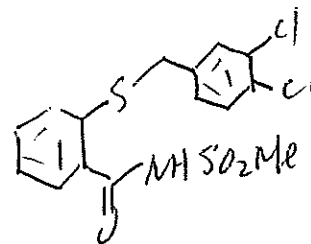

18

65859-061-01

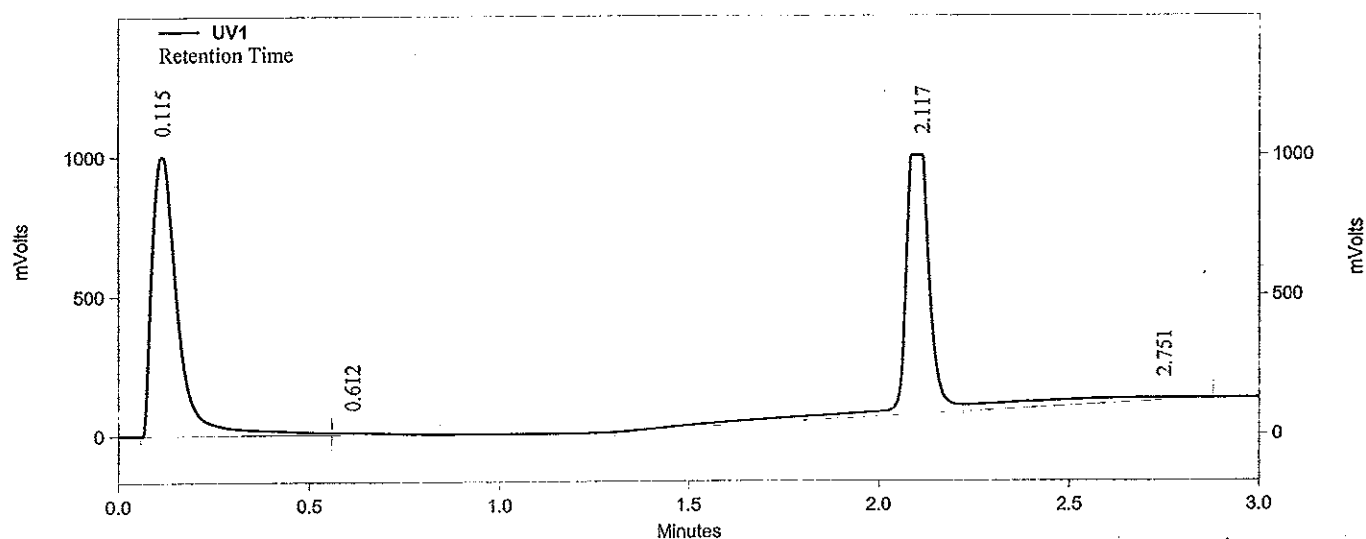

| UV1 Results |       |         |         |             |        |  |
|-------------|-------|---------|---------|-------------|--------|--|
| Pk #        | RT    | Area    | Area %  | Height (uV) | Plates |  |
| 1           | 0.115 | 4759938 | 48.029  | 999026      | 17     |  |
| 2           | 0.612 | 63322   | 0.639   | 7333        | 0      |  |
| 3           | 2.117 | 4403798 | 44.436  | 928873      | 8831   |  |
| 4           | 2.751 | 683426  | 6.896   | 10099       | 0      |  |
| Totals      |       | 9910484 | 100.000 | 1945331     |        |  |

Sample: 1  
File:0511M042  
Description:

Vial:1:A,1  
Date:11-May-2006

ID:65859-061-01  
Time:16:33:52

Printed: Thu May 11 16:39:13 2006

### Sample Report:

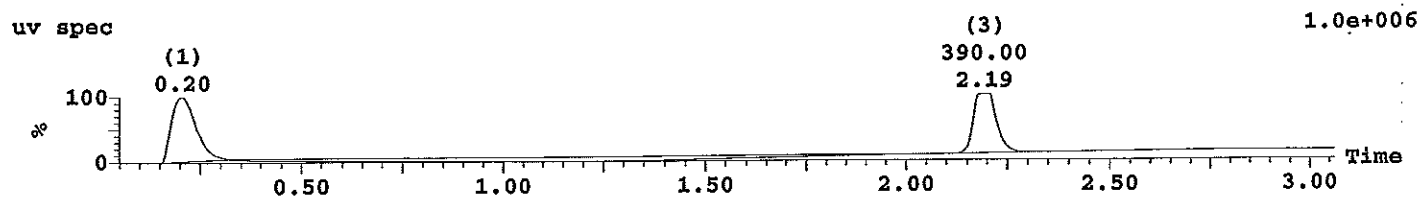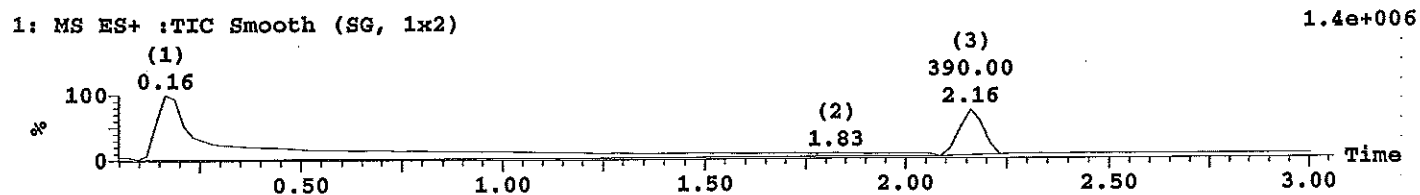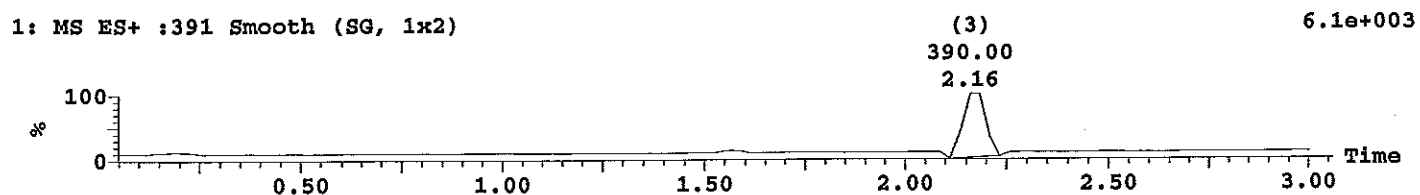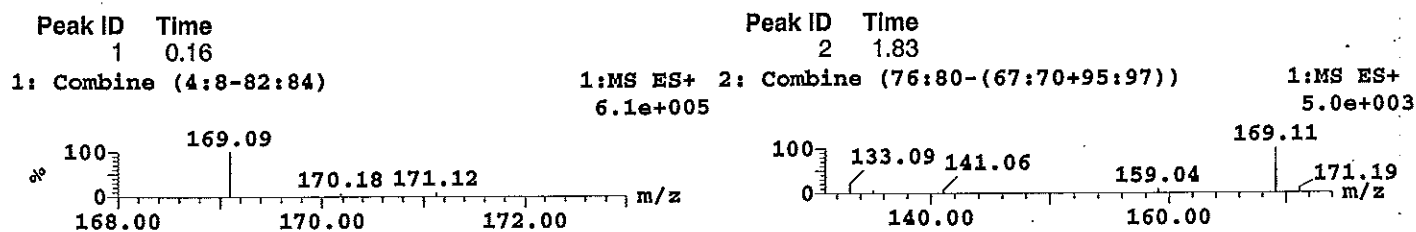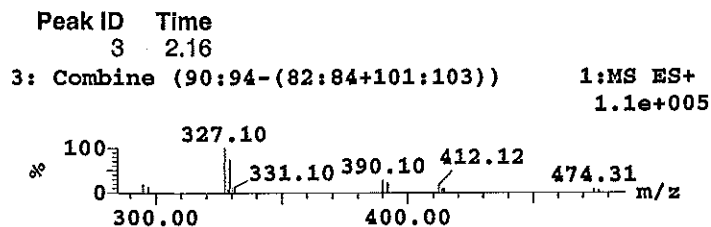

# Analytical HPLC Report

File: = C:\CLASS-VP\CHROM\0713R.035  
 Sample ID: = 119-53 MW 392  
 Acquired: = 7/13/2006 2:41:03 PM  
 User = weixu.zhai  
 Instrument = WFD-409D-LCMS2  
 Well = 191 Inj. Vol. = 10 uL  
 Start % B = 0  
 Final % B = 100  
 Gradient Time = 2 min  
 Flow Rate = 5 ml/min  
 Wavelength = 220  
 Solvent A = H2O : ACN 95% : 5% 10 mM Ammonium Acetate  
 Solvent B = H2O : ACN 5% : 95% 10 mM Ammonium Acetate  
 Column 2 = LUNA 3.0 x 50MM S10

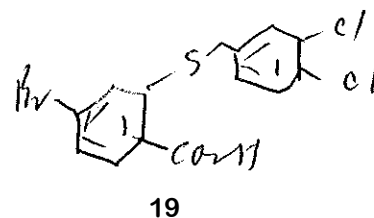

119-53

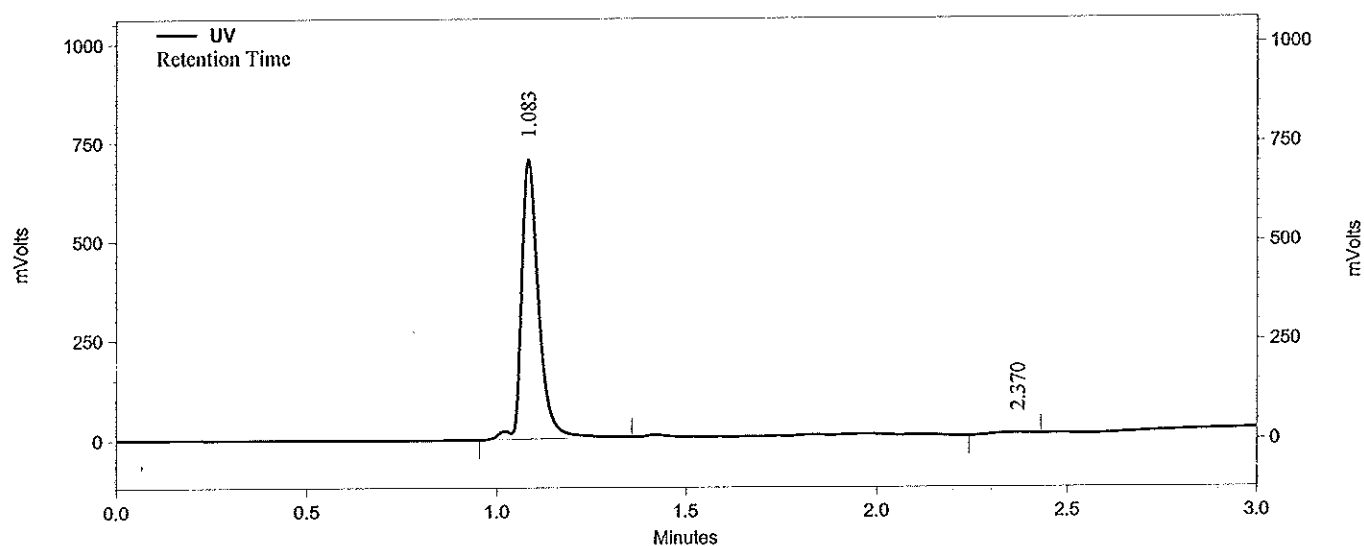

## UV Results

| Pk #   | RT    | Area    | Area %  | Height (uV) | Plates |
|--------|-------|---------|---------|-------------|--------|
| 1      | 1.083 | 2272724 | 99.121  | 705259      | 2916   |
| 2      | 2.370 | 20160   | 0.879   | 3138        | 3688   |
| Totals |       | 2292884 | 100.000 | 708397      |        |

Sample: 1  
File:0713R035  
Description:

Vial:1:A,1  
Date:13-Jul-2006

ID:119-53  
Time:14:35:38

Printed: Thu Jul 13 14:41:49 2006

## Sample Report:

Channel 1

7.1e+005

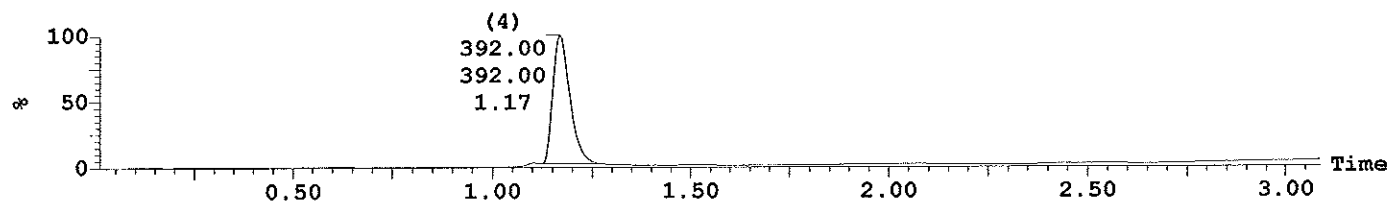

1: MS ES- :TIC Smooth (SG, 1x2)

5.2e+007

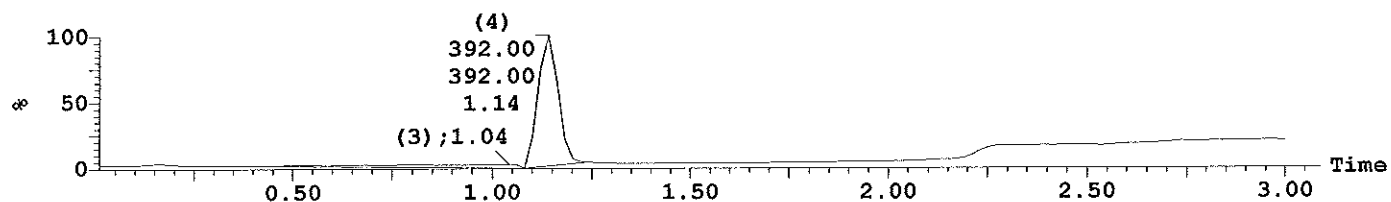

1: MS ES- :391 Smooth (SG, 1x2)

1.1e+007

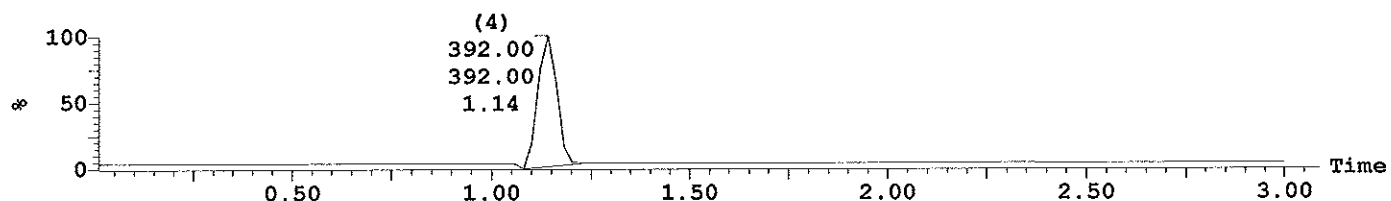

2: MS ES+ :TIC Smooth (SG, 1x2)

1.3e+008

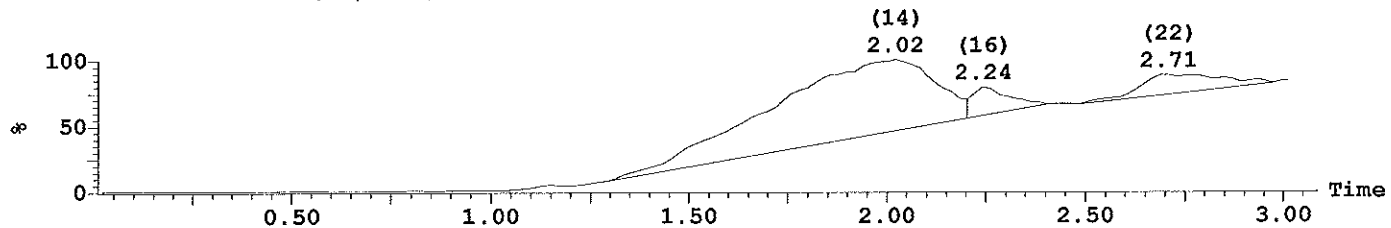

2: MS ES+ :393 Smooth (SG, 1x2)

1.7e+005

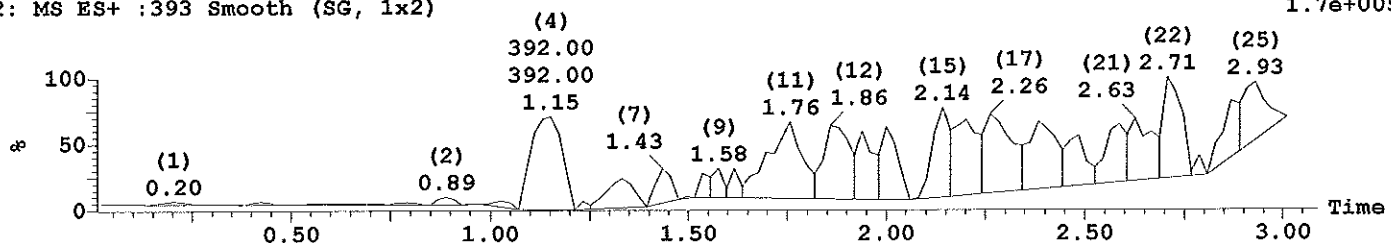

Sample: 1  
File:0713R035  
Description:

Vial:1:A,1  
Date:13-Jul-2006

ID:119-53  
Time:14:35:38

Printed: Thu Jul 13 14:41:49 2006

Sample Report (continued):

Peak ID Time  
4 1.14

Combine (55:59-(44:47+69:72))

1:MS ES-  
5.8e+006

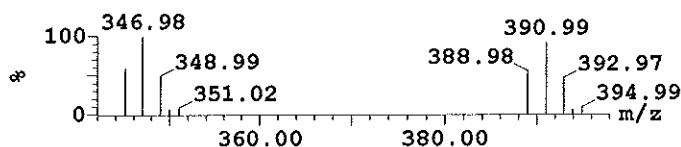

Peak ID Time  
9 1.58

Combine (76:80-(67:70+86:89))

2:MS ES+  
1.9e+006

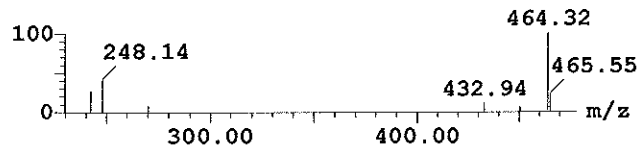

Peak ID Time  
11 1.76

Combine (85:89-(71:74+97:100))

2:MS ES+  
5.7e+006

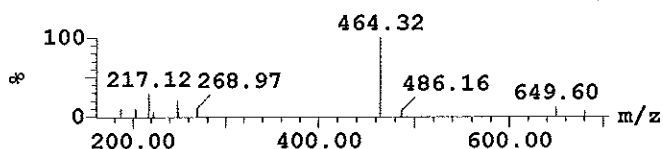

Peak ID Time  
12 1.86

Combine (90:94-(80:83+102:105))

2:MS ES+  
5.4e+006

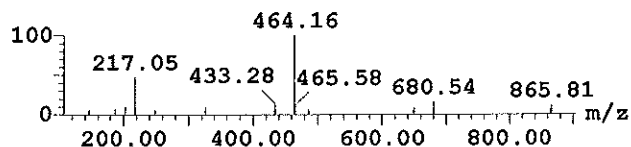

Peak ID Time  
13 1.94

Combine (94:98-(85:88+105:108))

2:MS ES+  
4.5e+006

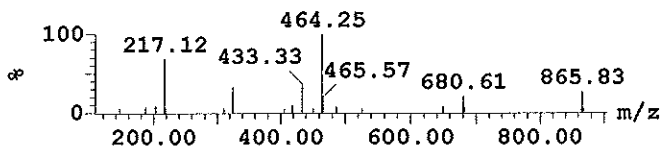

Peak ID Time  
14 2.02

Combine (98:102-(54:57+116:119))

2:MS ES+  
1.7e+007

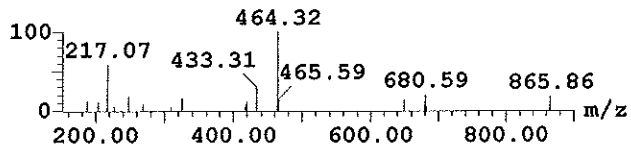

Peak ID Time  
18 2.38

Combine (116:120-(106:109+128:131))

2:MS ES+  
2.5e+006

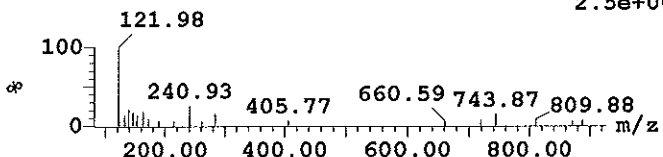

Peak ID Time  
20 2.59

Combine (126:130-(115:118+136:139))

2:MS ES+  
2.1e+006

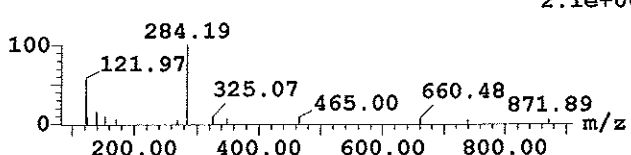

Peak ID Time  
21 2.63

Combine (128:132-(119:122+140:143))

2:MS ES+  
3.6e+006

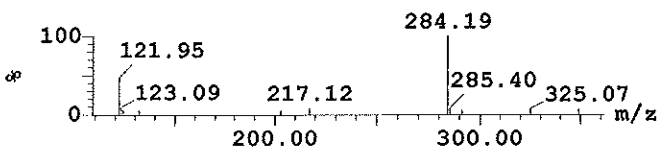

Peak ID Time  
22 2.71

Combine (132:136-113:116)

2:MS ES+  
3.0e+006

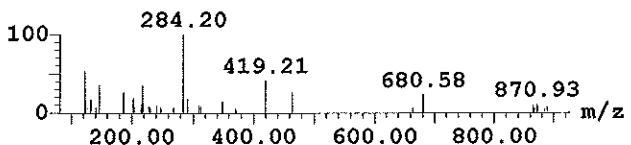

# Analytical HPLC Report

File: = C:\CLASS-VP\CHROM\1004F.021  
 Sample ID: = 187-02-09 MW 381  
 Acquired: = 10/4/2006 12:23:46 PM  
 User = weixu.zhai  
 Instrument = WFD-409D-LCMS2  
 Well = 192 Inj. Vol. = 10 uL  
 Start % B = 0  
 Final % B = 100  
 Gradient Time = 2 min  
 Flow Rate = 5 ml/min  
 Wavelength = 220  
 Solvent A = H2O : ACN 95% : 5% 10 mM Ammonium Acetate  
 Solvent B = H2O : ACN 5% : 95% 10 mM Ammonium Acetate  
 Column 2 = Xbridge C18 4.6 x 50MM S5

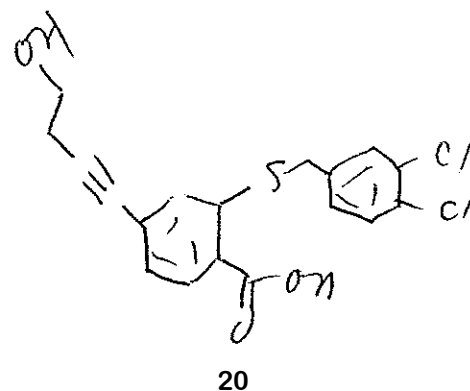

187-02-09

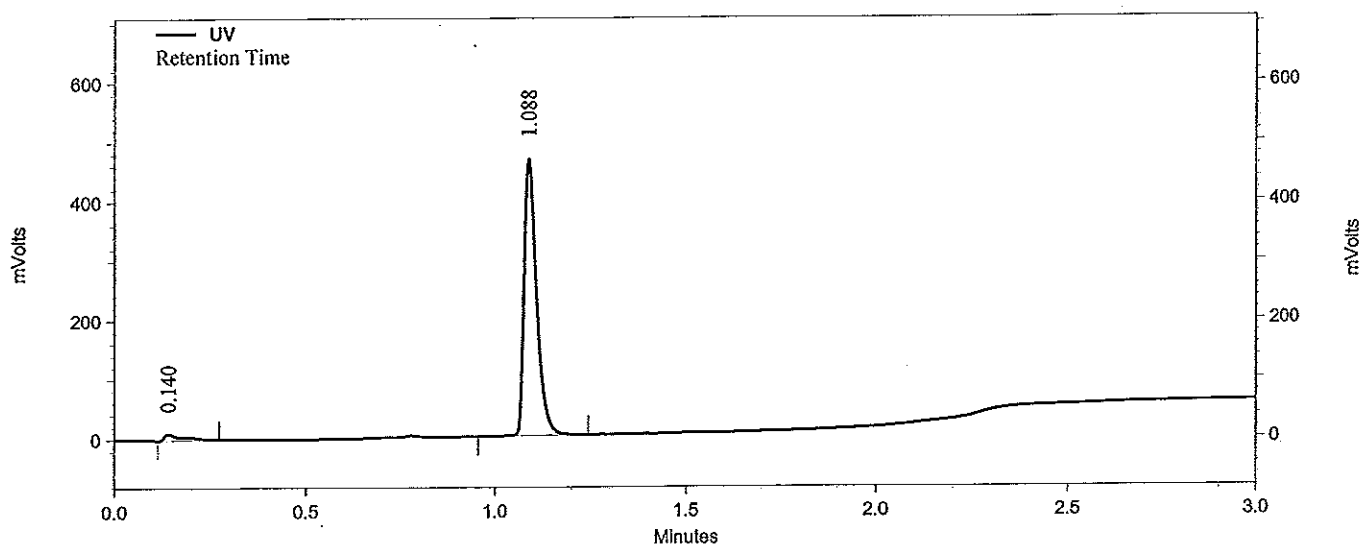

| UV Results |       |         |         |             |        |
|------------|-------|---------|---------|-------------|--------|
| Pk #       | RT    | Area    | Area %  | Height (uV) | Plates |
| 1          | 0.140 | 37380   | 3.432   | 10966       | 68     |
| 2          | 1.088 | 1051869 | 96.568  | 466617      | 5588   |
| Totals     |       | 1089249 | 100.000 | 477583      |        |

Sample: 1

Vial:1:A,1

ID:187-02-09

File:1004F021

Date:04-Oct-2006

Time:12:19:55

Description:

Printed: Wed Oct 04 12:24:58 2006

## Sample Report:

Channel 1 4.7e+005

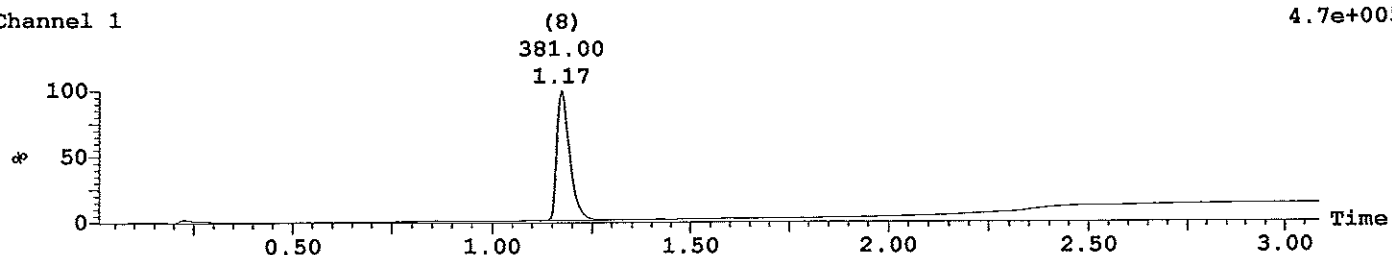

1: MS ES- :TIC Smooth (SG, 1x2) 5.1e+006

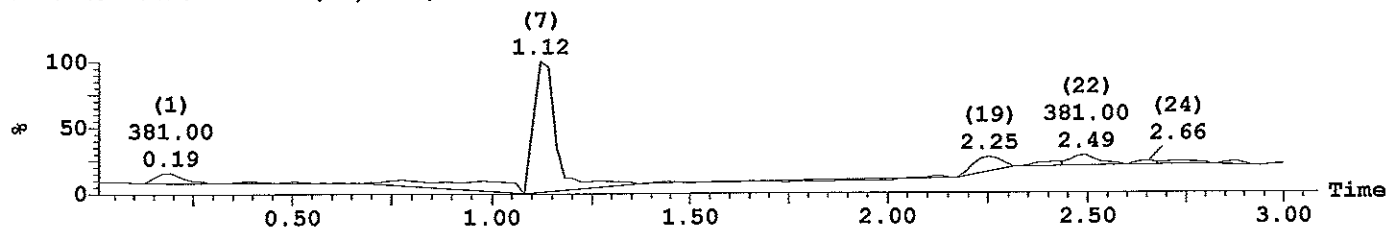

1: MS ES- :380 Smooth (SG, 1x2) 1.6e+005

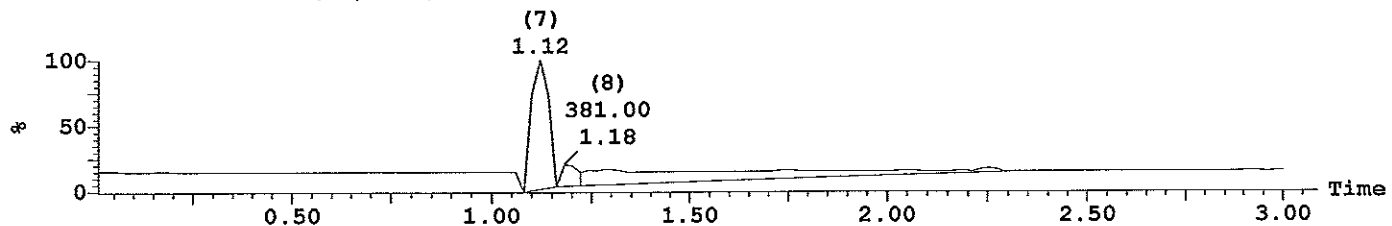

2: MS ES+ :TIC Smooth (SG, 1x2) 2.2e+007

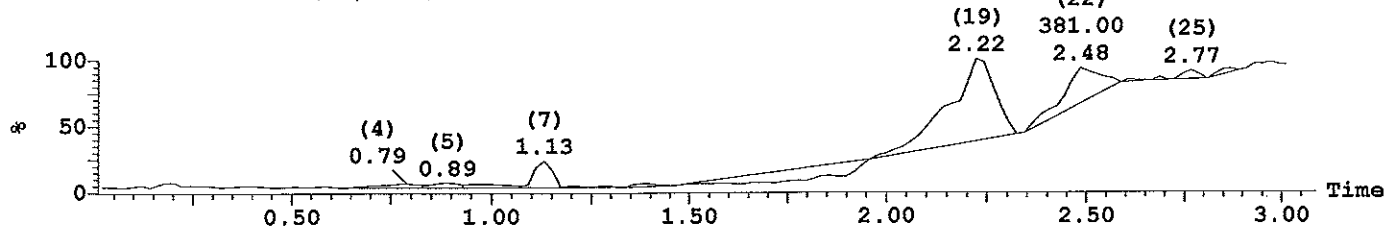

2: MS ES+ :382 Smooth (SG, 1x2) 1.1e+005

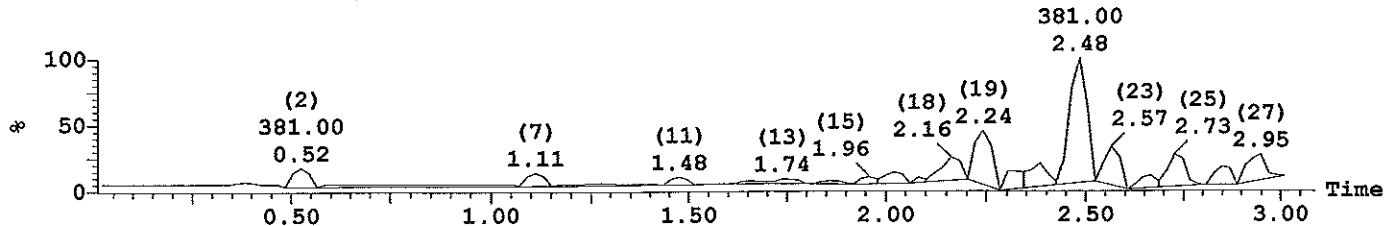

Sample: 1

Vial:1:A,1

ID:187-02-09

File:1004F021

Date:04-Oct-2006

Time:12:19:55

Description:

Printed: Wed Oct 04 12:24:58 2006

## Sample Report (continued):

Peak ID Time  
7 1.12  
Combine (54:58-(43:46+65:68))

2:MS ES+  
4.6e+005

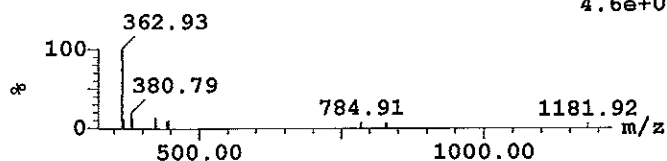

Peak ID Time  
8 1.18  
Combine (56:61-(42:44+73:76))

1:MS ES-  
3.9e+005

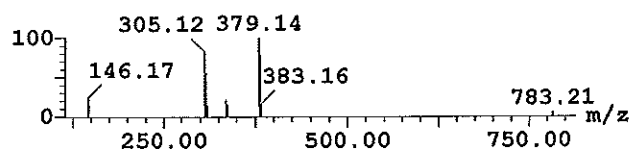

Peak ID Time  
8 1.18  
Combine (56:60-(42:44+73:75))

2:MS ES+  
4.0e+005

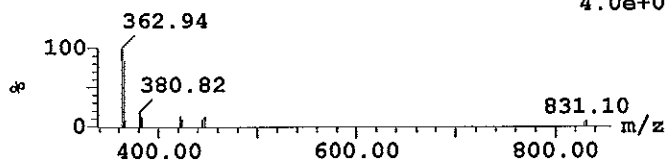

Peak ID Time  
17 2.08  
Combine (101:105-(92:95+111:114))

2:MS ES+  
3.1e+005

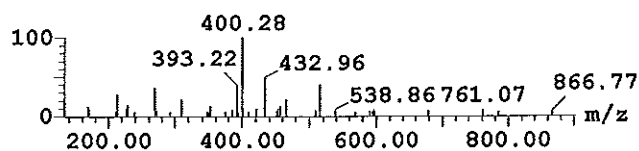

Peak ID Time  
18 2.16  
Combine (105:109-(94:97+116:119))

2:MS ES+  
6.8e+005

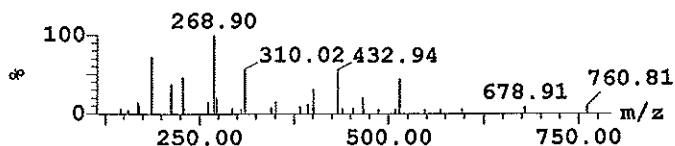

Peak ID Time  
19 2.25  
Combine (108:112-(87:90+122:125))

2:MS ES+  
6.5e+005

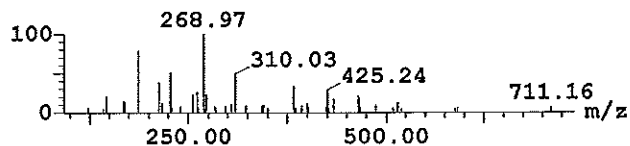

Peak ID Time  
20 2.30  
Combine (112:116-(103:106+123:126))

2:MS ES+  
5.7e+005

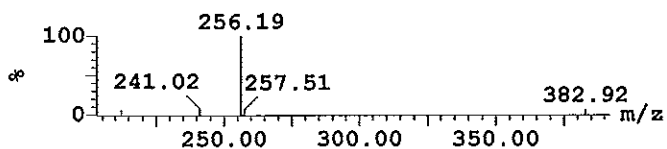

Peak ID Time  
22 2.49  
Combine (121:125-(110:113+132:135))

2:MS ES+  
2.0e+005

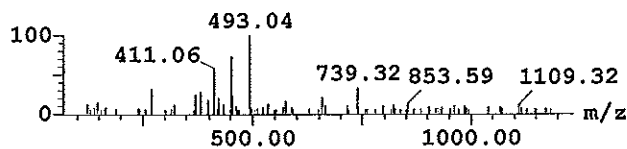

Peak ID Time  
23 2.57  
Combine (125:129-(115:118+136:139))

2:MS ES+  
4.6e+005

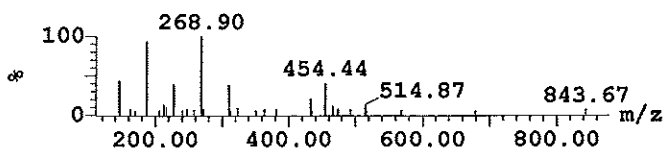



## Analytical HPLC Report

File: =  
 c:\shimadzu\data\public\shirong.zhu\20100405\2010\_0405\_1624-027.dat  
 Sample ID: = 86453-003T3  
 Acquired: = 4/5/2010 4:28:35 PM  
 File = 2010\_0405\_1624.027  
 User = shirong.zhu  
 Instrument = WFD-409D-LCMS2  
 Well = 177 Inj. Vol. = 10 uL  
 Start % B = 0  
 Final % B = 100  
 Gradient Time = 4 min  
 Flow Rate = .8 ml/min  
 Wavelength = 220  
 Solvent Pair = Water/Methanol/Ammonium Acetate  
 Solvent A = 95% Water/ 5% Methanol/10 mM Ammonium Acetate  
 Solvent B = 5% Water/ 95% Methanol/10 mM Ammonium Acetate  
 Column 2 = (2) PHENOMENEX-LUNA 2.0 x 50 mm 3um  
 MW1 = 132+/-

86453-003T3

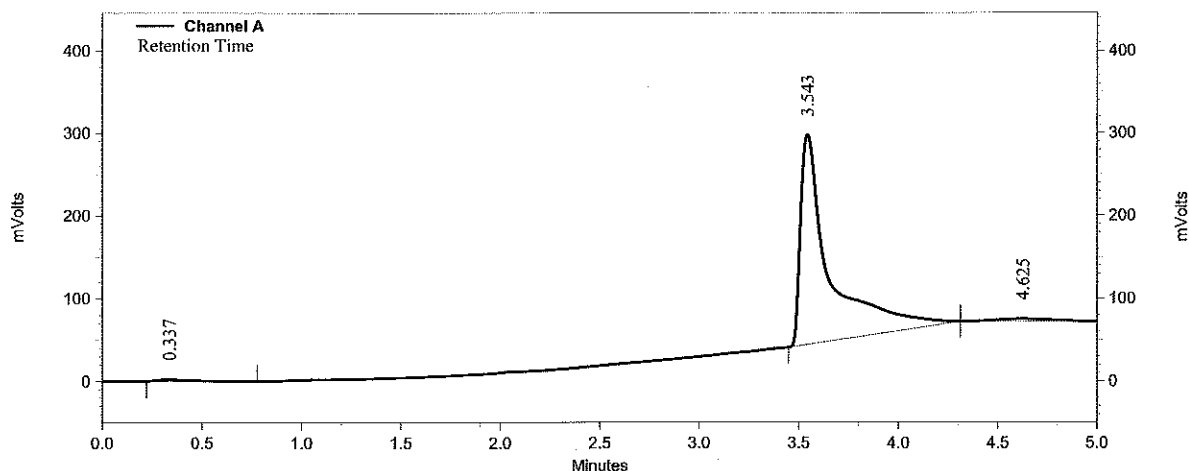

### Channel A Results

| Pk #   | RT    | Area    | Area %  | Height (uV) | Plates |
|--------|-------|---------|---------|-------------|--------|
| 1      | 0.337 | 29983   | 1.111   | 2606        | 27     |
| 2      | 3.543 | 2612521 | 96.787  | 253206      | 4607   |
| 3      | 4.625 | 56750   | 2.102   | 2950        | 1203   |
| Totals |       | 2699254 | 100.000 | 258762      |        |

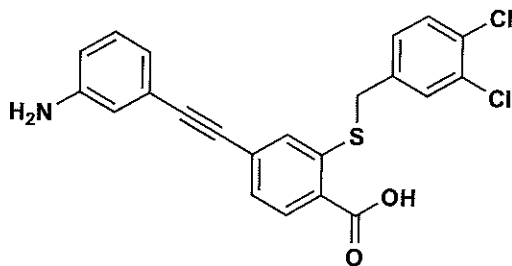

Exact Mass: 427.02

Compound 21

Openlynx Report BMS LCMS Report- shirong.zhu

Page 1

Sample: 1  
 File: 2010\_0405\_1624-027  
 Description:

Vial: 1:A,1  
 Date: 05-Apr-2010

ID: 86453-003T3  
 Time: 16:25:59

Printed: Mon Apr 05 16:33:38 2010

Sample Report:

uv spec

3.0e+005

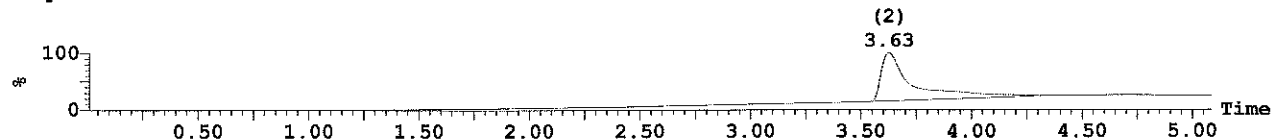

1: MS ES- :TIC Smooth (SG, 1x2)

2.2e+007

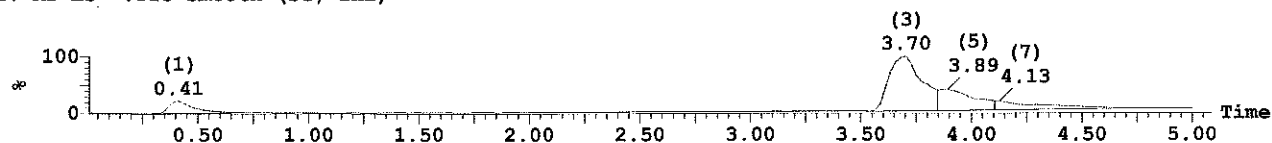

2: MS ES+ :TIC Smooth (SG, 1x2)

4.7e+007

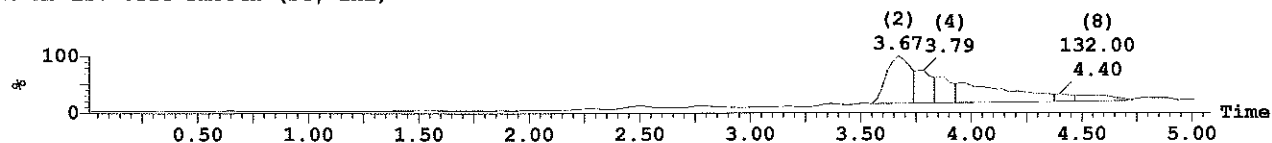

Peak ID Time  
 1 0.41

Combine (14:22-(1+44:46))

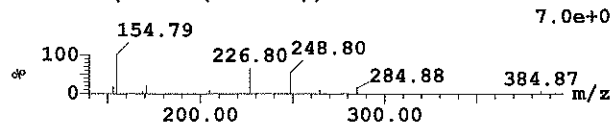

Peak ID Time  
 2 3.67

Combine (150:159-(136:138+197:200))

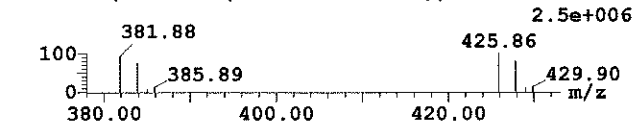

Peak ID Time  
 2 3.67

Combine (150:158-(135:138+197:199))

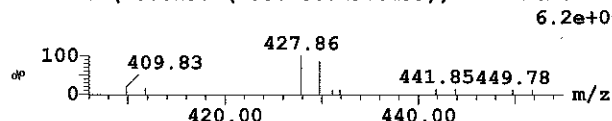

Peak ID Time  
 3 3.71

Combine (154:162-(136:138+177:179))

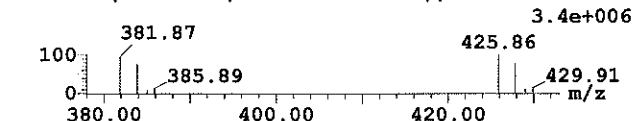

Peak ID Time  
 4 3.79

Combine (157:165-(144:146+176:178))

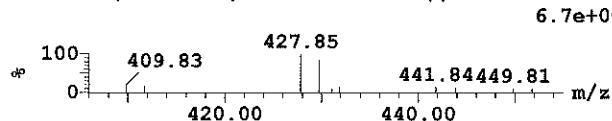

Openlynx Report BMS LCMS Report- shirong.zhu

Page 2

Sample: 1  
File: 2010\_0405\_1624-027  
Description:

Vial: 1:A,1  
Date: 05-Apr-2010

ID: 86453-003T3  
Time: 16:25:59

Printed: Mon Apr 05 16:33:38 2010

Sample Report (continued):

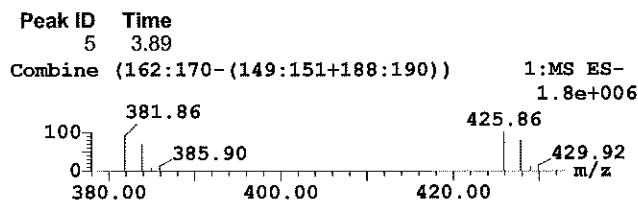

# Analytical HPLC Report

File: = C:\CLASS-VP\CHROM\0126G.025  
 Sample ID: = 62464-130-1 MW 50  
 Acquired: = 1/26/2007 11:06:45 AM  
 User = shirong.zhu  
 Instrument = WFD-409D-LCMS  
 Well = 121 Inj. Vol. = 5 uL  
 Start % B = 0  
 Final % B = 100  
 Gradient Time = 3 min  
 Flow Rate = 4 ml/min  
 Wavelength = 220  
 Solvent A = 10% MeOH - 90% H2O - 0.1% TFA  
 Solvent B = 90% MeOH - 10% H2O - 0.1% TFA  
 Column 6 = (6) XTERRA 4.6 X 30mm S5

62464-130-1

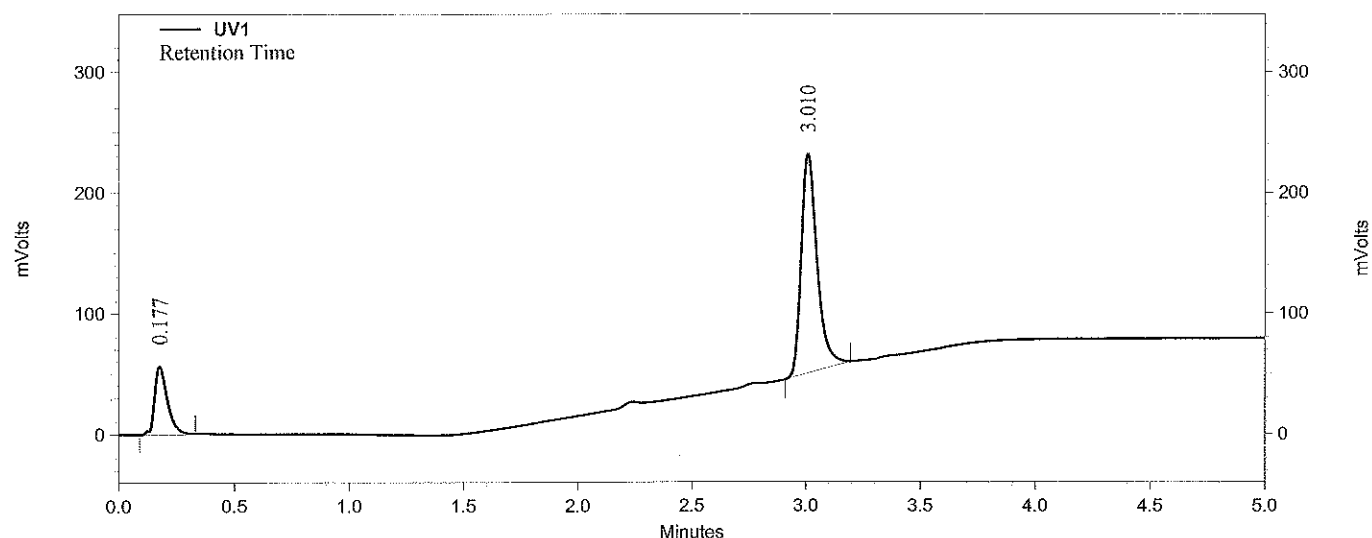

## UV1 Results

| Pk # | RT    | Area   | Area % | Height (uV) | Plates |
|------|-------|--------|--------|-------------|--------|
| 1    | 0.177 | 219326 | 20.032 | 56441       | 52     |
| 2    | 3.010 | 875565 | 79.968 | 181570      | 9405   |

|        |  |         |         |        |  |
|--------|--|---------|---------|--------|--|
| Totals |  | 1094891 | 100.000 | 238011 |  |
|--------|--|---------|---------|--------|--|

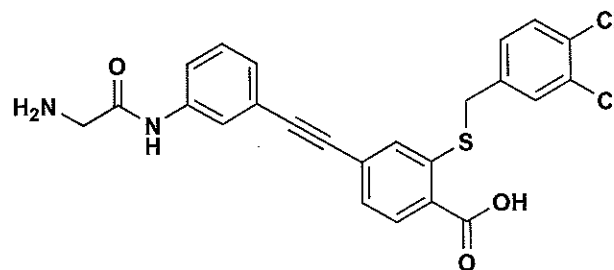

Exact Mass: 484.04

**Compound 22**

Sample: 1  
File:0126G025  
Description:

Vial:1:A,1  
Date:26-Jan-2007

ID:62464-130-1  
Time:11:03:50

Printed: Fri Jan 26 11:10:05 2007

### Sample Report:

uv spec

2.3e+005

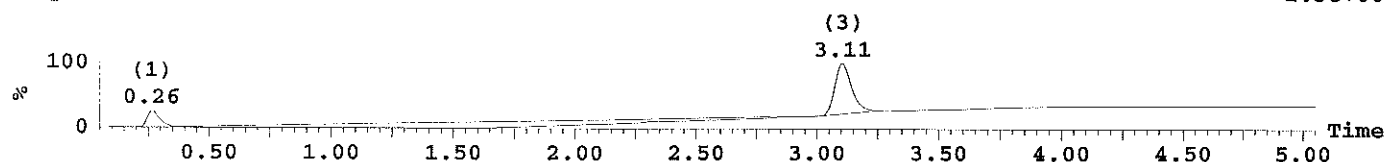

1: MS ES+ :TIC Smooth (SG, 1x2)

2.3e+005

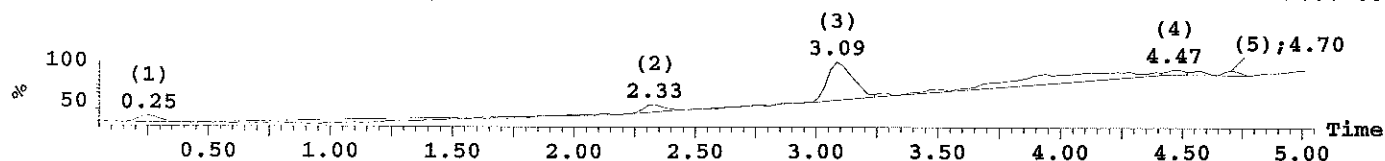

1: MS ES+ :51 Smooth (SG, 1x2)

0.0e+000

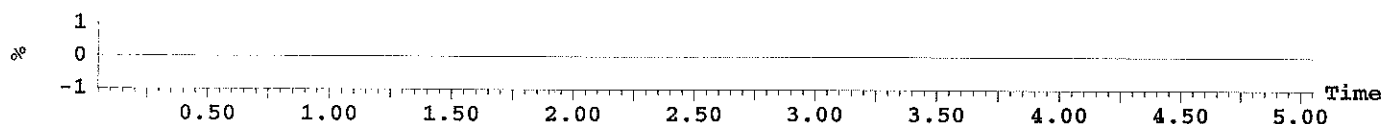

Peak ID Time  
1 0.25

Combine (6:15-29:31)

1:MS ES+  
2.0e+003

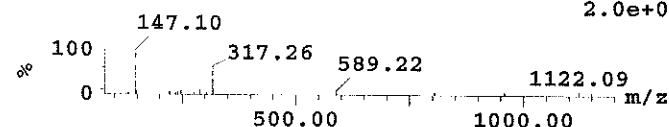

Peak ID Time  
2 2.33

Combine (96:104-(80:82+116:118))

1:MS ES+  
3.4e+003

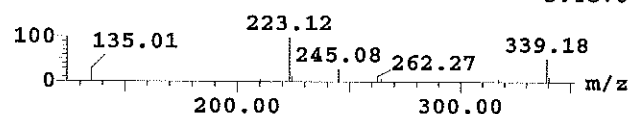

Peak ID Time  
3 3.09

Combine (127:135-(113:115+148:150))

1:MS ES+  
1.8e+004

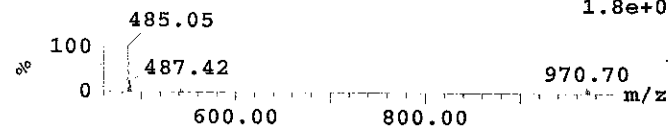

Peak ID Time  
4 4.47

Combine (179:187-(168:170+196:198))

1:MS ES+  
2.7e+003

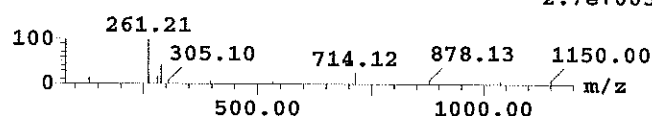

Peak ID Time  
5 4.70

Combine (188:196-177:179)

1:MS ES+  
1.1e+003

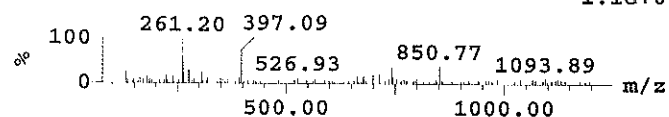

# Analytical HPLC Report

File: = C:\CLASS-VP\CHROM\0111S.023  
 Sample ID: = 31-6-12 MW 447  
 Acquired: = 1/11/2007 3:06:01 PM  
 User = weixu.zhai  
 Instrument = WFD-409D-LCMS2  
 Well = 192 Inj. Vol. = 10 uL  
 Start % B = 0  
 Final % B = 100  
 Gradient Time = 2 min  
 Flow Rate = 5 ml/min  
 Wavelength = 220  
 Solvent A = H2O : ACN 95% : 5% 10 mM Ammonium Acetate  
 Solvent B = H2O : ACN 5% : 95% 10 mM Ammonium Acetate  
 Column 2 = Xbridge C18 4.6 x 50MM S5

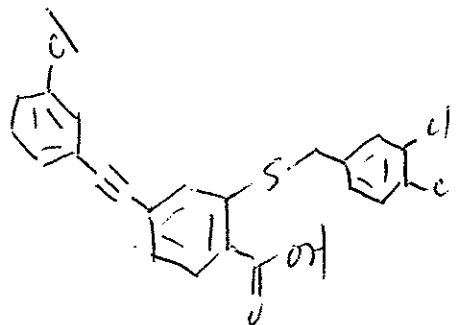

23

31-6-12

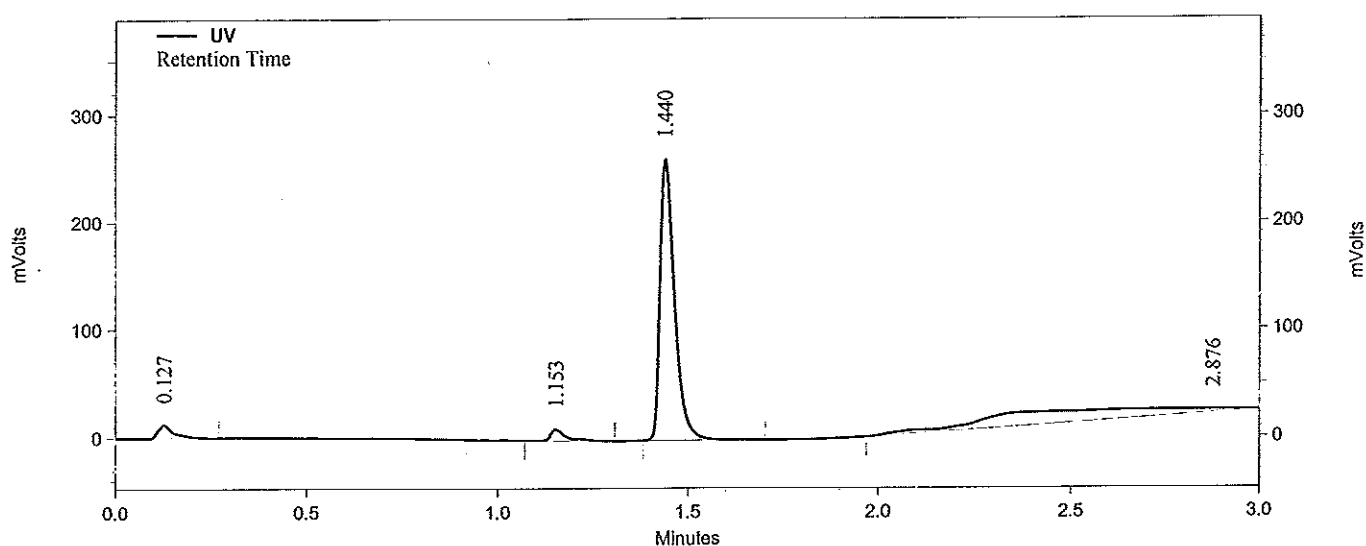

## UV Results

| Pk # | RT    | Area   | Area % | Height (uV) | Plates |
|------|-------|--------|--------|-------------|--------|
| 1    | 0.127 | 37034  | 3.303  | 12606       | 54     |
| 2    | 1.153 | 29774  | 2.655  | 10423       | 5130   |
| 3    | 1.440 | 681928 | 60.820 | 261146      | 7544   |
| 4    | 2.876 | 372496 | 33.222 | 2985        | 165    |

|        |  |         |         |        |  |
|--------|--|---------|---------|--------|--|
| Totals |  | 1121232 | 100.000 | 287160 |  |
|--------|--|---------|---------|--------|--|

Sample: 1

Vial:1:A,1

ID:31-6-12

File:0111S023

Date:11-Jan-2007

Time:14:58:08

Description:

Printed: Thu Jan 11 15:03:11 2007

## Sample Report:

Channel 1

2.6e+005

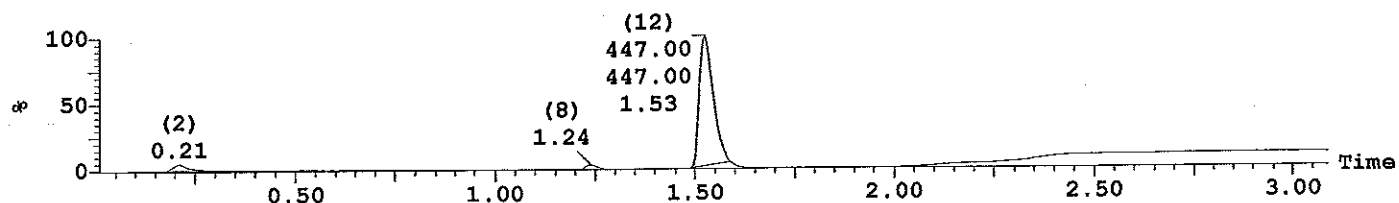

1: MS ES- :TIC Smooth (SG, 1x2)

2.7e+007

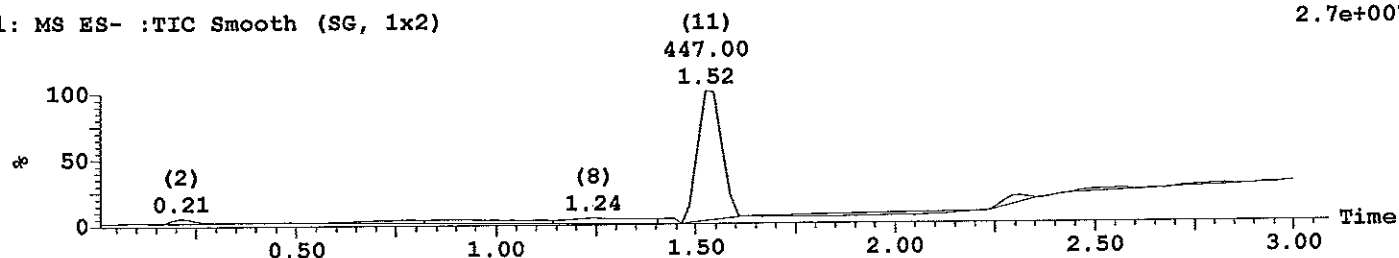

1: MS ES- :446 Smooth (SG, 1x2)

2.4e+004

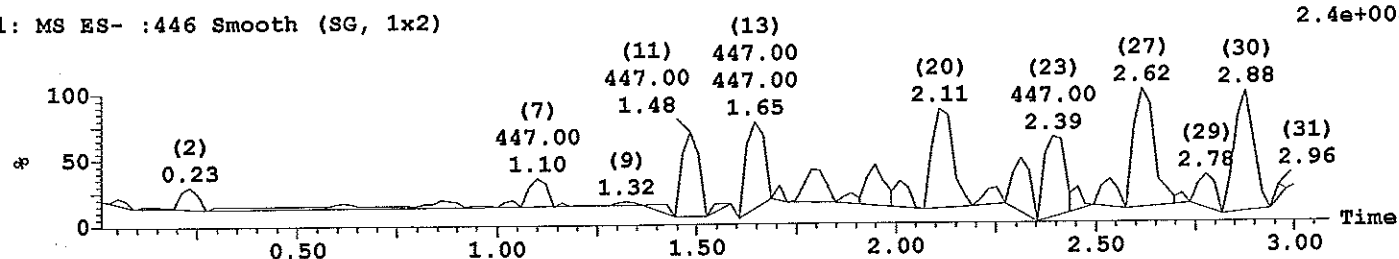

2: MS ES+ :TIC Smooth (SG, 1x2)

1.5e+008

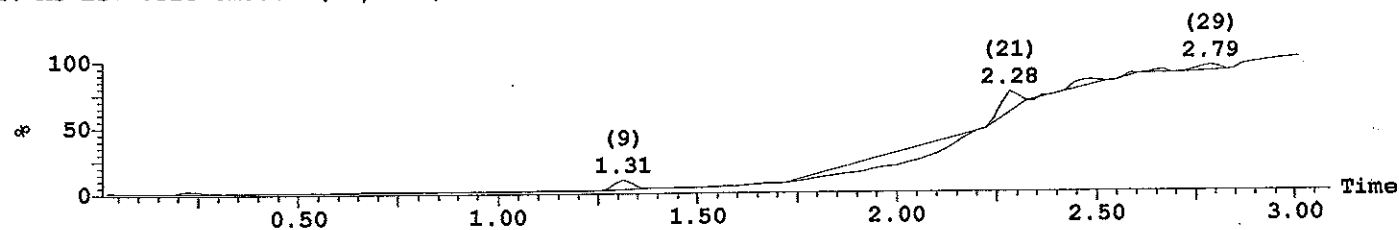

2: MS ES+ :448 Smooth (SG, 1x2)

3.1e+005

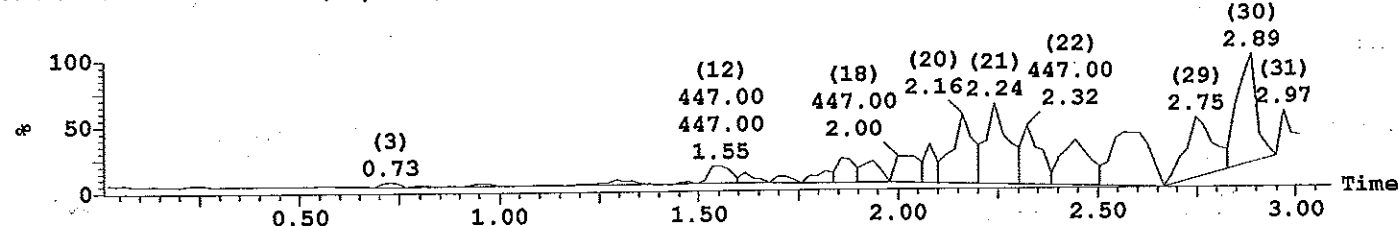

Sample: 1  
File:0111S023  
Description:

Vial:1:A,1  
Date:11-Jan-2007

ID:31-6-12  
Time:14:58:08

Printed: Thu Jan 11 15:03:11 2007

Sample Report (continued):

Peak ID Time  
9 1.32  
Combine (63:67-(52:55+75:78))

2:MS ES+  
2.7e+006

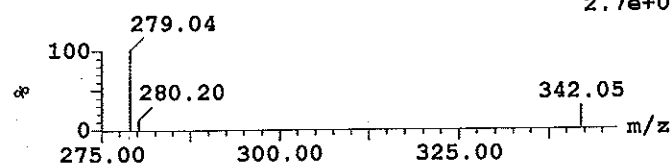

Peak ID Time  
11 1.52  
Combine (74:78-(63:66+88:91))

1:MS ES-  
4.0e+006

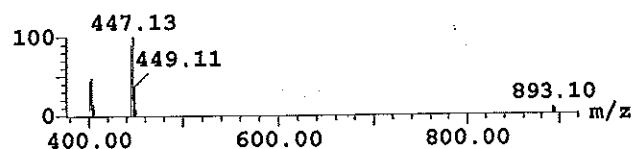

Peak ID Time  
12 1.54  
Combine (74:79-(64:67+87:89))

1:MS ES-  
3.4e+006

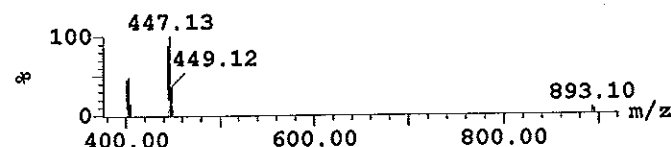

Peak ID Time  
20 2.11  
Combine (105:109-(94:97+116:119))

2:MS ES+  
2.8e+006

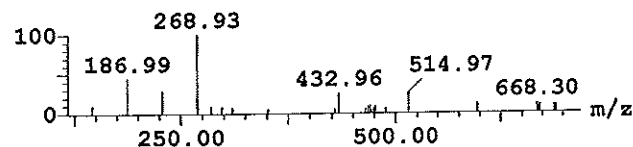

Peak ID Time  
21 2.25  
Combine (111:115-(100:103+122:125))

2:MS ES+  
4.3e+006

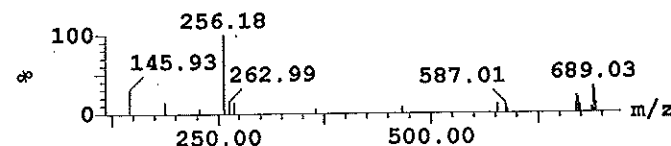

Peak ID Time  
22 2.31  
Combine (113:117-(104:107+125:128))

2:MS ES+  
4.1e+006

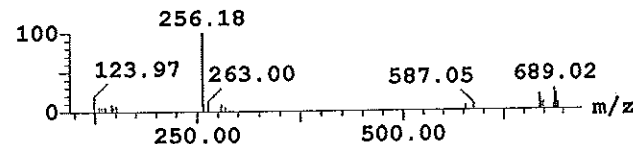

Peak ID Time  
24 2.45  
Combine (121:125-(109:112+132:135))

2:MS ES+  
1.9e+006

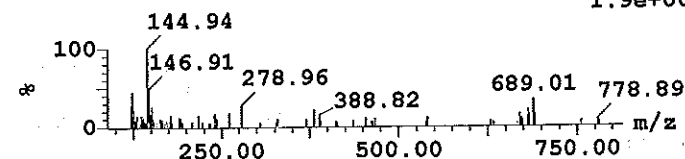

Peak ID Time  
25 2.57  
Combine (125:129-(114:117+139:142))

2:MS ES+  
1.7e+006

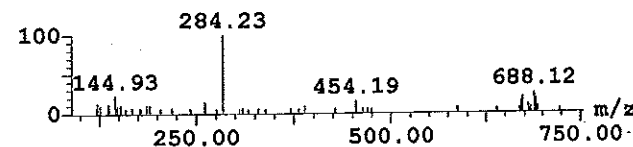

Peak ID Time  
27 2.62  
Combine (130:134-(119:122+140:143))

2:MS ES+  
1.9e+006

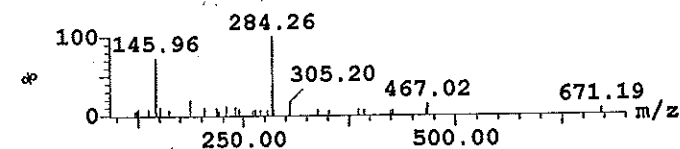

Peak ID Time  
29 2.82  
Combine (136:140-(124:127+147:149))

2:MS ES+  
1.4e+006

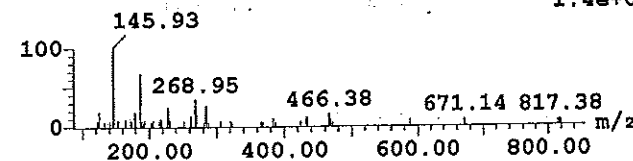

Supplement: Supplementary file 1 [file 4251250]
